# Supplementary material
Source: PubMed Central journal article supplement (PMC10149583)
Supplement: NIHMS1857845-supplement-All_Supp_Materials.pdf [file NIHMS1857845-supplement-All_Supp_Materials.pdf]

## Supplementary Appendix

### Table of Contents

|                                                                                                                                                                                                                                                                                                        | <b>Page</b> |
|--------------------------------------------------------------------------------------------------------------------------------------------------------------------------------------------------------------------------------------------------------------------------------------------------------|-------------|
| <b>Supplementary Methods</b>                                                                                                                                                                                                                                                                           |             |
| <b>Supplemental Figures</b>                                                                                                                                                                                                                                                                            | 2           |
| 1. Figure S1. Study population.                                                                                                                                                                                                                                                                        | 4           |
| 2. Figure S2. Directed acyclic graph.                                                                                                                                                                                                                                                                  | 5           |
| 3. Figure S3. Cumulative late mortality among five-year survivors of childhood cancer.                                                                                                                                                                                                                 | 6           |
| 4. Figure S4. Cumulative late mortality among five-year survivors conditioned on survival from diagnosis in five-year periods.                                                                                                                                                                         | 7           |
| 5. Figure S5. All-cause cumulative mortality by diagnosis among five-year survivors of (a) hematologic malignancies and (b) solid tumors and brain tumors.                                                                                                                                             | 8           |
| 6. Figure S6. Cause-specific mortality by diagnosis among five-year survivors as recurrence/progression of primary cancer, health-related and external/accidence cause.                                                                                                                                | 9           |
| 7. Figure S7. Cause specific mortality by survival time overall and by diagnosis for six causes of death (recurrence/progression of primary cancer, specific health-related causes of death: subsequent neoplasm, cardiac, pulmonary, and other health-related causes, and external/accidental causes. | 10          |
| 8. Figure S8. Proportion of cumulative death attributable to each of six causes by survival time overall and by diagnosis.                                                                                                                                                                             | 13          |
| 9. Figure S9. Standardized Mortality Ratios for all-cause and health-related cases of death among five-year survivors compared to the US population by time from diagnosis.                                                                                                                            | 15          |
| 10. Figure S10. Absolute Excess Risk of death per 10,000 person-years by survival time among five-year survivors as cause-specific mortality by diagnosis.                                                                                                                                             | 16          |
| 11. Figure S11. Distribution of lifestyle category and cumulative incidence of modifiable cardiovascular risk factors by age.                                                                                                                                                                          | 17          |
| <b>Supplemental Tables</b>                                                                                                                                                                                                                                                                             |             |
| 12. Table S1. Frequency of deaths by cause in the CCSS modified from the 113 selected causes of death according to the 9th and 10th revision of ICD codes from the National Center for Vital Statistics and Center for Disease Control.                                                                | 18          |
| 13. Table S2. Cumulative incidence of all-cause and cause-specific mortality at 20 years-40 years survival time by cancer diagnosis.                                                                                                                                                                   | 21          |
| 14. Table S3. Standardized mortality ratios and 95% confidence intervals by cause of death in all eligible survivors.                                                                                                                                                                                  | 25          |
| 15. Table S4. Absolute Excess Risk per 10,000 person-years and 95% confidence intervals by cause of death in all eligible survivors.                                                                                                                                                                   | 26          |
| 16. Table S5. Risk of mortality due to specific causes of death in all eligible survivors and associations with treatment exposures.                                                                                                                                                                   | 27          |
| 17. Table S6. Risk of mortality and associations with treatment exposures due to specific causes of death among survivors who have survived at least 30 years from diagnosis.                                                                                                                          | 28          |
| 18. Table S7. Standardized mortality ratio comparing specific causes of death among survivors to that expected in the general US population overall.                                                                                                                                                   | 29          |
| 19. Table S8. Demographic and diagnosis characteristics of 5-year survivors of childhood cancers who are included in modifiable risk analyses by vital status.                                                                                                                                         | 31          |
| 20. Table S9. Standardized mortality ratios and 95% confidence intervals by cause of death among adult CCSS participants by modifiable risk factors.                                                                                                                                                   | 34          |
| 21. Table S10. Absolute excess risk of health-related death per 10,000 person years by healthy lifestyle score and then by number of modifiable cardiovascular risk factors.                                                                                                                           | 37          |
| 22. Table S11. Relative rate of health-related late mortality and association with modifiable lifestyle and cardiovascular risk factors, including interaction between dyslipidemia and other cardiovascular risk factors                                                                              | 39          |
| <b>References</b>                                                                                                                                                                                                                                                                                      | 40          |

## Supplementary Methods

### *Details about the cohort*

The Childhood Cancer Survivor Study (CCSS) was established in the early 1990s for the purpose of investigating late effects in five-year survivors of childhood cancer diagnosed in 1970-1986. It was designed as a multicenter, hospital-based, retrospective cohort study with longitudinal follow-up and initially included a consortium of 26 pediatric oncology centers in North America. It has since expanded to include five-year survivors diagnosed in 1987-1999, now involving 31 centers. Because the goal of CCSS is to serve as a resource for investigating a wide range of late effects, rare and common, the strategy of the CCSS study design was to maximize the quality and quantity of data. The cohort, therefore, tried to recruit all eligible survivors and maximize the sample size of the CCSS cohort available for investigation. The only exception was the under-sampling of ALL survivors in the Expansion Cohort (diagnosed 1987-1999): ALL was the dominant diagnosis and, given a fixed budget, it was decided that under-sampling ALL and inclusion of all the other diagnosis groups would maximize the study power for many investigations of interest. The CCSS identified and recruited all survivors meeting eligibility criteria at participating institutions. Cancer diagnosis and treatment information was abstracted from participating institutions using a standardized medical records abstraction form by individual abstracters who were centrally trained. Eligible participants were contacted to complete baseline and subsequent follow-up questionnaires which included self-reported demographic, education, and socioeconomic factors as well as chronic health conditions and medical events. Next of kin were contacted and asked to complete the baseline questionnaire for eligible participants known to have died after achieving five-year survival. Information on sex (used as a biologic factor in our analyses) was collected in the medical record abstraction (from treating institutions). Information on race and ethnicity was collected as a self-reported variable on surveys to participants. As race and ethnicity information was not included in the medical records abstraction for the original cohort (diagnosed 1970-1986), eligible non-participants from this group do not have data on race/ethnicity. Additional methodologic details of the cohort are available in two previous reports cited here.<sup>1,2</sup>

### *Details about Lifestyle Components and Score*

The healthy behavior score included in this analysis is modeled after similar scores used in other population level mortality analyses that assessed the impact of lifestyle or health behaviors on death. Li Y et al. utilized NHANES (National Health and Nutrition Examination Survey) data to estimate the distribution of a five point lifestyle score including ever smoking, heavy alcohol use, unhealthy BMI, poor diet quality and low physical activity each as a binary (0 or 1) score and evaluated associations with mortality.<sup>3</sup> Similar studies using various components of these 5 indicators (or surrogates of) have also been conducted to determine the association of lifestyle factors with mortality in the US (Behrens G et al. using a 4 point score of waist circumference, diet quality, physical activity and smoking)<sup>4</sup> and internationally in the United Kingdom (Khaw KT et al. using smoking, physical activity, alcohol use and diet)<sup>5</sup> and a multinational global cohort (Yusuf S et al. using tobacco use, alcohol, diet, physical activity and sodium intake).<sup>6</sup> As the CCSS does not collect information on diet quality, we chose to use a 4-point score using BMI in addition to smoking, alcohol use, and physical activity.

As stated in the manuscript, lifestyle factors including smoking, alcohol use, physical activity, and unhealthy weight, were assigned a score of 0 (unhealthy) or 1 (healthy) and combined to create a lifestyle score ranging from 0-4 for each survey time-point. We defined unhealthy as: ever smoked more than 100 cigarettes, heavy or risky drinking (>7 drinks/week or >3 drinks/day for women, >14 drinks/week or >4 drinks/day for men; consistent with the definition of heavy alcohol use from the National Institute of Alcohol Abuse and Alcoholism), body mass index <18.5 (underweight) or  $\geq 30$  (obese) kg/m<sup>2</sup>, and sedentary (0-3 MET-h/week of activity). For low physical activity (3-6 MET-h/week) a score of 0.5 was assigned.<sup>7</sup> The lifestyle score was categorized as unhealthy (0-2), moderately healthy (2.5-3), and healthy (3.5-4).

The choice to use a cut-point for “ever smoker” of 100 cigarettes smoked in an individual’s lifetime is based on the definition of a former/current smoker from the US National Health Interview Survey being “An adult who has smoked 100 cigarettes in his or her lifetime (but has quit smoking/and who currently smokes)” at the time of interview. The National Health Interview Survey and National Health and Nutrition Examination Survey both ask this question to participants and, for those answering yes, collect additional information related to smoking history. The 100 cigarette criterion has been used since tobacco-related questions were introduced to the NHIS in 1965.<sup>8</sup> Similarly, the CCSS surveys ask “Have you smoked at least 100 cigarettes in your entire life?” with additional

questions for those answering “yes”, questionnaires available at <https://ccss.stjude.org/tools-documents/questionnaires/>. By these definitions and widely used survey questions, we defined an individual who has “ever smoked” as one who responded yes to this survey question.

In this analysis, obesity (BMI  $\geq 30$  kg/m<sup>2</sup>) and not overweight (BMI 25- $<30$  kg/m<sup>2</sup>) was categorized as unhealthy. Repeated mortality studies across populations in the US and Europe have identified a U-shaped or J-shaped curve when plotting the relationship between BMI and future risk of death with the nadir of this curve typically at the upper limits of the healthy weight range (BMI 23-25 kg/m<sup>2</sup>). Given the multiple time-points included in this analysis, should overweight progress to obesity it would be recognized as unhealthy in the analysis. And, should overweight contribute to the development of traditional cardiovascular risk factors, they would be accounted for in the analysis. However, we did not feel justified in including overweight at a single timepoint as an “unhealthy” factor because, when looking specifically at future mortality risk in the general population, it is not clear that BMI in the 25-29.9 range alone would confer any greater risk than those in the lower ranges of “normal” weight (18.5-22 for example). Our data were consistent with this trend given that standardized mortality rates (SMR) for all-cause and health-related mortality by BMI categories in table S9 are similar for healthy weight (BMI 18.5- $<25$  kg/m<sup>2</sup>) and overweight (BMI 25- $<30$  kg/m<sup>2</sup>) survivors. In fact, many SMRs for overweight are lower than those for healthy weight. Although we suspect there are cardiometabolic complications associated with overweight in survivors that do increase risk for future comorbidities and likely death, the CVRFs included in the analysis may account for many of these adiposity-related comorbidities.

These factors were collected at the baseline and with each follow-up survey and a score for each participant at each time-point (0-4) was generated and included in the model as a time-varying covariate. For the 20,051 survivors included in the modifiable risk analysis (participating in at least one survey at age 18 or older) there was an average of 2.1 surveys (range 1 – 4 surveys) completed per survivor with 7209, 6420, 3102, and 3320 survivors completing 1, 2, 3, and 4 surveys, respectively. To decrease missingness of lifestyle components, we first used carry-forward; if a survivor previously reported being a non-smoker at one time point and omitted a response at a subsequent time point we assumed the response at the second time point was equal to that at the previous time point for the individual. Second, for individuals without prior surveys and with at least two non-missing lifestyle items we used the mean score of the non-missing items for the individual surveyed to replace missing values.

#### *Details about Statistical Analysis*

Piecewise exponential models were selected for mortality analyses given their ability to provide estimates of absolute rates over time. Piecewise exponential models have been widely-used since late 1970s.<sup>9-11</sup> They approximate models of Cox regression by modeling the baseline hazard of proportional hazards models parametrically with piecewise exponential hazards in the form of a step function<sup>12</sup> or other flexible parametric forms (e.g., restricted cubic splines), the latter being a type of “flexible parametric survival models” and the approach we took. Piecewise-exponential models assume proportional mortality rates in association with covariates. All regression analyses were adjusted for sex, age at diagnosis, attained age during follow-up and race/ethnicity, while modifiable risk analyses further included treatment exposures, educational attainment, income, and insurance status. All sociodemographic covariates were categorized (categories shown in Table 1 and Table S8). Attained age in integer values and each of the treatment variables (cranial irradiation dose, chest irradiation dose, anthracycline dose, alkylator dose) were modeled using a restricted cubic spline to avoid a strict proportionality assumption for continuous variables. Specifically, we modelled the integer values of attained age with a restricted cubic spline with 5 knots selected by the general strategy suggested by Stone and Koo<sup>13</sup> at 22, 30, 35, 40 and 50 for regression on lifestyle factors (Table 2 and S11, using participants  $\geq 18$  years of age) and at 15, 25, 35, 45, and 55 for regression on mortality and associations with the treatment exposures with knots also determined by the strategy of Stone and Koo (Table S5 and S6): thus, within each integer value of age, the hazard is constant but the hazard changes over integer values of attained age according to a flexible restricted cubic spline. An exception to the use of restricted cubic splines for the treatment variables was when we assessed the association of treatment variables with overall and cause-specific mortality: in these models, we assumed a constant per-unit-dose association and targeted its estimation for the multiple treatment variables simultaneously. Regarding the time interval used in analyses, we split each subject’s follow-up time into short segments (i.e., each subject’s single year follow-up is split into up to four segments at the points when the integer values of calendar year, age, or year from cancer diagnosis changed) so that, within each segment, all time variables (the calendar year, age, and year from cancer diagnosis) are constant. The piecewise exponential hazards allow these segmentations because of its memoryless property.

**Figure S1.** Study population.

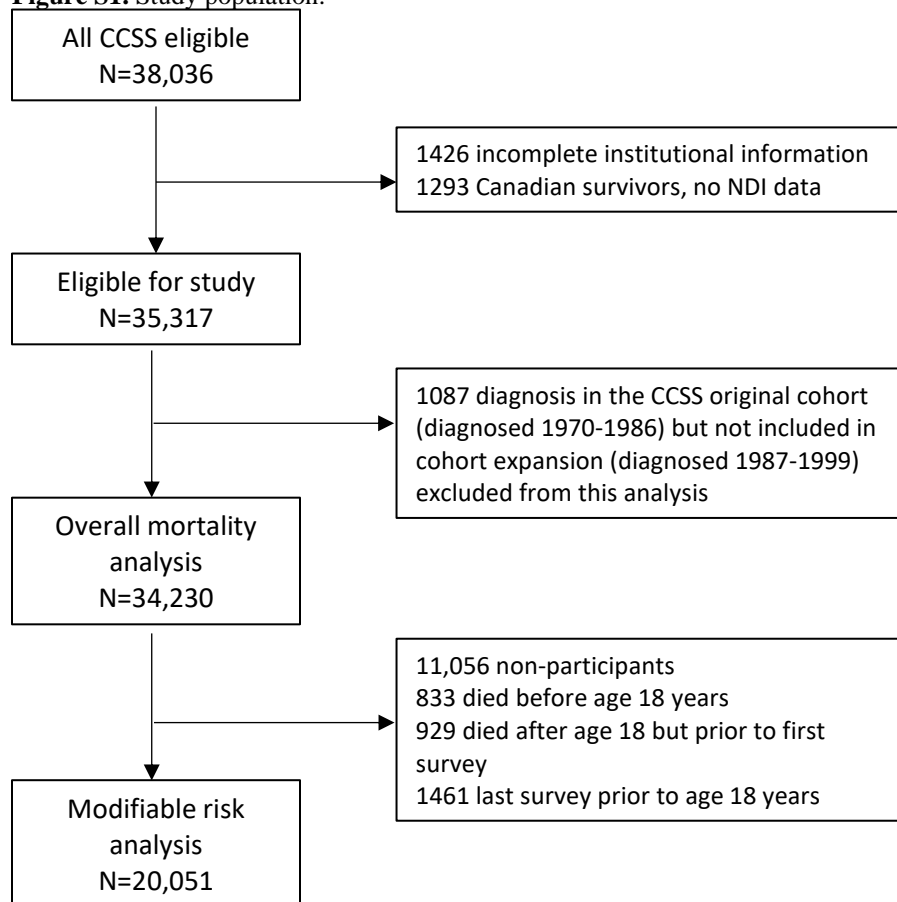

**Figure S2.** Directed acyclic graph of the assumed associations between potentially modifiable lifestyle and cardiovascular risk factors and death with shared risk factors of sociodemographic characteristics and cancer treatment.

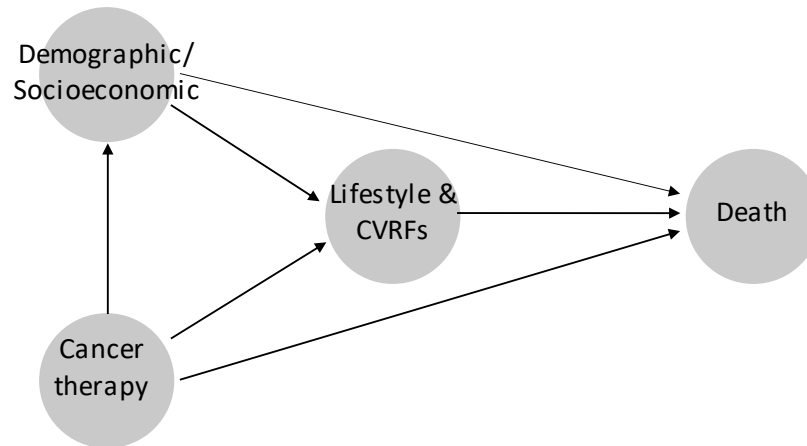

**Figure S3.** Cumulative late mortality among five-year survivors of childhood cancer shown as (a) all-cause cumulative mortality compared to the US population and (b) among five-year survivors diagnosed in the 1970s (black), 1980s (blue) and 1990s (red) by cause-of-death as recurrence or progression of primary cancer, health-related and external/accidental causes of death.

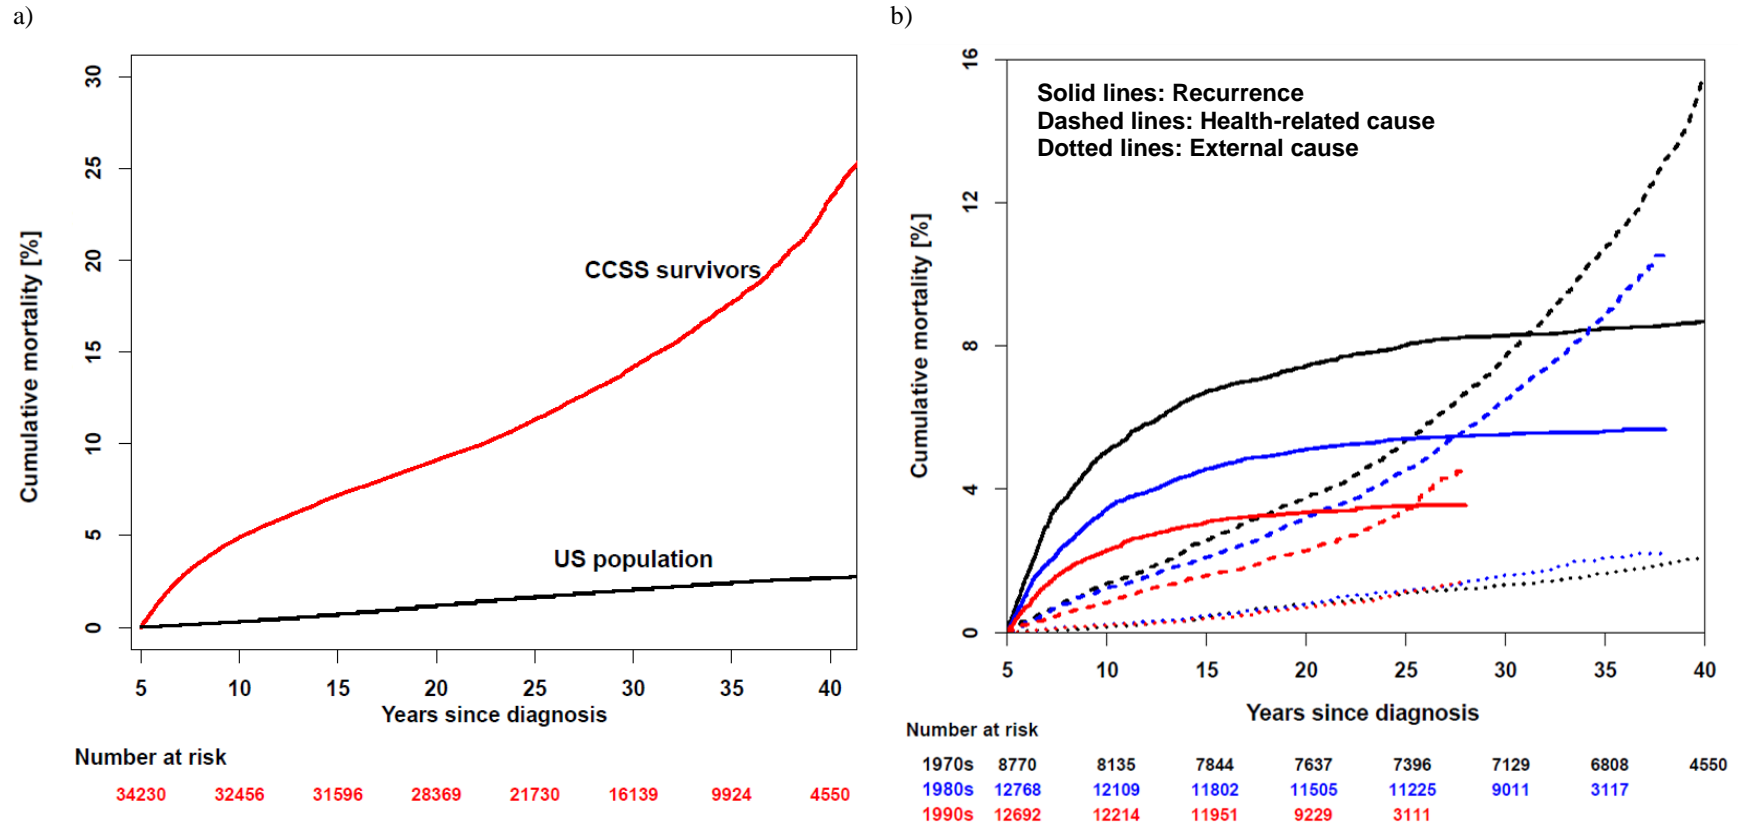

**Figure S4.** Cumulative mortality conditioned on survival from diagnosis in five-year periods (a, b, c) overall and (d, e, f) by sex as (a, d) all-cause, (b, e) recurrence or progression of primary cancer, and (c, f) health-related causes of death.

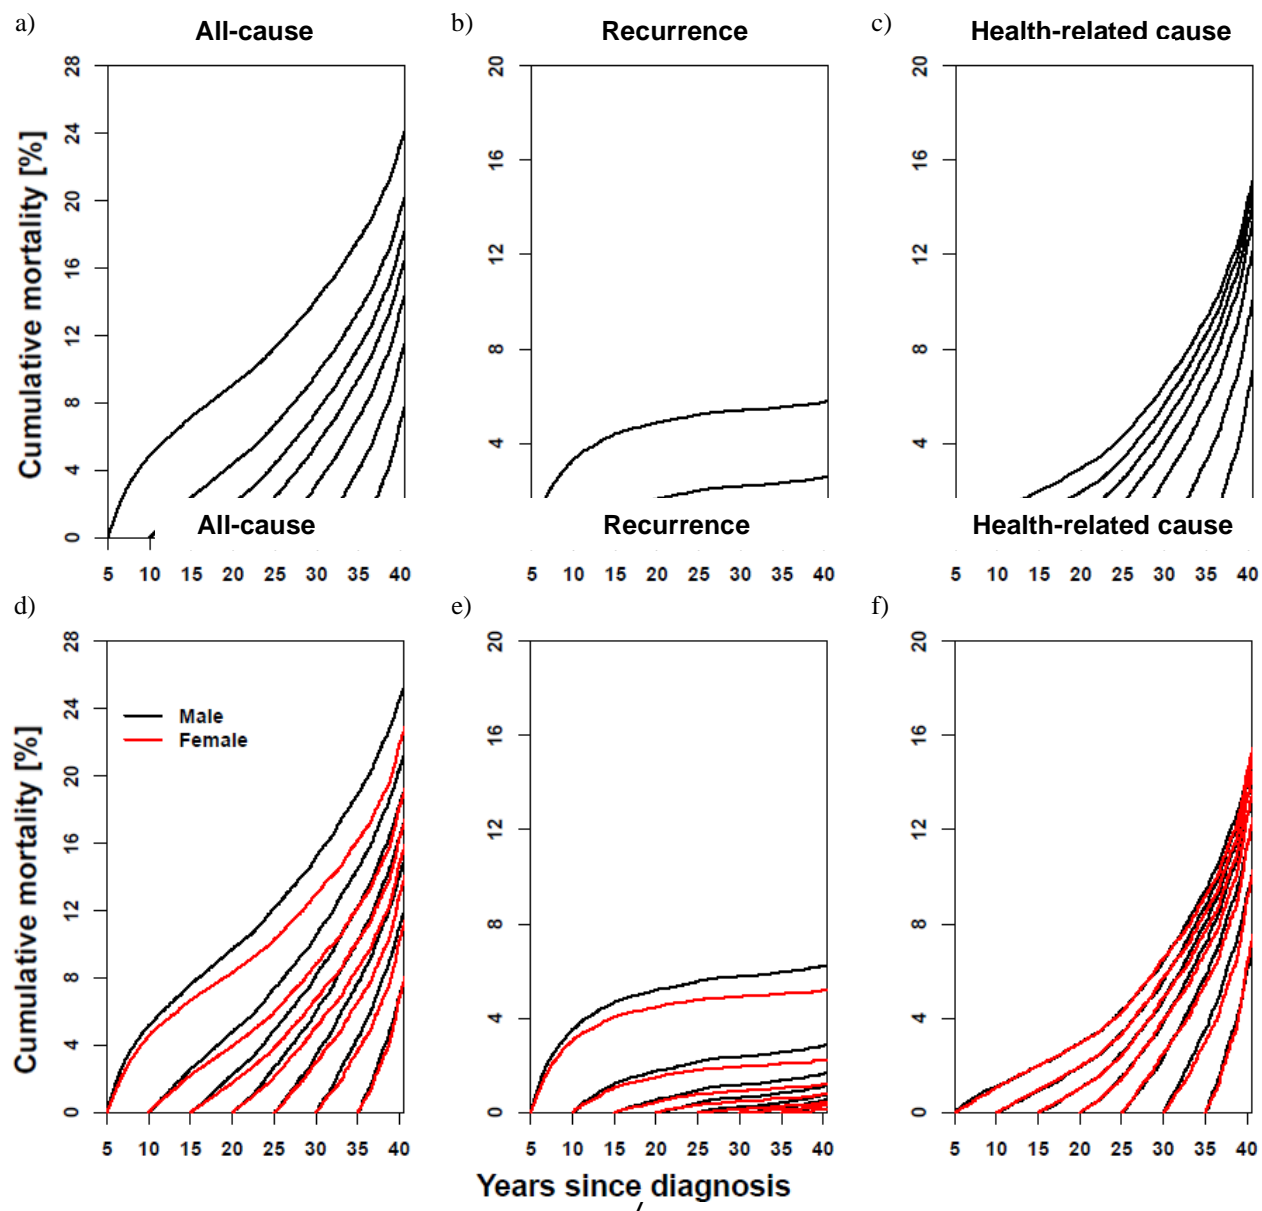

**Figure S5.** All-cause cumulative mortality by diagnosis among five-year survivors of (a) hematologic malignancies and (b) solid tumors and brain tumors.

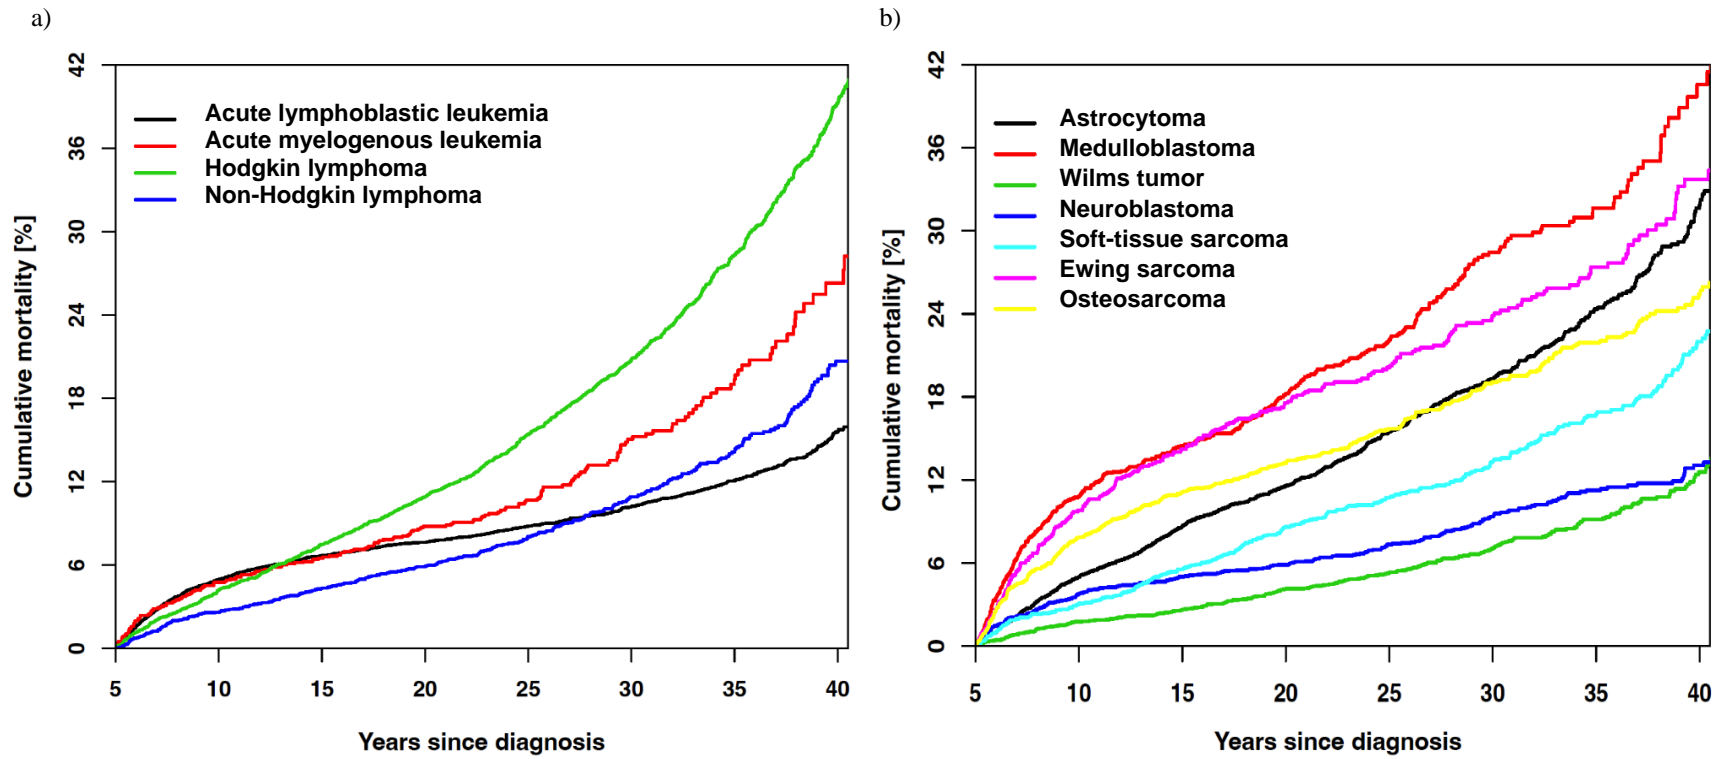



**Figure S6.** Cause-specific mortality by diagnosis as recurrence/progression of primary cancer, health-related and external/accidental cause among five-year survivors of (a) acute lymphoblastic leukemia, (b) acute myeloid leukemia, (c) Hodgkin lymphoma, (d) non-Hodgkin lymphoma, (e) astrocytoma, (f) medulloblastoma, (g) Wilms tumor, (h) neuroblastoma, (i) soft tissue sarcoma, (j) osteosarcoma, and (k) Ewing sarcoma.

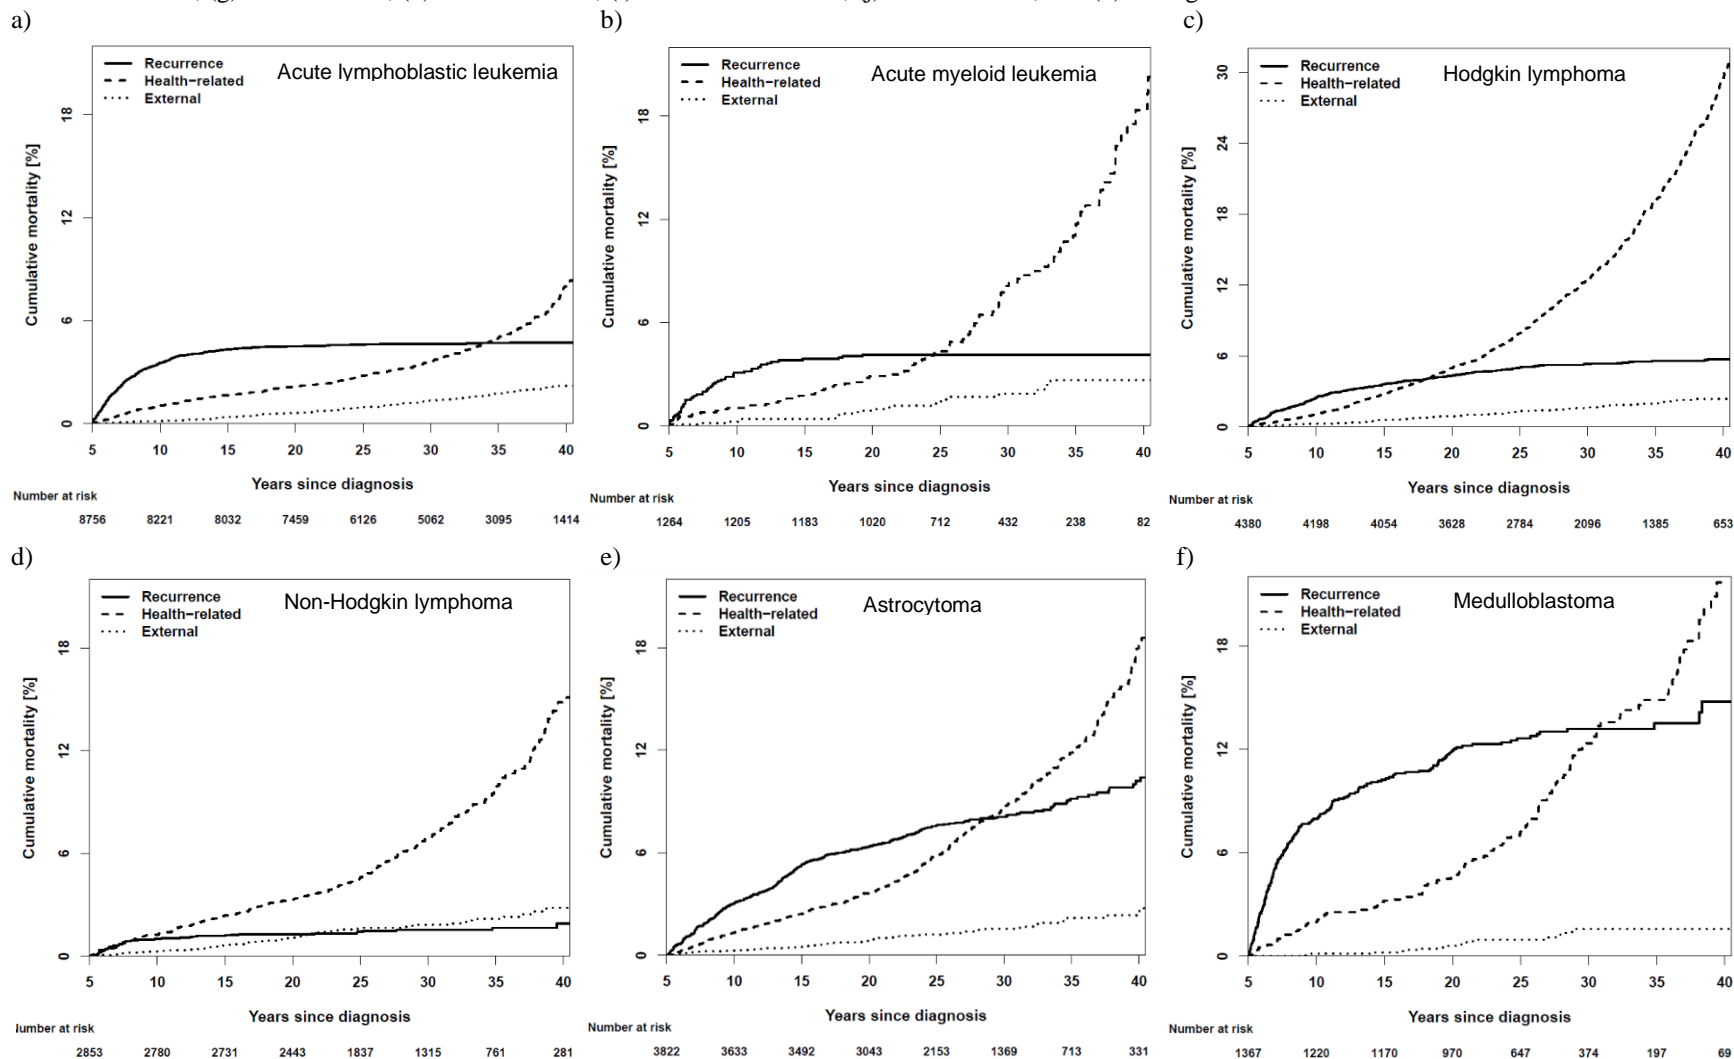

g)

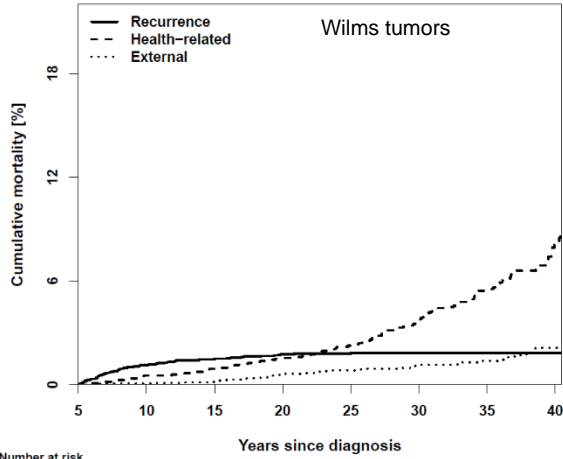

h)

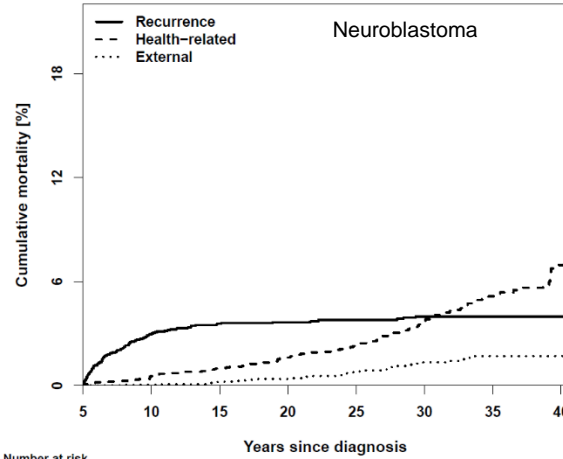

i)

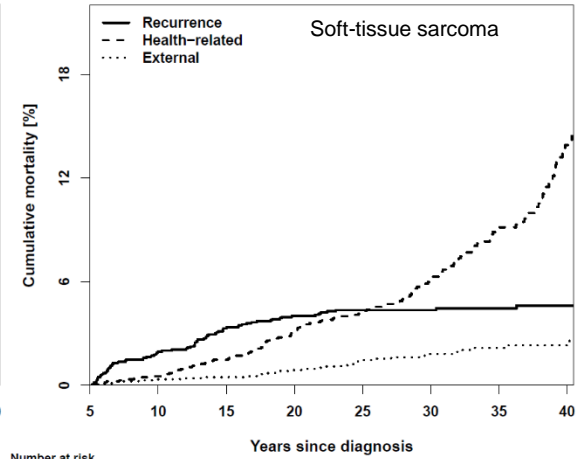

j)

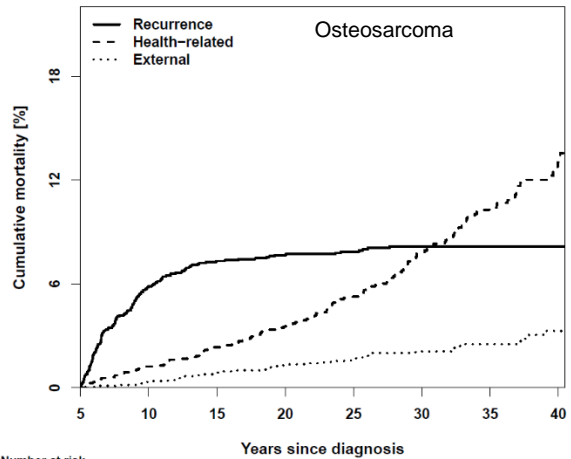

k)

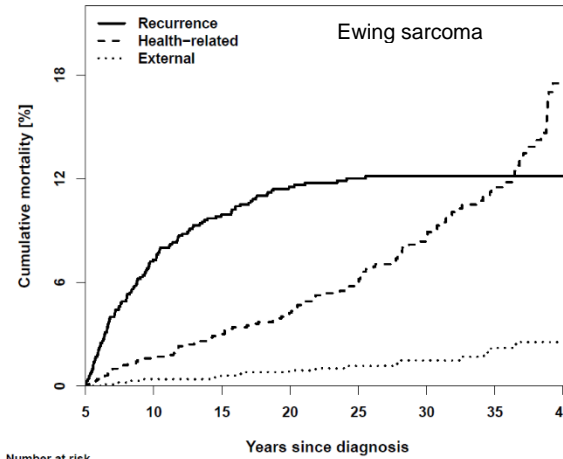

**Figure S7.** Cause specific mortality by survival time overall and by diagnosis as (a) hematologic malignancies and (b) solid tumors for six causes of death (recurrence/progression of primary cancer, subsequent neoplasm, cardiac, pulmonary, and other health-related causes, and external/accidental causes).

a)

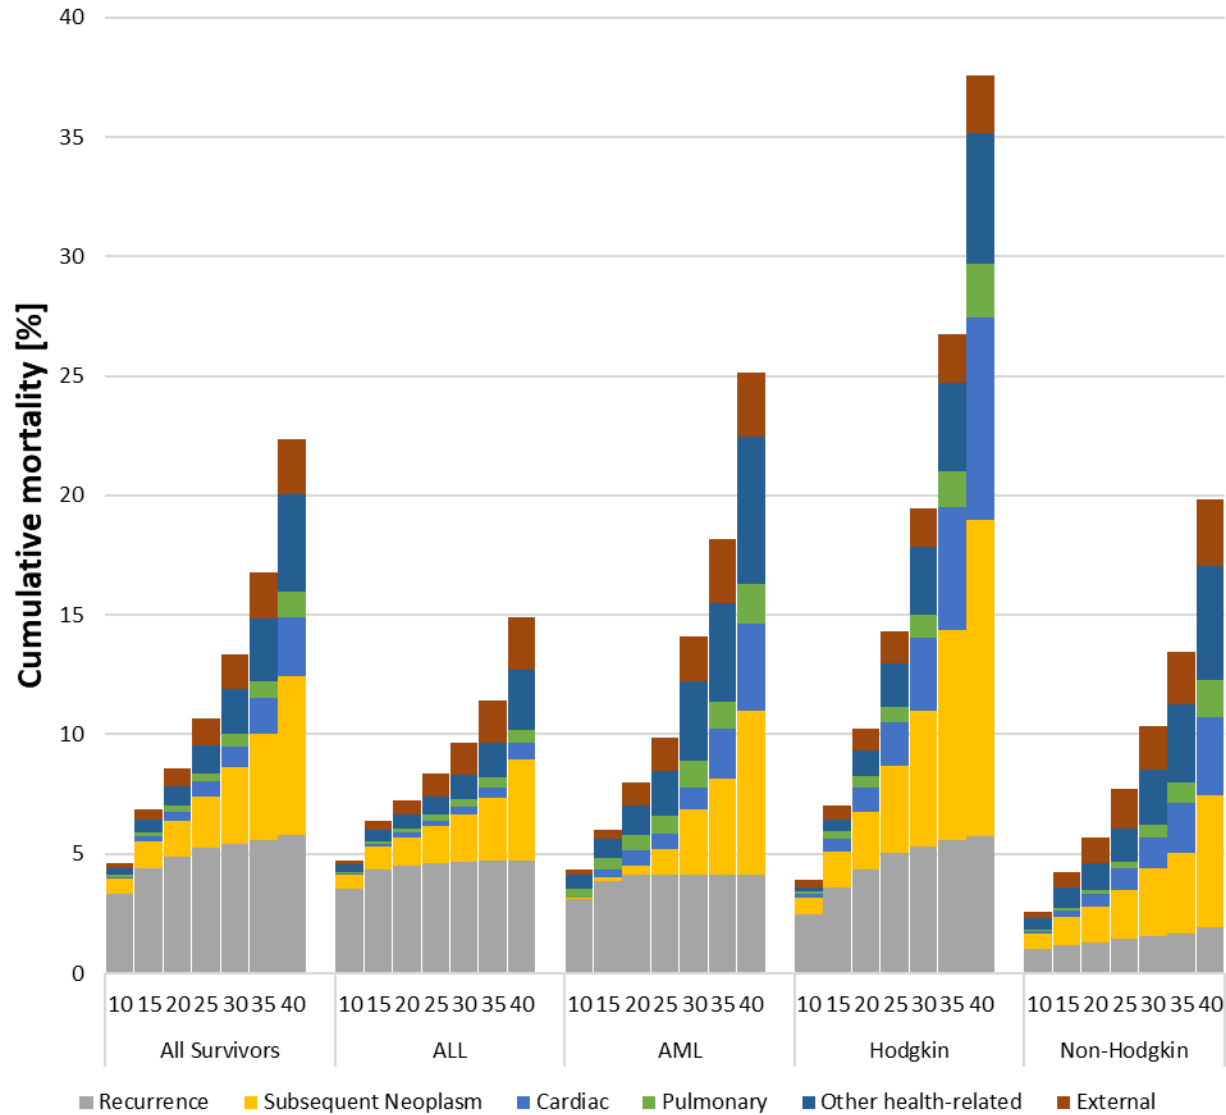

b)

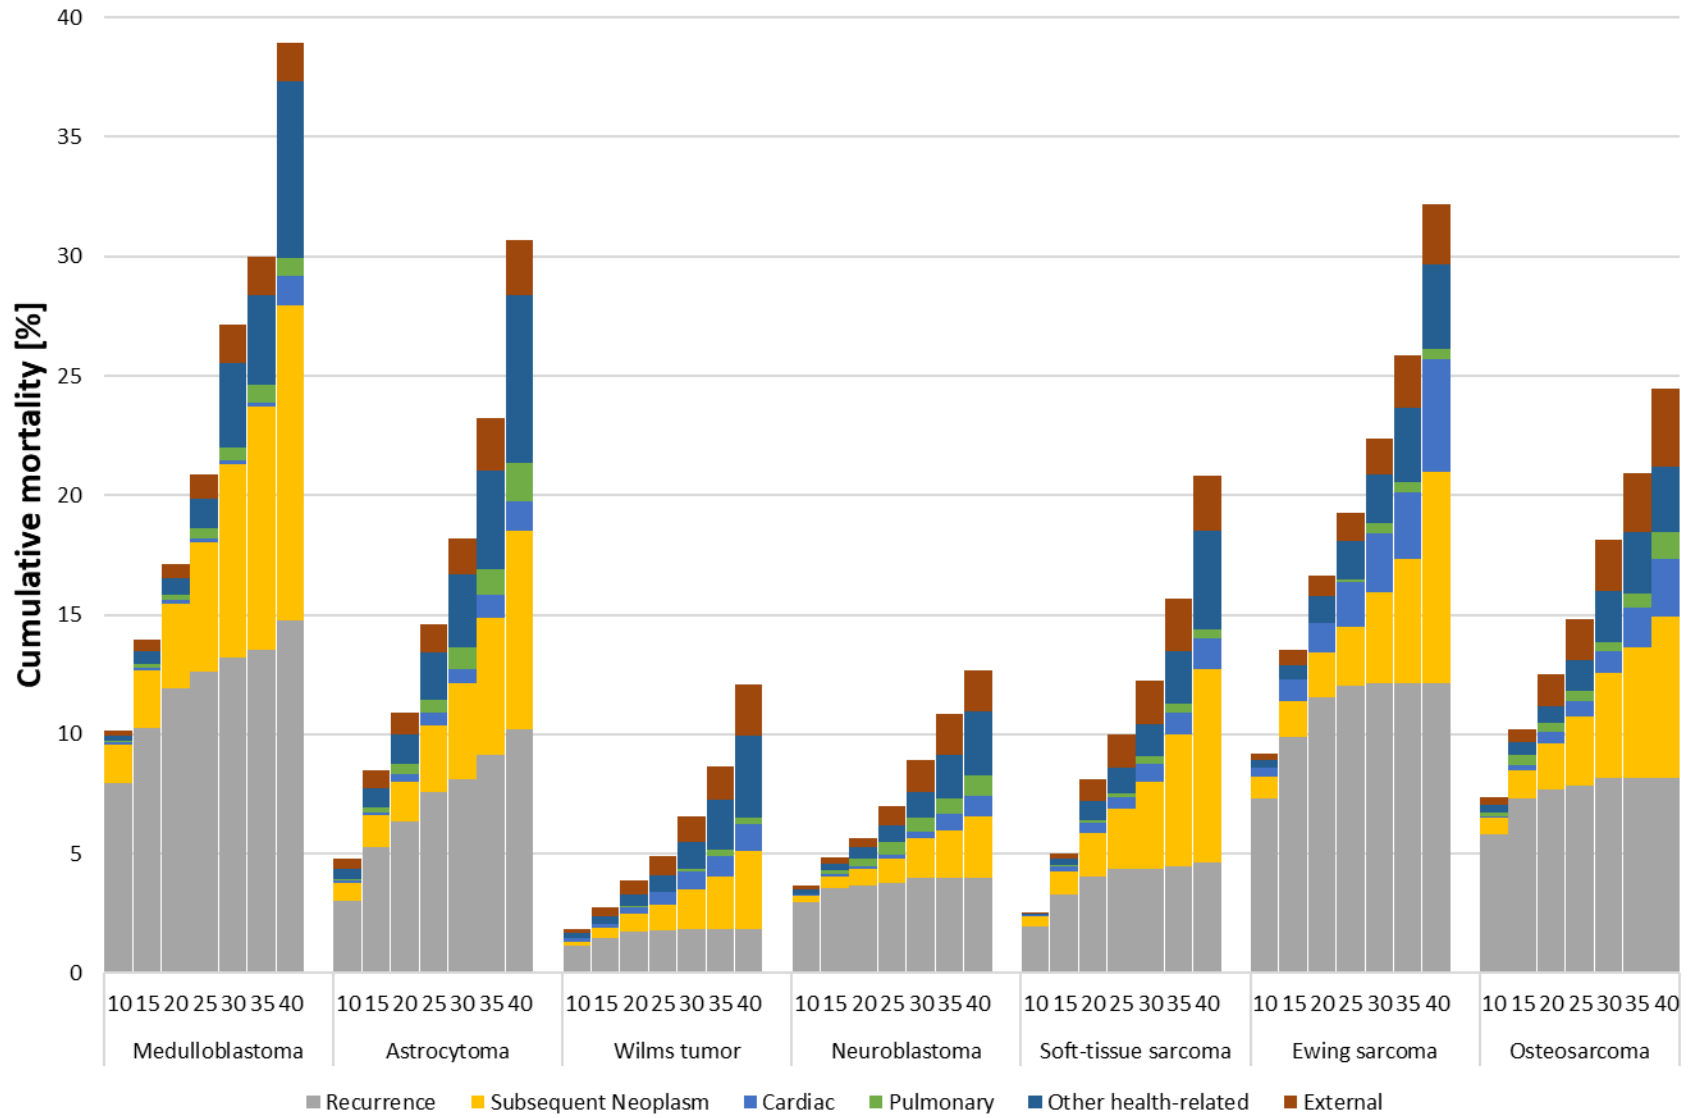

**Figure S8.** Proportion of cumulative death attributable to each of six causes (recurrence/progression of primary cancer, health-related causes of death: subsequent neoplasm, cardiac, pulmonary, and other health-related causes, and external/accidental causes) by survival time (a) overall and by diagnosis as (a) hematologic malignancies and (b) solid tumors and brain tumors showed as six causes of death. \*Note that each bar in the chart represents the proportion of all deaths occurring from five-years to assessed time-point by six causes.

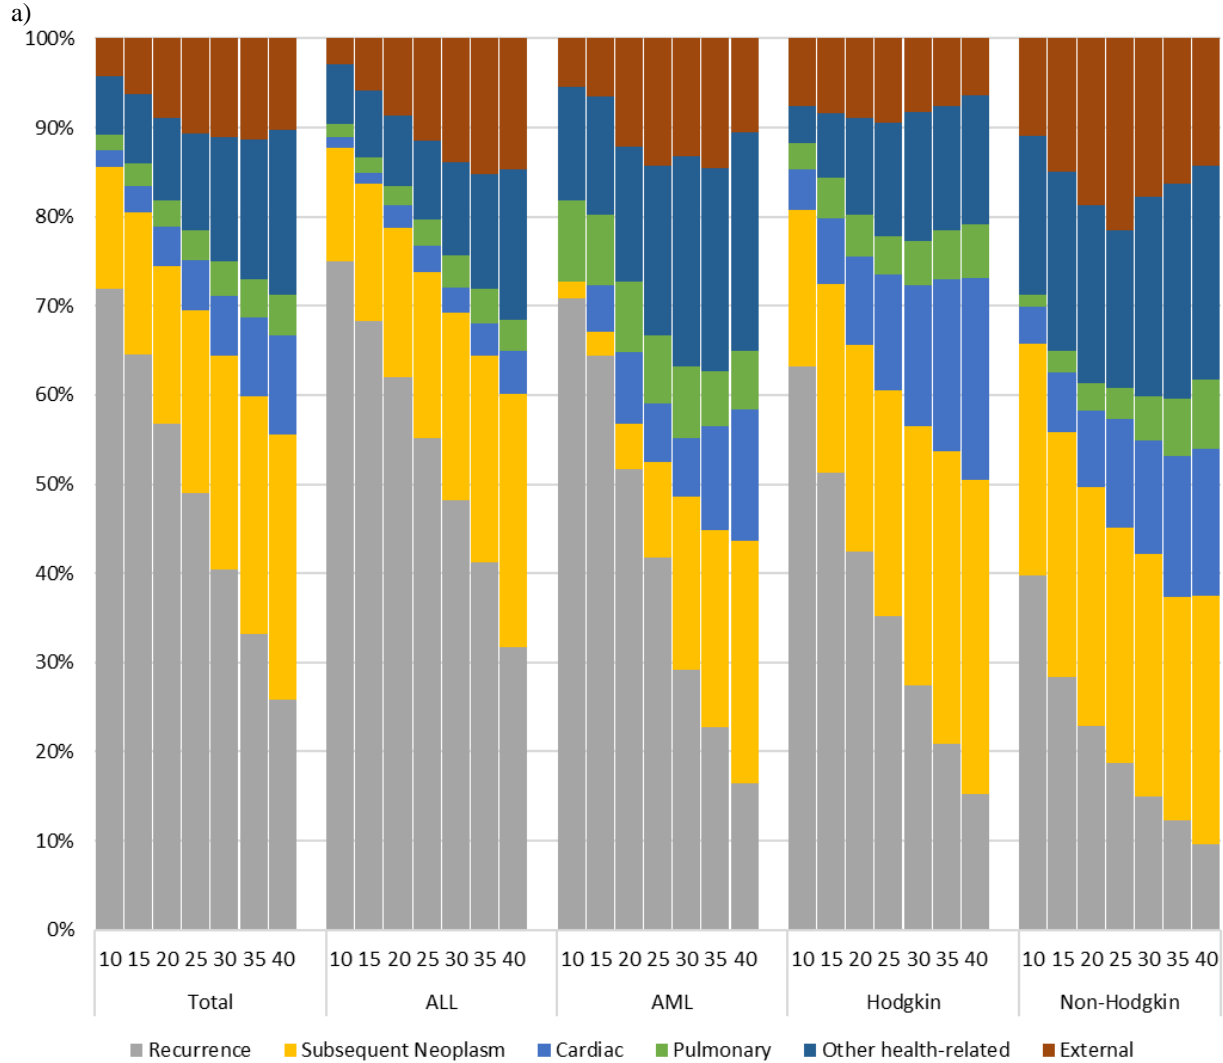

b)

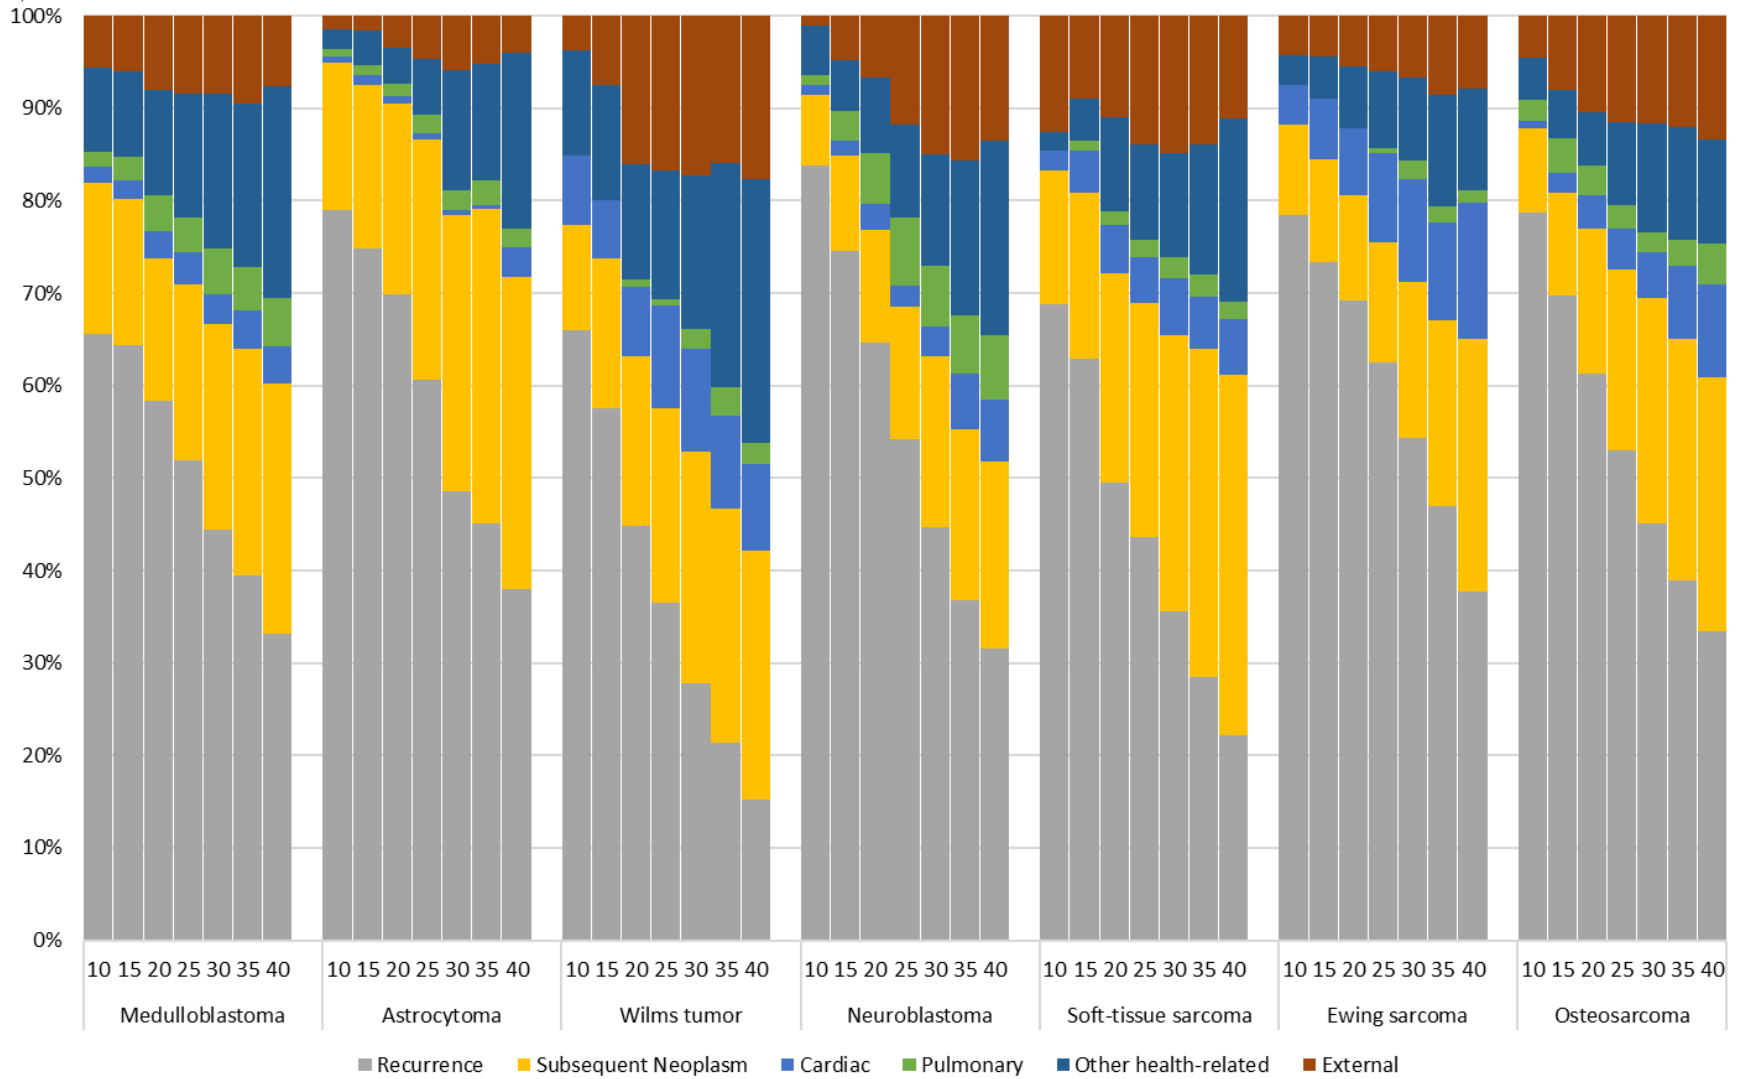

**Figure S9.** Standardized Mortality Ratios (with 95% CI) for all-cause and health-related cases of death among five-year survivors compared to the US population by time from diagnosis.

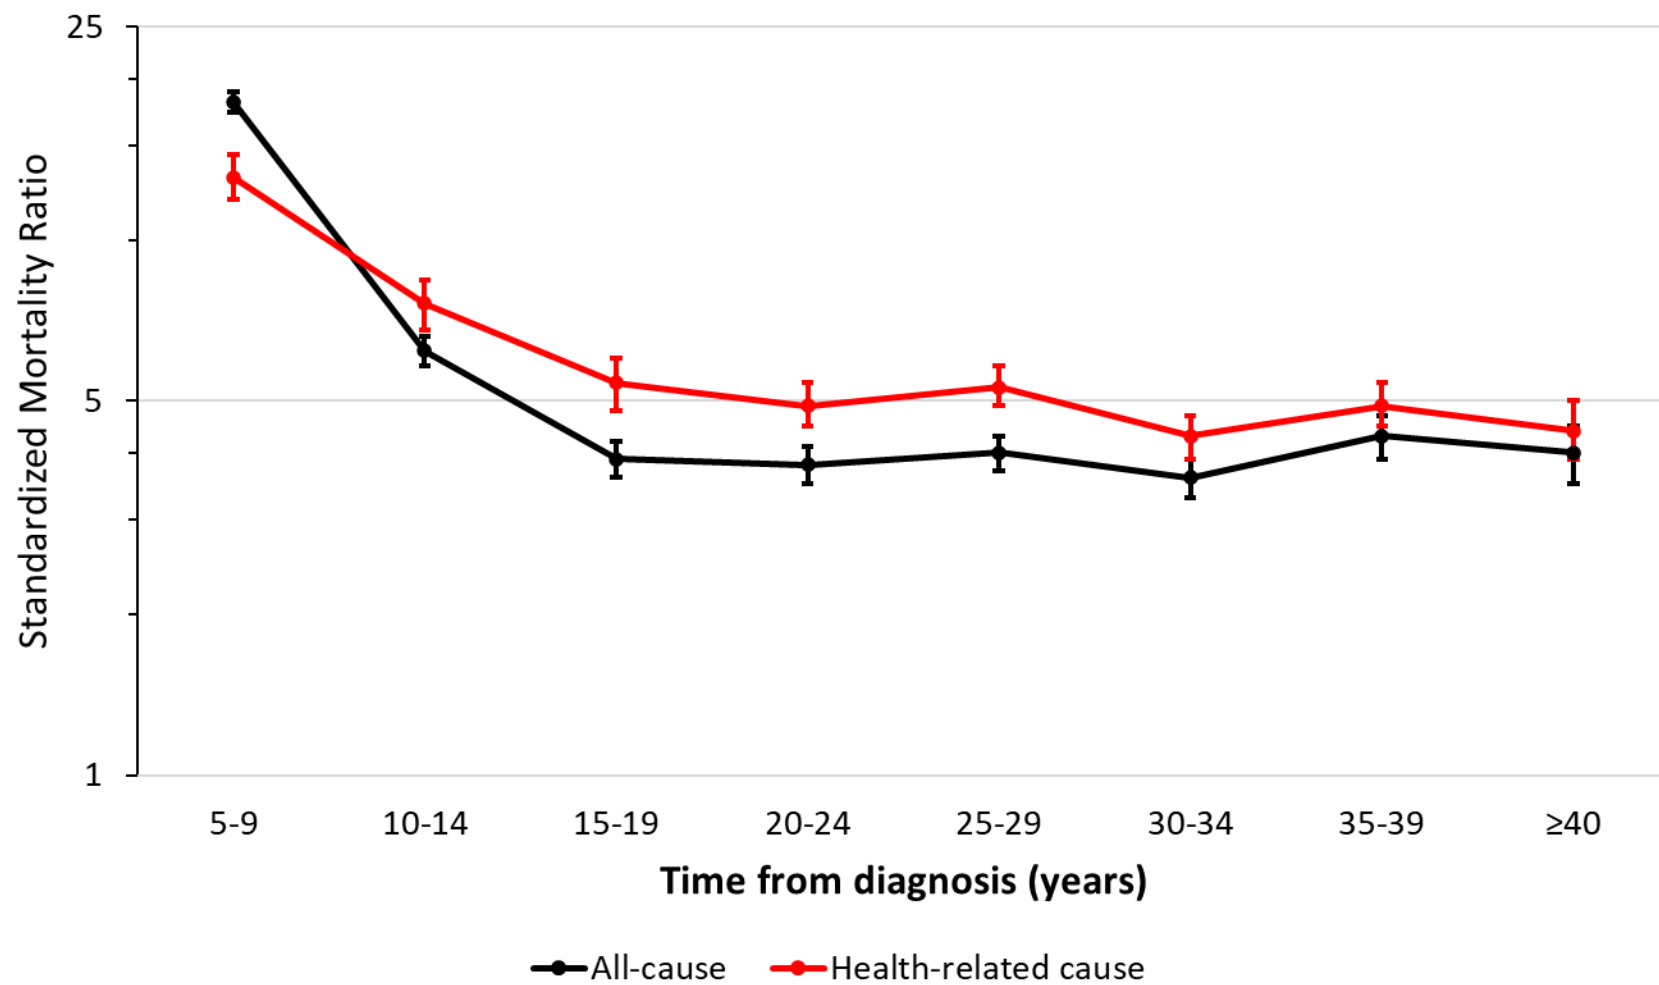

**Figure S10.** Absolute excess risk of death per 10,000 person-years by survival time among five-year survivors as cause-specific mortality by diagnosis.

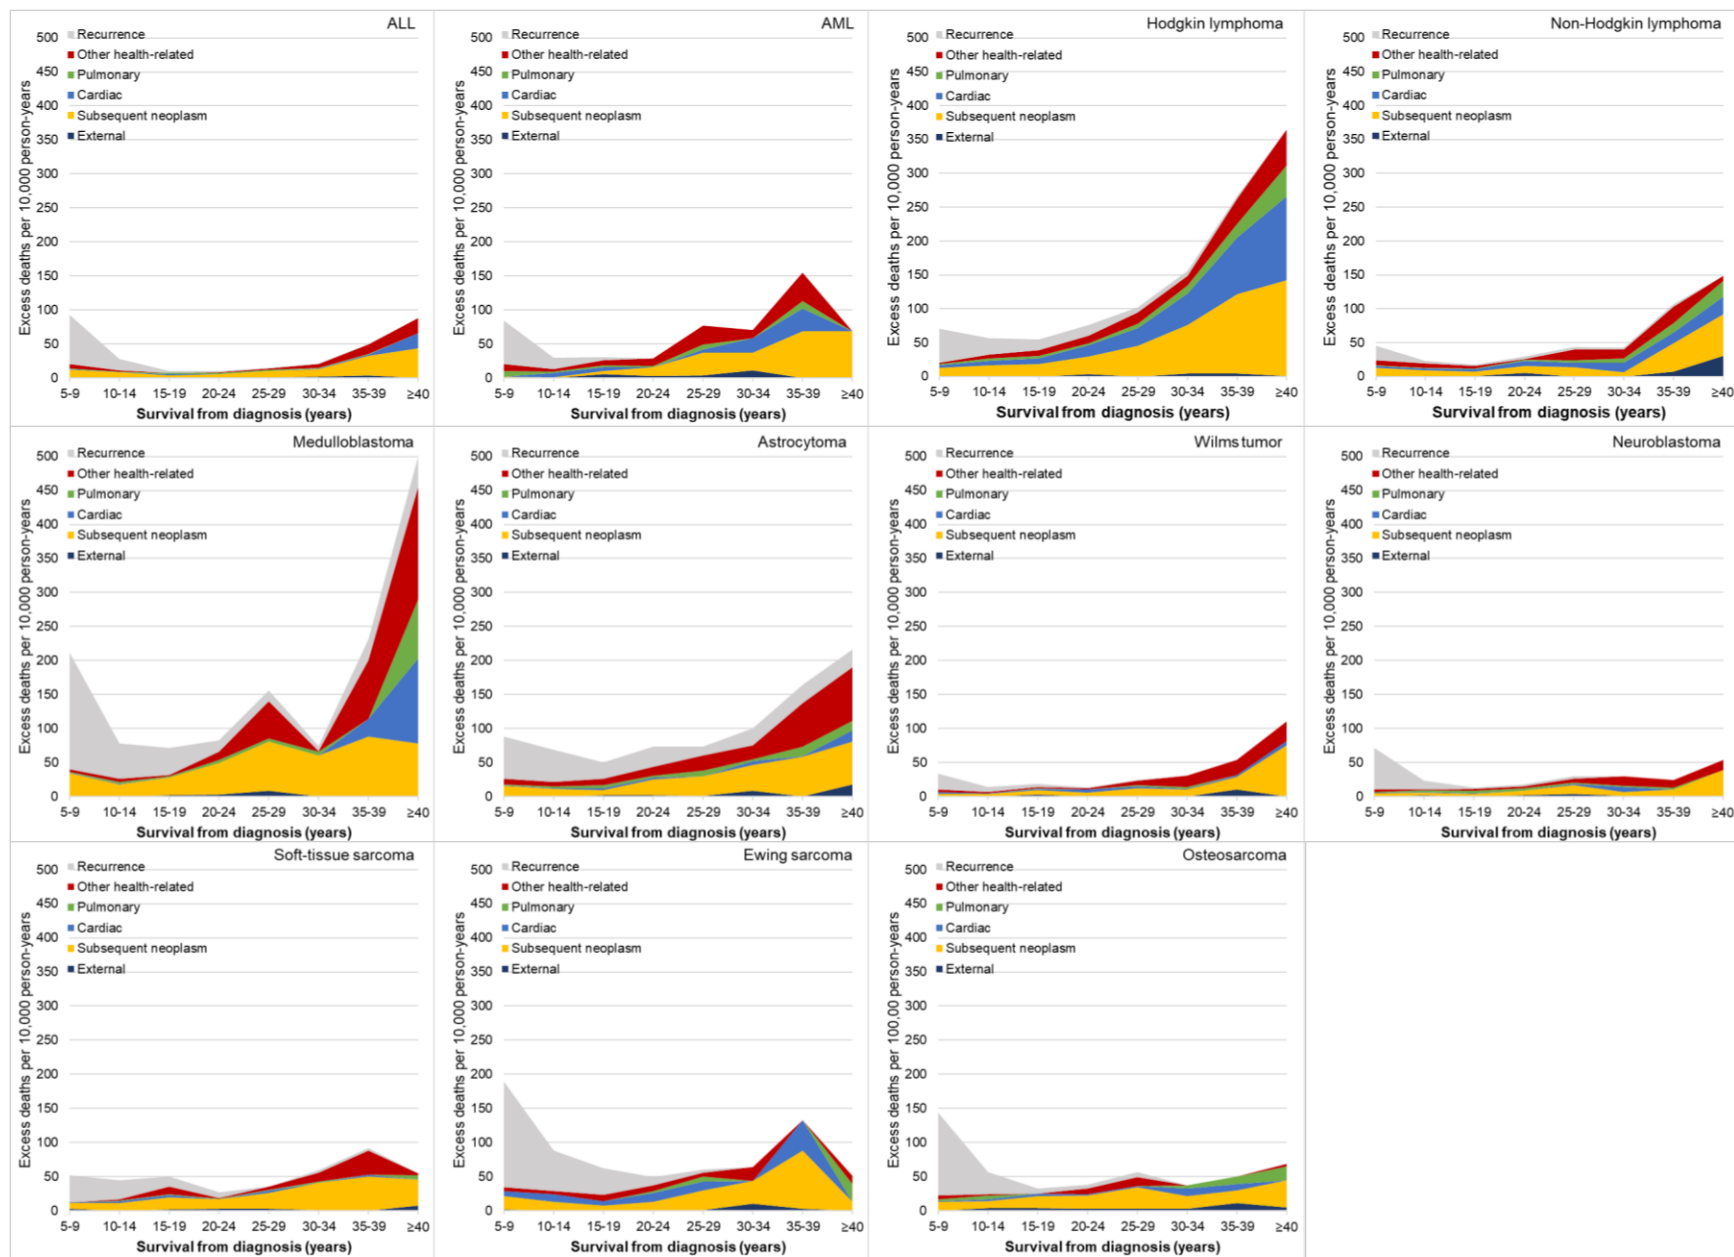



**Figure S11.** Distribution of lifestyle category and cumulative incidence of modifiable cardiovascular risk factors by age.

a)

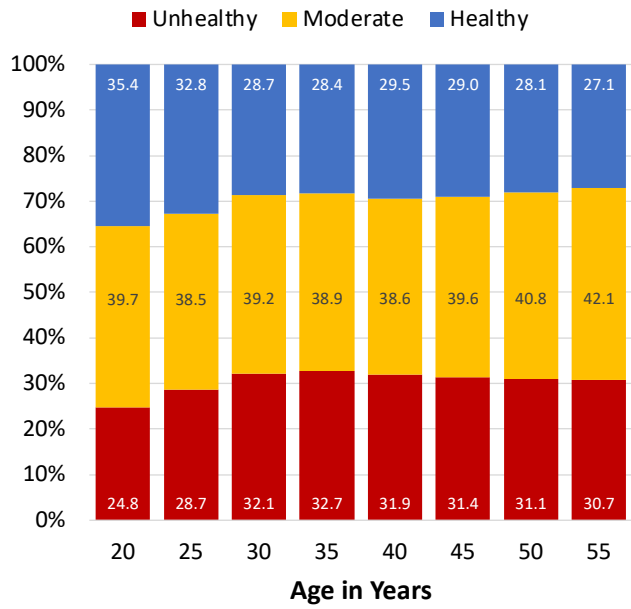

b)

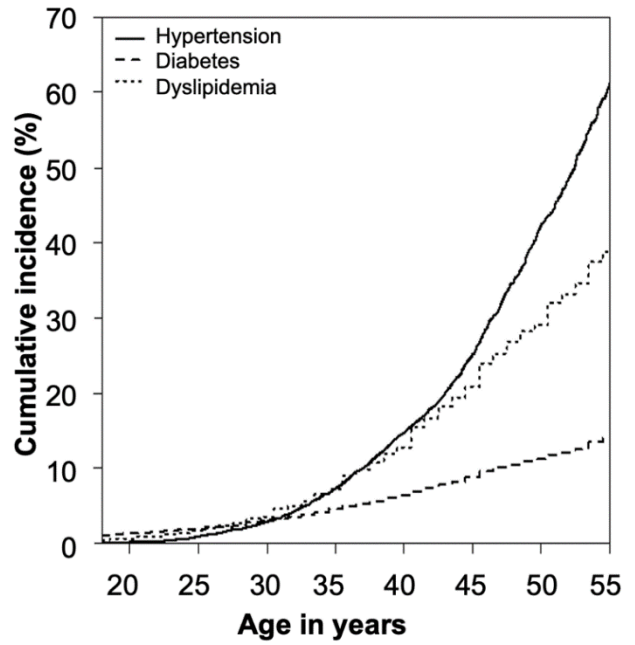

**Table S1.** Frequency of deaths by cause in the Childhood Cancer Survivor Study (all eligible) modified from the 113 selected causes of death according to the 9<sup>th</sup> and 10<sup>th</sup> revision of International Classification of Disease (ICD) codes from the National Center for Vital Statistics and Center for Disease Control.<sup>1</sup>

| Category                                            | Specific Cause of Death (subcategories)                | ICD-10 Code                                                            | ICD-9 Code                                             | N sub | N           |
|-----------------------------------------------------|--------------------------------------------------------|------------------------------------------------------------------------|--------------------------------------------------------|-------|-------------|
| <b>Primary cancer cause: recurrence/progression</b> |                                                        |                                                                        |                                                        |       | <b>2009</b> |
| <b>Second neoplasm causes</b>                       |                                                        |                                                                        |                                                        |       | <b>1458</b> |
|                                                     | <b>Oropharyngeal and gastrointestinal malignancies</b> | C00-C25                                                                | 140-157                                                |       | 212         |
|                                                     | Lip, oral cavity and pharynx                           | C00-C14                                                                | 140-149                                                | 25    |             |
|                                                     | Esophagus                                              | C15                                                                    | 150                                                    | 16    |             |
|                                                     | Stomach                                                | C16                                                                    | 151                                                    | 31    |             |
|                                                     | Small intestine                                        | C17                                                                    | 152                                                    | 6     |             |
|                                                     | Colon, rectum and anus                                 | C18-C21                                                                | 153-154                                                | 74    |             |
|                                                     | Liver and intrahepatic bile ducts                      | C22                                                                    | 155                                                    | 31    |             |
|                                                     | Pancreas                                               | C25                                                                    | 157                                                    | 26    |             |
|                                                     | Gallbladder and extrahepatic bile ducts                | C23-C24                                                                | 156                                                    | 3     |             |
|                                                     | <b>Laryngeal, tracheal and lung malignancies</b>       | C32-C34                                                                | 161-162                                                |       | 90          |
|                                                     | Larynx                                                 | C32                                                                    | 161                                                    | 2     |             |
|                                                     | Trachea, bronchus and lung                             | C33-C34                                                                | 162                                                    | 88    |             |
|                                                     | <b>Skin cancers</b>                                    | C43-C44                                                                | 172-173                                                |       | 23          |
|                                                     | Melanoma                                               | C43                                                                    | 172                                                    | 19    |             |
|                                                     | Other malignancies of the skin                         | C44                                                                    | 173                                                    | 4     |             |
|                                                     | <b>Breast cancer</b>                                   | C50                                                                    | 174-175                                                |       | 107         |
|                                                     | <b>Genitourinary malignancies</b>                      | C51-C58, C60-C68                                                       | 179-189                                                |       | 69          |
|                                                     | Cervix                                                 | C53                                                                    | 180                                                    | 5     |             |
|                                                     | Uterus                                                 | C54-C55                                                                | 179, 182                                               | 7     |             |
|                                                     | Ovary                                                  | C56                                                                    | 183.0                                                  | 9     |             |
|                                                     | Prostate                                               | C61                                                                    | 185                                                    | 5     |             |
|                                                     | Kidney and renal pelvis                                | C64-C65                                                                | 189.0, 189.1                                           | 27    |             |
|                                                     | Bladder                                                | C67                                                                    | 188                                                    | 11    |             |
|                                                     | Other reproductive or urinary tract                    | C51-C52, C57-C58, C60, C62-C63, C66, C68                               | 181, 183.2-183.9, 184, 186-187, 189.2-189.9            | 5     |             |
|                                                     | <b>CNS malignancies</b>                                | C70-C72                                                                | 191-192                                                |       | 229         |
|                                                     | <b>Bone, connective, and soft tissue malignancies</b>  | C40, C41, C49                                                          | 170-171                                                |       | 145         |
|                                                     | <b>Hodgkin lymphoma</b>                                | C81                                                                    | 201                                                    |       | 36          |
|                                                     | <b>Non-Hodgkin lymphoma</b>                            | C82-C85                                                                | 200, 202                                               |       | 62          |
|                                                     | <b>Leukemia</b>                                        | C91-C95                                                                | 204-208                                                |       | 116         |
|                                                     | <b>Benign meningioma</b>                               | D32                                                                    | 225.2, 225.4                                           |       | 21          |
|                                                     | <b>All other specified neoplasms</b>                   |                                                                        |                                                        |       | 167         |
|                                                     | All other malignant neoplasms                          | C26-C31, C37-C39, C45-C48, C69, C73-C79, C88, C90, C96 (excl 96.9) C97 | 158-160, 163-165, 173, 190, 193-198, 203, 209          | 152   |             |
|                                                     | Other neoplasms                                        | D010 D126 D180 D332 D361 D469                                          | 212.5 212.7 225.1                                      | 15    |             |
|                                                     | <b>Malignant and other neoplasms NOS</b>               |                                                                        |                                                        |       | 181         |
|                                                     | Malignant, NOS                                         | C79.9, C80, C96.9                                                      | 199, 202.9                                             | 15    |             |
|                                                     | Other neoplasms, NOS                                   | D09.9, D36.9, D37-D44, D47-48                                          | 229.9, 235-237, 238.0-238.3, 238.79, 238.8, 238.9, 239 | 166   |             |
| <b>Cardiac causes</b>                               |                                                        |                                                                        |                                                        |       | <b>504</b>  |
|                                                     | <b>Rheumatic and other valvular heart disease</b>      | I00-I09, I34-I39                                                       | 390-398, 424                                           |       | 62          |
|                                                     | <b>Hypertensive heart disease</b>                      | I11, I13                                                               | 402, 404                                               |       | 12          |
|                                                     | <b>Ischemic heart disease</b>                          | I20-I25                                                                | 410-414, 429.2, 429.7                                  |       | 182         |
|                                                     | Acute myocardial infarction                            | I21-I22                                                                | 410                                                    | 61    |             |

|                                   |                                                                                                 |                                                      |                                                             |     |            |
|-----------------------------------|-------------------------------------------------------------------------------------------------|------------------------------------------------------|-------------------------------------------------------------|-----|------------|
|                                   | Other acute and chronic ischemic heart disease                                                  | I20, I23-I25                                         | 411-414, 429.2, 429.7                                       | 121 |            |
|                                   | <b>Heart failure and cardiomyopathy</b>                                                         | I42, I43, I50                                        | 425, 428                                                    |     | 157        |
|                                   | Heart failure                                                                                   | I50                                                  | 428                                                         | 40  |            |
|                                   | Cardiomyopathy                                                                                  | I42, I43                                             | 425                                                         | 117 |            |
|                                   | <b>Cardiac arrhythmias</b>                                                                      | I47-I49                                              | 427 (excluding 427.5)                                       |     | 15         |
|                                   | <b>Other specified heart disease</b>                                                            | I26-I33, I40-I41, I44-I46, I51 (excl I51.89, I51.9)  | 415-423, 426, 427.5, 429 (excl 429.2, 429.7, 429.89, 429.9) |     | 60         |
|                                   | <b>Heart disease, NOS</b>                                                                       | I51.89, I51.9                                        | 429.89, 429.9                                               |     | 16         |
| <b>Pulmonary causes</b>           |                                                                                                 |                                                      |                                                             |     | <b>238</b> |
|                                   | <b>Influenza and pneumonia</b>                                                                  | J09-J18                                              | 480-487                                                     |     | 88         |
|                                   | Influenza                                                                                       | J09-J11                                              | 487, 488                                                    | 9   |            |
|                                   | Pneumonia                                                                                       | J12-J18                                              | 480-486                                                     | 79  |            |
|                                   | <b>Chronic lower respiratory disease, includes asthma and chronic obstructive lung diseases</b> | J40-J47                                              | 490-494, 496                                                |     | 23         |
|                                   | <b>Aspiration pneumonitis</b>                                                                   | J69                                                  | 507                                                         |     | 26         |
|                                   | <b>Interstitial lung disease, includes pulmonary fibrosis</b>                                   | J84                                                  | 515, 516                                                    |     | 50         |
|                                   | <b>Other specified respiratory diseases</b>                                                     | J00-J06, J20-J22, J30-J39, J60-J68, J70-J83, J85-J98 | 034.0, 460-478, 495, 500-506, 508-514, 517-519              |     | 51         |
| <b>Other health-related cause</b> |                                                                                                 |                                                      |                                                             |     | <b>861</b> |
|                                   | <b>Sepsis</b>                                                                                   | A40-A41                                              | 038                                                         |     | 68         |
|                                   | <b>Viral Hepatitis</b>                                                                          | B15-B19                                              | 070                                                         |     | 31         |
|                                   | <b>HIV and other infectious causes of death</b>                                                 | A00-A39, A42-A99, B00-B14, B20-B99                   | 001-037, 039-069, 071-139, 771.3                            |     | 79         |
|                                   | HIV                                                                                             | B20-B24                                              | 042-044                                                     | 25  |            |
|                                   | Other infectious causes of death                                                                | A00-A39, A42-A99, B00-B14, B25-B99                   | 001-037, 039-041, 045-069, 071-139, 771.3                   | 54  |            |
|                                   | <b>Diabetes mellitus</b>                                                                        | E10-E14                                              | 250                                                         |     | 34         |
|                                   | <b>Essential hypertension and assoc. kidney disease</b>                                         | I10, I12                                             | 401, 403                                                    |     | 10         |
|                                   | <b>Cerebrovascular disease</b>                                                                  | I60-I69                                              | 430-434, 436-438                                            |     | 100        |
|                                   | <b>Other atherosclerotic and vascular disease</b>                                               | I70, I71-I78, I80-I99                                | 440, 441-448, 451-459                                       |     | 31         |
|                                   | <b>Chronic liver disease and cirrhosis</b>                                                      | K70, K73, K74                                        | 571                                                         |     | 38         |
|                                   | Alcoholic liver disease                                                                         | K70                                                  | 571.0-571.3                                                 | 16  |            |
|                                   | Other chronic liver disease and cirrhosis                                                       | K73, K74                                             | 571.4-571.9                                                 | 22  |            |
|                                   | <b>Other diseases of the gastrointestinal system</b>                                            | K25-K28, K35-K38, K40-K46, K80-K82                   | 531-534, 540-543, 550-553, 574-575                          |     | 13         |
|                                   | <b>Kidney failure</b>                                                                           | N17-N19                                              | 584-586                                                     |     | 48         |
|                                   | <b>Complications of pregnancy, childbirth and the peripartum</b>                                | O00-O99                                              | 630-676                                                     |     | 9          |
|                                   | <b>Congenital malformations and chromosomal anomalies</b>                                       | Q00-Q99                                              | 740-759                                                     |     | 49         |
|                                   | <b>Other health-related causes</b>                                                              | Residual (all known codes not otherwise specified)   | Residual (all known codes not otherwise specified)          |     | 307        |
|                                   | <b>Ill-defined or NOS causes</b>                                                                | R00-R99                                              | 780-799                                                     |     | 44         |
| <b>External causes</b>            |                                                                                                 |                                                      |                                                             |     | <b>552</b> |
|                                   | <b>All transportation accidents</b>                                                             | V01-V99, Y85                                         | E800-E848, E929.0, E929.1                                   |     | 181        |
|                                   | <b>Falls</b>                                                                                    | W00-W19                                              | E880-E888                                                   |     | 24         |
|                                   | <b>Other accidents and sequelae</b>                                                             | W20-W99, X00-X39, X50-X59, Y86                       | E890-E929 (excl E924.1, E929.0, E929.1)                     |     | 54         |
|                                   | <b>Accidental poisoning and exposure to noxious substance</b>                                   | X40-X49                                              | E850-E868, E924.1                                           |     | 103        |
|                                   | <b>Suicide</b>                                                                                  | X60-X84, X87.0                                       | E950-E959                                                   |     | 101        |

|  |                                                   |                         |                        |    |    |
|--|---------------------------------------------------|-------------------------|------------------------|----|----|
|  | By firearm                                        | X72-X74                 | E955.0-E955.4          | 61 |    |
|  | By other method                                   | X60-X71, X75-X84, X87.0 | E950-E954, E955.5-E959 | 40 |    |
|  | <b>Homicide</b>                                   |                         |                        |    | 39 |
|  | By firearm                                        | X93-X95                 | E965.0-E965.4          | 26 |    |
|  | By other method                                   | X85-X92, X96-Y09, Y87.1 | E960-E964, E965.5-E969 | 13 |    |
|  | <b>Complications of medical and surgical care</b> | Y40-Y84, Y88            | E870-E879, E930-E949   |    | 30 |
|  | <b>Other external causes</b>                      | Y10-Y36, Y87.2, Y89     | E970-E978, E980-E999   |    | 20 |

Central nervous system (CNS); Human immunodeficiency Virus (HIV); Not otherwise specified (NOS)

**Table S2.** Cumulative incidence (%) of all-cause and cause-specific mortality at 20 years-40 years survival time by cancer diagnosis.

|                                | At risk | All-cause                           | Recurrence/<br>Progression          | External cause<br>(accident/injury) | Health-related cause                |
|--------------------------------|---------|-------------------------------------|-------------------------------------|-------------------------------------|-------------------------------------|
|                                |         | Cumulative<br>incidence<br>(95% CI) | Cumulative<br>incidence<br>(95% CI) | Cumulative<br>incidence<br>(95% CI) | Cumulative<br>incidence<br>(95% CI) |
| <b>20-years from diagnosis</b> |         |                                     |                                     |                                     |                                     |
| <b>All survivors</b>           | 28369   | 9.1 (8.8 - 9.4)                     | 4.9 (4.7 - 5.1)                     | 0.8 (0.7 - 0.8)                     | 2.9 (2.8 - 3.1)                     |
| <b>Sex</b>                     |         |                                     |                                     |                                     |                                     |
| Male                           | 15709   | 9.7 (9.3 - 10.1)                    | 5.2 (4.9 - 5.5)                     | 1.0 (0.9 - 1.1)                     | 3.0 (2.7 - 3.2)                     |
| Female                         | 12660   | 8.3 (7.9 - 8.7)                     | 4.5 (4.2 - 4.8)                     | 0.4 (0.3 - 0.5)                     | 2.9 (2.7 - 3.2)                     |
| <b>Diagnosis</b>               |         |                                     |                                     |                                     |                                     |
| Acute lymphoblastic leukemia   | 7459    | 7.6 (7.2 - 8.1)                     | 4.5 (4.2 - 4.8)                     | 0.6 (0.5 - 0.8)                     | 2.1 (1.9 - 2.4)                     |
| Acute myeloid leukemia         | 1020    | 8.8 (7.2 - 10.3)                    | 4.1 (3.0 - 5.2)                     | 1.0 (0.4 - 1.5)                     | 2.9 (2.0 - 3.8)                     |
| Other leukemia                 | 425     | 18.4 (15.2 - 21.6)                  | 11.3 (8.7 - 13.9)                   | 0.7 (0.0 - 1.4)                     | 4.1 (2.4 - 5.7)                     |
| Astrocytoma                    | 3043    | 11.6 (10.6 - 12.6)                  | 6.3 (5.6 - 7.1)                     | 0.9 (0.6 - 1.2)                     | 3.7 (3.1 - 4.3)                     |
| Medulloblastoma                | 970     | 18.2 (16.2 - 20.3)                  | 11.9 (10.2 - 13.7)                  | 0.6 (0.2 - 1.0)                     | 4.6 (3.5 - 5.7)                     |
| Other CNS tumors               | 705     | 13.5 (11.3 - 15.6)                  | 8.1 (6.4 - 9.9)                     | 0.7 (0.2 - 1.3)                     | 4.0 (2.7 - 5.2)                     |
| Hodgkin lymphoma               | 3628    | 10.9 (10.0 - 11.8)                  | 4.3 (3.7 - 5.0)                     | 0.9 (0.6 - 1.2)                     | 5.0 (4.3 - 5.6)                     |
| Non-Hodgkin lymphoma           | 2443    | 5.9 (5.0 - 6.7)                     | 1.3 (0.9 - 1.7)                     | 1.1 (0.7 - 1.4)                     | 3.3 (2.6 - 4.0)                     |
| Wilms tumor                    | 2732    | 4.1 (3.4 - 4.8)                     | 1.8 (1.3 - 2.2)                     | 0.6 (0.3 - 0.9)                     | 1.5 (1.1 - 2.0)                     |
| Neuroblastoma                  | 2240    | 5.9 (5.0 - 6.8)                     | 3.7 (2.9 - 4.4)                     | 0.4 (0.1 - 0.6)                     | 1.6 (1.1 - 2.1)                     |
| Soft tissue sarcoma            | 1456    | 8.6 (7.3 - 9.9)                     | 4.0 (3.1 - 5.0)                     | 0.9 (0.4 - 1.3)                     | 3.2 (2.4 - 4.1)                     |
| Ewing sarcoma                  | 760     | 17.6 (15.2 - 19.9)                  | 11.5 (9.5 - 13.5)                   | 0.9 (0.3 - 1.5)                     | 4.2 (3.0 - 5.5)                     |
| Osteosarcoma                   | 1438    | 13.2 (11.7 - 14.8)                  | 7.7 (6.4 - 8.9)                     | 1.3 (0.8 - 1.8)                     | 3.5 (2.7 - 4.4)                     |
| Other bone tumors              | 62      | 7.4 (1.7 - 13.1)                    | 2.5 (0.0 - 5.8)                     | 1.2 (0.0 - 3.6)                     | 3.7 (0.0 - 7.8)                     |
| <b>25-years from diagnosis</b> |         |                                     |                                     |                                     |                                     |
| <b>All survivors</b>           | 21730   | 11.3 (11.0 - 11.7)                  | 5.2 (5.0 - 5.4)                     | 1.1 (1.0 - 1.2)                     | 4.3 (4.1 - 4.5)                     |
| <b>Sex</b>                     |         |                                     |                                     |                                     |                                     |
| Male                           | 11927   | 12.2 (11.7 - 12.6)                  | 5.6 (5.3 - 5.9)                     | 1.5 (1.4 - 1.7)                     | 4.3 (4.1 - 4.6)                     |
| Female                         | 9803    | 10.3 (9.8 - 10.7)                   | 4.8 (4.5 - 5.1)                     | 0.6 (0.5 - 0.8)                     | 4.3 (4.0 - 4.6)                     |
| <b>Diagnosis</b>               |         |                                     |                                     |                                     |                                     |
| Acute lymphoblastic leukemia   | 6126    | 8.8 (8.3 - 9.3)                     | 4.6 (4.3 - 4.9)                     | 1.0 (0.8 - 1.1)                     | 2.8 (2.5 - 3.1)                     |
| Acute myeloid leukemia         | 712     | 10.7 (8.9 - 12.4)                   | 4.1 (3.0 - 5.2)                     | 1.4 (0.7 - 2.1)                     | 4.3 (3.1 - 5.5)                     |
| Other leukemia                 | 319     | 20.7 (17.3 - 24.1)                  | 11.3 (8.7 - 13.9)                   | 0.9 (0.1 - 1.7)                     | 5.9 (3.9 - 8.0)                     |
| Astrocytoma                    | 2153    | 15.5 (14.3 - 16.7)                  | 7.6 (6.7 - 8.5)                     | 1.2 (0.9 - 1.6)                     | 5.8 (5.0 - 6.6)                     |
| Medulloblastoma                | 647     | 22.1 (19.9 - 24.4)                  | 12.6 (10.8 - 14.4)                  | 1.0 (0.4 - 1.5)                     | 7.2 (5.8 - 8.7)                     |
| Other CNS tumors               | 445     | 16.8 (14.3 - 19.3)                  | 9.3 (7.4 - 11.2)                    | 0.9 (0.3 - 1.5)                     | 6.0 (4.4 - 7.6)                     |
| Hodgkin lymphoma               | 2784    | 15.4 (14.3 - 16.5)                  | 5.0 (4.4 - 5.7)                     | 1.4 (1.0 - 1.7)                     | 7.9 (7.1 - 8.8)                     |
| Non-Hodgkin lymphoma           | 1837    | 8.0 (7.0 - 9.1)                     | 1.4 (1.0 - 1.9)                     | 1.7 (1.2 - 2.1)                     | 4.6 (3.8 - 5.4)                     |
| Wilms tumor                    | 2119    | 5.3 (4.5 - 6.1)                     | 1.8 (1.3 - 2.3)                     | 0.8 (0.5 - 1.2)                     | 2.3 (1.8 - 2.9)                     |
| Neuroblastoma                  | 1692    | 7.3 (6.3 - 8.4)                     | 3.8 (3.1 - 4.5)                     | 0.8 (0.4 - 1.2)                     | 2.4 (1.8 - 3.0)                     |
| Soft tissue sarcoma            | 1159    | 10.7 (9.2 - 12.2)                   | 4.4 (3.4 - 5.3)                     | 1.4 (0.8 - 2.0)                     | 4.2 (3.3 - 5.2)                     |
| Ewing sarcoma                  | 570     | 20.1 (17.6 - 22.7)                  | 12.0 (10.0 - 14.0)                  | 1.2 (0.5 - 1.8)                     | 6.1 (4.5 - 7.6)                     |
| Osteosarcoma                   | 1154    | 15.7 (14.0 - 17.4)                  | 7.9 (6.6 - 9.1)                     | 1.7 (1.1 - 2.3)                     | 5.3 (4.2 - 6.3)                     |
| Other bone tumors              | 26      | 12.6 (3.8 - 21.5)                   | 2.5 (0.0 - 5.8)                     | 1.2 (0.0 - 3.6)                     | 8.9 (0.9 - 17.0)                    |
| <b>30-years from diagnosis</b> |         |                                     |                                     |                                     |                                     |
| <b>All survivors</b>           | 16139   | 14.2 (13.8 - 14.6)                  | 5.4 (5.2 - 5.6)                     | 1.5 (1.4 - 1.6)                     | 6.5 (6.2 - 6.8)                     |
| <b>Sex</b>                     |         |                                     |                                     |                                     |                                     |
| Male                           | 8797    | 15.2 (14.6 - 15.7)                  | 5.8 (5.5 - 6.1)                     | 2.0 (1.8 - 2.2)                     | 6.4 (6.1 - 6.8)                     |
| Female                         | 7343    | 13.0 (12.4 - 13.5)                  | 4.9 (4.6 - 5.2)                     | 0.8 (0.7 - 0.9)                     | 6.5 (6.1 - 7.0)                     |
| <b>Diagnosis</b>               |         |                                     |                                     |                                     |                                     |
| Acute lymphoblastic leukemia   | 5062    | 10.2 (9.7 - 10.8)                   | 4.6 (4.3 - 5.0)                     | 1.3 (1.1 - 1.6)                     | 3.6 (3.3 - 4.0)                     |
| Acute myeloid leukemia         | 432     | 15.0 (12.7 - 17.4)                  | 4.1 (3.0 - 5.2)                     | 1.9 (1.0 - 2.7)                     | 8.1 (6.2 - 10.0)                    |
| Other leukemia                 | 228     | 23.6 (19.9 - 27.3)                  | 11.6 (8.9 - 14.2)                   | 0.9 (0.1 - 1.7)                     | 8.3 (5.7 - 10.9)                    |
| Astrocytoma                    | 1369    | 19.3 (17.9 - 20.7)                  | 8.1 (7.2 - 9.0)                     | 1.5 (1.1 - 2.0)                     | 8.6 (7.5 - 9.6)                     |
| Medulloblastoma                | 374     | 28.4 (25.7 - 31.2)                  | 13.2 (11.3 - 15.0)                  | 1.6 (0.8 - 2.4)                     | 12.4 (10.2 - 14.5)                  |
| Other CNS tumors               | 260     | 21.1 (18.0 - 24.1)                  | 9.5 (7.6 - 11.4)                    | 1.4 (0.5 - 2.4)                     | 9.5 (7.2 - 11.9)                    |
| Hodgkin lymphoma               | 2096    | 20.8 (19.4 - 22.1)                  | 5.3 (4.6 - 6.0)                     | 1.6 (1.2 - 2.0)                     | 12.5 (11.4 - 13.6)                  |
| Non-Hodgkin lymphoma           | 1315    | 10.9 (9.6 - 12.2)                   | 1.5 (1.1 - 2.0)                     | 1.8 (1.3 - 2.4)                     | 7.0 (5.9 - 8.0)                     |
| Wilms tumor                    | 1588    | 7.0 (6.1 - 8.0)                     | 1.8 (1.4 - 2.3)                     | 1.1 (0.7 - 1.6)                     | 3.6 (2.9 - 4.4)                     |
| Neuroblastoma                  | 1228    | 9.3 (8.1 - 10.6)                    | 4.0 (3.2 - 4.8)                     | 1.3 (0.8 - 1.9)                     | 3.6 (2.8 - 4.4)                     |
| Soft tissue sarcoma            | 884     | 13.3 (11.6 - 15.0)                  | 4.4 (3.4 - 5.3)                     | 1.8 (1.1 - 2.5)                     | 6.1 (4.8 - 7.3)                     |
| Ewing sarcoma                  | 417     | 23.9 (21.0 - 26.7)                  | 12.2 (10.1 - 14.2)                  | 1.5 (0.7 - 2.3)                     | 8.7 (6.8 - 10.7)                    |
| Osteosarcoma                   | 885     | 19.1 (17.1 - 21.0)                  | 8.2 (6.9 - 9.5)                     | 2.1 (1.4 - 2.8)                     | 7.8 (6.5 - 9.2)                     |

|                                |      |                    |                    |                 |                    |
|--------------------------------|------|--------------------|--------------------|-----------------|--------------------|
| Other bone tumors              | 14   | 12.6 (3.8 - 21.5)  | 2.5 (0.0 - 5.8)    | 1.2 (0.0 - 3.6) | 8.9 (0.9 - 17.0)   |
| <b>35-years from diagnosis</b> |      |                    |                    |                 |                    |
| <b>All survivors</b>           | 9924 | 17.7 (17.2 - 18.1) | 5.6 (5.3 - 5.8)    | 1.9 (1.7 - 2.1) | 9.3 (8.9 - 9.7)    |
| <b>Sex</b>                     |      |                    |                    |                 |                    |
| Male                           | 5388 | 18.9 (18.3 - 19.6) | 6.0 (5.6 - 6.3)    | 2.6 (2.3 - 2.8) | 9.4 (8.9 - 9.9)    |
| Female                         | 4536 | 16.1 (15.5 - 16.8) | 5.1 (4.7 - 5.4)    | 1.1 (0.9 - 1.2) | 9.1 (8.6 - 9.7)    |
| <b>Diagnosis</b>               |      |                    |                    |                 |                    |
| Acute lymphoblastic leukemia   | 3095 | 12.1 (11.4 - 12.7) | 4.7 (4.3 - 5.0)    | 1.7 (1.4 - 2.0) | 5.0 (4.5 - 5.5)    |
| Acute myeloid leukemia         | 238  | 19.3 (16.3 - 22.4) | 4.1 (3.0 - 5.2)    | 2.7 (1.4 - 3.9) | 11.4 (8.8 - 14.0)  |
| Other leukemia                 | 141  | 27.6 (23.3 - 32.0) | 11.6 (8.9 - 14.2)  | 0.9 (0.1 - 1.7) | 11.9 (8.5 - 15.3)  |
| Astrocytoma                    | 713  | 24.3 (22.6 - 26.1) | 9.2 (8.1 - 10.2)   | 2.2 (1.6 - 2.8) | 11.9 (10.5 - 13.2) |
| Medulloblastoma                | 197  | 31.6 (28.5 - 34.8) | 13.5 (11.6 - 15.5) | 1.6 (0.8 - 2.4) | 14.9 (12.3 - 17.4) |
| Other CNS tumors               | 130  | 26.4 (22.5 - 30.4) | 9.8 (7.8 - 11.8)   | 2.2 (0.7 - 3.7) | 13.8 (10.4 - 17.1) |
| Hodgkin lymphoma               | 1385 | 28.3 (26.7 - 30.0) | 5.6 (4.9 - 6.3)    | 2.0 (1.5 - 2.5) | 19.1 (17.7 - 20.6) |
| Non-Hodgkin lymphoma           | 761  | 14.1 (12.5 - 15.7) | 1.7 (1.1 - 2.2)    | 2.2 (1.6 - 2.8) | 9.6 (8.2 - 11.0)   |
| Wilms tumor                    | 1014 | 9.1 (7.9 - 10.4)   | 1.8 (1.4 - 2.3)    | 1.4 (0.9 - 1.9) | 5.4 (4.4 - 6.4)    |
| Neuroblastoma                  | 799  | 11.2 (9.8 - 12.7)  | 4.0 (3.2 - 4.8)    | 1.7 (1.1 - 2.3) | 5.1 (4.1 - 6.2)    |
| Soft tissue sarcoma            | 592  | 16.8 (14.7 - 18.8) | 4.5 (3.5 - 5.5)    | 2.2 (1.4 - 3.0) | 9.0 (7.4 - 10.7)   |
| Ewing sarcoma                  | 266  | 27.4 (24.2 - 30.6) | 12.2 (10.1 - 14.2) | 2.2 (1.1 - 3.4) | 11.5 (9.1 - 13.9)  |
| Osteosarcoma                   | 596  | 21.9 (19.8 - 24.1) | 8.2 (6.9 - 9.5)    | 2.5 (1.7 - 3.3) | 10.3 (8.6 - 11.9)  |
| Other bone tumors              | 9    | 22.3 (2.7 - 41.9)  | 2.5 (0.0 - 5.8)    | 1.2 (0.0 - 3.6) | 18.6 (0.0 - 38.0)  |
| <b>40-years from diagnosis</b> |      |                    |                    |                 |                    |
| <b>All survivors</b>           | 4550 | 23.3 (22.7 - 24.0) | 5.8 (5.5 - 6.0)    | 2.3 (2.1 - 2.5) | 14.3 (13.7 - 14.9) |
| <b>Sex</b>                     |      |                    |                    |                 |                    |
| Male                           | 2433 | 24.5 (23.6 - 25.4) | 6.2 (5.9 - 6.6)    | 3.0 (2.7 - 3.3) | 14.2 (13.4 - 15.0) |
| Female                         | 2119 | 21.9 (20.9 - 22.9) | 5.2 (4.8 - 5.5)    | 1.4 (1.1 - 1.7) | 14.4 (13.5 - 15.3) |
| <b>Diagnosis</b>               |      |                    |                    |                 |                    |
| Acute lymphoblastic leukemia   | 1414 | 15.6 (14.6 - 16.6) | 4.7 (4.4 - 5.1)    | 2.2 (1.8 - 2.6) | 8.0 (7.1 - 8.8)    |
| Acute myeloid leukemia         | 82   | 26.3 (21.7 - 30.9) | 4.1 (3.0 - 5.2)    | 2.7 (1.4 - 3.9) | 18.3 (14.0 - 22.7) |
| Other leukemia                 | 78   | 28.9 (24.3 - 33.5) | 11.6 (8.9 - 14.2)  | 0.9 (0.1 - 1.7) | 13.2 (9.4 - 17.0)  |
| Astrocytoma                    | 331  | 31.8 (29.3 - 34.4) | 10.2 (8.9 - 11.5)  | 2.3 (1.7 - 3.0) | 18.2 (15.9 - 20.4) |
| Medulloblastoma                | 69   | 40.6 (35.5 - 45.7) | 14.8 (12.2 - 17.4) | 1.6 (0.8 - 2.4) | 22.6 (17.9 - 27.2) |
| Other CNS tumors               | 50   | 37.8 (31.2 - 44.3) | 11.6 (8.4 - 14.8)  | 4.3 (1.1 - 7.4) | 21.3 (15.8 - 26.7) |
| Hodgkin lymphoma               | 653  | 39.2 (37.1 - 41.3) | 5.7 (5.0 - 6.5)    | 2.4 (1.8 - 2.9) | 29.4 (27.4 - 31.4) |
| Non-Hodgkin lymphoma           | 281  | 20.7 (18.1 - 23.2) | 1.9 (1.2 - 2.6)    | 2.8 (1.9 - 3.7) | 15.1 (12.8 - 17.4) |
| Wilms tumor                    | 480  | 12.6 (10.8 - 14.3) | 1.8 (1.4 - 2.3)    | 2.1 (1.4 - 2.9) | 8.1 (6.6 - 9.7)    |
| Neuroblastoma                  | 399  | 13.1 (11.3 - 14.8) | 4.0 (3.2 - 4.8)    | 1.7 (1.1 - 2.3) | 7.0 (5.5 - 8.5)    |
| Soft tissue sarcoma            | 322  | 22.0 (19.3 - 24.7) | 4.6 (3.6 - 5.7)    | 2.3 (1.5 - 3.2) | 13.9 (11.5 - 16.4) |
| Ewing sarcoma                  | 115  | 33.7 (29.5 - 37.9) | 12.2 (10.1 - 14.2) | 2.5 (1.2 - 3.9) | 17.5 (13.8 - 21.2) |
| Osteosarcoma                   | 282  | 25.4 (22.8 - 28.0) | 8.2 (6.9 - 9.5)    | 3.3 (2.2 - 4.4) | 13.0 (10.9 - 15.2) |
| Other bone tumors              | 7    | 22.3 (2.7 - 41.9)  | 2.5 (0.0 - 5.8)    | 1.2 (0.0 - 3.6) | 18.6 (0.0 - 38.0)  |

**Table S2 continued.** Cumulative incidence (%) of all-cause and cause-specific mortality at 20 years-40 years survival time by cancer diagnosis.

|                                | Health-related causes of death |                               |                               |                               |                               |
|--------------------------------|--------------------------------|-------------------------------|-------------------------------|-------------------------------|-------------------------------|
|                                | At risk                        | Subsequent neoplasm           | Cardiac                       | Pulmonary                     | Other                         |
|                                |                                | Cumulative incidence (95% CI) |
| <b>20-years from diagnosis</b> |                                |                               |                               |                               |                               |
| <b>All survivors</b>           | 28369                          | 1.5 (1.4 - 1.6)               | 0.4 (0.3 - 0.4)               | 0.3 (0.2 - 0.3)               | 0.8 (0.7 - 0.9)               |
| <b>Sex</b>                     |                                |                               |                               |                               |                               |
| Male                           | 15709                          | 1.5 (1.3 - 1.7)               | 0.4 (0.3 - 0.5)               | 0.3 (0.2 - 0.3)               | 0.8 (0.7 - 0.9)               |
| Female                         | 12660                          | 1.5 (1.3 - 1.7)               | 0.3 (0.2 - 0.4)               | 0.3 (0.2 - 0.3)               | 0.8 (0.7 - 1.0)               |
| <b>Diagnosis</b>               |                                |                               |                               |                               |                               |
| Acute lymphoblastic leukemia   | 7459                           | 1.2 (1.0 - 1.4)               | 0.2 (0.1 - 0.3)               | 0.2 (0.1 - 0.2)               | 0.6 (0.4 - 0.7)               |
| Acute myeloid leukemia         | 1020                           | 0.4 (0.1 - 0.8)               | 0.6 (0.2 - 1.1)               | 0.6 (0.2 - 1.1)               | 1.2 (0.6 - 1.8)               |
| Other leukemia                 | 425                            | 1.4 (0.4 - 2.4)               | 0.5 (0.0 - 1.1)               | 0.9 (0.1 - 1.7)               | 1.2 (0.3 - 2.2)               |
| Astrocytoma                    | 3043                           | 1.7 (1.3 - 2.1)               | 0.3 (0.1 - 0.5)               | 0.4 (0.2 - 0.6)               | 1.2 (0.9 - 1.6)               |
| Medulloblastoma                | 970                            | 3.5 (2.6 - 4.5)               | 0.1 (0.0 - 0.3)               | 0.2 (0.0 - 0.5)               | 0.7 (0.2 - 1.1)               |
| Other CNS tumors               | 705                            | 2.7 (1.7 - 3.8)               | 0.0 (0.0 - 0.4)               | 0.1 (0.0 - 0.3)               | 1.2 (0.5 - 1.8)               |
| Hodgkin lymphoma               | 3628                           | 2.4 (1.9 - 2.8)               | 1.0 (0.7 - 1.3)               | 0.5 (0.3 - 0.7)               | 1.1 (0.8 - 1.4)               |
| Non-Hodgkin lymphoma           | 2443                           | 1.5 (1.1 - 2.0)               | 0.5 (0.2 - 0.7)               | 0.2 (0.0 - 0.3)               | 1.1 (0.7 - 1.5)               |
| Wilms tumor                    | 2732                           | 0.7 (0.4 - 1.0)               | 0.3 (0.1 - 0.5)               | 0.0 (0.0 - 0.1)               | 0.5 (0.2 - 0.7)               |
| Neuroblastoma                  | 2240                           | 0.7 (0.4 - 1.0)               | 0.2 (0.0 - 0.3)               | 0.3 (0.1 - 0.5)               | 0.5 (0.2 - 0.7)               |
| Soft tissue sarcoma            | 1456                           | 1.8 (1.2 - 2.5)               | 0.4 (0.1 - 0.7)               | 0.1 (0.0 - 0.3)               | 0.8 (0.4 - 1.3)               |
| Ewing sarcoma                  | 760                            | 1.9 (1.1 - 2.8)               | 1.2 (0.5 - 1.9)               | 0.0 (0.0 - 0.4)               | 1.1 (0.5 - 1.8)               |
| Osteosarcoma                   | 1438                           | 2.0 (1.3 - 2.6)               | 0.5 (0.1 - 0.8)               | 0.4 (0.1 - 0.7)               | 0.7 (0.3 - 1.1)               |
| Other bone tumors              | 62                             | 2.5 (0.0 - 5.8)               | 0.0 (0.0 - 5.3)               | 1.2 (0.0 - 3.6)               | 0.0 (0.0 - 5.3)               |
| <b>25-years from diagnosis</b> |                                |                               |                               |                               |                               |
| <b>All survivors</b>           | 21730                          | 2.2 (2.0 - 2.3)               | 0.6 (0.5 - 0.7)               | 0.4 (0.3 - 0.4)               | 1.2 (1.1 - 1.3)               |
| <b>Sex</b>                     |                                |                               |                               |                               |                               |
| Male                           | 11927                          | 2.1 (1.9 - 2.3)               | 0.7 (0.6 - 0.8)               | 0.4 (0.3 - 0.4)               | 1.2 (1.0 - 1.3)               |
| Female                         | 9803                           | 2.2 (2.0 - 2.5)               | 0.5 (0.4 - 0.6)               | 0.4 (0.3 - 0.4)               | 1.2 (1.0 - 1.3)               |
| <b>Diagnosis</b>               |                                |                               |                               |                               |                               |
| Acute lymphoblastic leukemia   | 6126                           | 1.6 (1.3 - 1.8)               | 0.2 (0.2 - 0.3)               | 0.2 (0.2 - 0.3)               | 0.7 (0.6 - 0.9)               |
| Acute myeloid leukemia         | 712                            | 1.1 (0.4 - 1.7)               | 0.6 (0.2 - 1.1)               | 0.8 (0.3 - 1.3)               | 1.9 (1.1 - 2.7)               |
| Other leukemia                 | 319                            | 2.8 (1.3 - 4.3)               | 0.5 (0.0 - 1.1)               | 1.1 (0.2 - 2.0)               | 1.5 (0.5 - 2.5)               |
| Astrocytoma                    | 2153                           | 2.8 (2.2 - 3.3)               | 0.5 (0.3 - 0.7)               | 0.6 (0.3 - 0.8)               | 2.0 (1.5 - 2.4)               |
| Medulloblastoma                | 647                            | 5.4 (4.1 - 6.7)               | 0.1 (0.0 - 0.3)               | 0.4 (0.0 - 0.8)               | 1.3 (0.6 - 1.9)               |
| Other CNS tumors               | 445                            | 3.7 (2.5 - 5.0)               | 0.3 (0.0 - 0.7)               | 0.1 (0.0 - 0.3)               | 1.9 (1.0 - 2.8)               |
| Hodgkin lymphoma               | 2784                           | 3.6 (3.1 - 4.2)               | 1.9 (1.4 - 2.3)               | 0.6 (0.4 - 0.9)               | 1.8 (1.4 - 2.2)               |
| Non-Hodgkin lymphoma           | 1837                           | 2.0 (1.5 - 2.6)               | 0.9 (0.6 - 1.3)               | 0.3 (0.1 - 0.5)               | 1.4 (0.9 - 1.8)               |
| Wilms tumor                    | 2119                           | 1.0 (0.7 - 1.4)               | 0.5 (0.3 - 0.8)               | 0.0 (0.0 - 0.1)               | 0.7 (0.4 - 1.0)               |
| Neuroblastoma                  | 1692                           | 1.0 (0.6 - 1.4)               | 0.2 (0.0 - 0.3)               | 0.5 (0.2 - 0.8)               | 0.7 (0.4 - 1.0)               |
| Soft tissue sarcoma            | 1159                           | 2.5 (1.8 - 3.3)               | 0.5 (0.2 - 0.8)               | 0.2 (0.0 - 0.4)               | 1.0 (0.5 - 1.5)               |
| Ewing sarcoma                  | 570                            | 2.5 (1.5 - 3.5)               | 1.9 (1.0 - 2.7)               | 0.1 (0.0 - 0.3)               | 1.6 (0.8 - 2.4)               |
| Osteosarcoma                   | 1154                           | 2.9 (2.1 - 3.7)               | 0.6 (0.3 - 1.0)               | 0.4 (0.1 - 0.7)               | 1.3 (0.8 - 1.9)               |
| Other bone tumors              | 26                             | 7.7 (0.0 - 15.4)              | 0.0 (0.0 - 1.3)               | 1.2 (0.0 - 3.6)               | 0.0 (0.0 - 1.3)               |
| <b>30-years from diagnosis</b> |                                |                               |                               |                               |                               |
| <b>All survivors</b>           | 16139                          | 3.2 (3.0 - 3.4)               | 0.9 (0.8 - 1.0)               | 0.5 (0.4 - 0.6)               | 1.9 (1.7 - 2.0)               |
| <b>Sex</b>                     |                                |                               |                               |                               |                               |
| Male                           | 8797                           | 3.1 (2.8 - 3.4)               | 1.0 (0.8 - 1.2)               | 0.5 (0.4 - 0.6)               | 1.8 (1.6 - 2.0)               |
| Female                         | 7343                           | 3.3 (3.0 - 3.6)               | 0.8 (0.6 - 0.9)               | 0.5 (0.4 - 0.6)               | 1.9 (1.7 - 2.2)               |
| <b>Diagnosis</b>               |                                |                               |                               |                               |                               |
| Acute lymphoblastic leukemia   | 5062                           | 2.0 (1.8 - 2.3)               | 0.3 (0.2 - 0.4)               | 0.3 (0.2 - 0.5)               | 1.0 (0.8 - 1.2)               |
| Acute myeloid leukemia         | 432                            | 2.7 (1.5 - 3.9)               | 0.9 (0.3 - 1.5)               | 1.1 (0.4 - 1.8)               | 3.3 (2.1 - 4.6)               |
| Other leukemia                 | 228                            | 3.1 (1.5 - 4.7)               | 0.8 (0.0 - 1.6)               | 1.1 (0.2 - 2.0)               | 3.3 (1.5 - 5.0)               |
| Astrocytoma                    | 1369                           | 4.0 (3.3 - 4.8)               | 0.6 (0.3 - 0.9)               | 0.9 (0.5 - 1.3)               | 3.0 (2.4 - 3.7)               |
| Medulloblastoma                | 374                            | 8.1 (6.4 - 9.8)               | 0.1 (0.0 - 0.3)               | 0.6 (0.1 - 1.1)               | 3.5 (2.2 - 4.8)               |
| Other CNS tumors               | 260                            | 5.5 (3.7 - 7.2)               | 0.5 (0.0 - 1.1)               | 0.1 (0.0 - 0.3)               | 3.4 (1.9 - 5.0)               |
| Hodgkin lymphoma               | 2096                           | 5.7 (4.9 - 6.4)               | 3.1 (2.5 - 3.7)               | 1.0 (0.6 - 1.3)               | 2.8 (2.3 - 3.4)               |
| Non-Hodgkin lymphoma           | 1315                           | 2.8 (2.1 - 3.5)               | 1.3 (0.8 - 1.8)               | 0.5 (0.2 - 0.8)               | 2.3 (1.7 - 2.9)               |
| Wilms tumor                    | 1588                           | 1.7 (1.1 - 2.2)               | 0.7 (0.4 - 1.1)               | 0.1 (0.0 - 0.3)               | 1.1 (0.7 - 1.5)               |
| Neuroblastoma                  | 1228                           | 1.7 (1.1 - 2.2)               | 0.3 (0.0 - 0.5)               | 0.6 (0.3 - 0.9)               | 1.1 (0.6 - 1.5)               |
| Soft tissue sarcoma            | 884                            | 3.7 (2.7 - 4.6)               | 0.8 (0.3 - 1.2)               | 0.3 (0.0 - 0.6)               | 1.4 (0.8 - 2.0)               |
| Ewing sarcoma                  | 417                            | 3.8 (2.4 - 5.1)               | 2.5 (1.4 - 3.6)               | 0.4 (0.0 - 1.0)               | 2.0 (1.1 - 3.0)               |
| Osteosarcoma                   | 885                            | 4.4 (3.4 - 5.5)               | 0.9 (0.4 - 1.4)               | 0.4 (0.1 - 0.7)               | 2.1 (1.4 - 2.9)               |

|                                |      |                    |                  |                 |                   |
|--------------------------------|------|--------------------|------------------|-----------------|-------------------|
| Other bone tumors              | 14   | 7.7 (0.0 - 15.4)   | 0.0 (0.0 - 15.4) | 1.2 (0.0 - 3.6) | 0.0 (0.0 - 15.4)  |
| <b>35-years from diagnosis</b> |      |                    |                  |                 |                   |
| <b>All survivors</b>           | 9924 | 4.5 (4.2 - 4.7)    | 1.5 (1.3 - 1.6)  | 0.7 (0.6 - 0.8) | 2.6 (2.4 - 2.8)   |
| <b>Sex</b>                     |      |                    |                  |                 |                   |
| Male                           | 5388 | 4.3 (4.0 - 4.7)    | 1.7 (1.4 - 1.9)  | 0.7 (0.6 - 0.9) | 2.7 (2.4 - 3.0)   |
| Female                         | 4536 | 4.6 (4.2 - 5.0)    | 1.3 (1.0 - 1.5)  | 0.7 (0.5 - 0.9) | 2.6 (2.3 - 2.9)   |
| <b>Diagnosis</b>               |      |                    |                  |                 |                   |
| Acute lymphoblastic leukemia   | 3095 | 2.7 (2.3 - 3.0)    | 0.4 (0.3 - 0.6)  | 0.4 (0.3 - 0.6) | 1.5 (1.2 - 1.7)   |
| Acute myeloid leukemia         | 238  | 4.0 (2.4 - 5.7)    | 2.1 (0.8 - 3.4)  | 1.1 (0.4 - 1.8) | 4.1 (2.6 - 5.6)   |
| Other leukemia                 | 141  | 3.1 (1.5 - 4.7)    | 1.2 (0.1 - 2.4)  | 1.4 (0.3 - 2.5) | 6.2 (3.5 - 8.9)   |
| Astrocytoma                    | 713  | 5.7 (4.7 - 6.7)    | 1.0 (0.5 - 1.4)  | 1.1 (0.6 - 1.5) | 4.1 (3.3 - 5.0)   |
| Medulloblastoma                | 197  | 10.2 (8.0 - 12.3)  | 0.1 (0.0 - 0.3)  | 0.8 (0.2 - 1.4) | 3.8 (2.4 - 5.2)   |
| Other CNS tumors               | 130  | 7.7 (5.2 - 10.2)   | 0.9 (0.0 - 1.8)  | 0.1 (0.0 - 0.3) | 5.1 (2.9 - 7.3)   |
| Hodgkin lymphoma               | 1385 | 8.8 (7.7 - 9.8)    | 5.2 (4.3 - 6.0)  | 1.5 (1.1 - 1.9) | 3.7 (3.1 - 4.4)   |
| Non-Hodgkin lymphoma           | 761  | 3.4 (2.6 - 4.2)    | 2.1 (1.4 - 2.8)  | 0.9 (0.4 - 1.3) | 3.3 (2.4 - 4.1)   |
| Wilms tumor                    | 1014 | 2.2 (1.6 - 2.8)    | 0.9 (0.5 - 1.2)  | 0.3 (0.0 - 0.5) | 2.1 (1.4 - 2.8)   |
| Neuroblastoma                  | 799  | 2.0 (1.3 - 2.6)    | 0.7 (0.2 - 1.1)  | 0.7 (0.3 - 1.0) | 1.8 (1.2 - 2.5)   |
| Soft tissue sarcoma            | 592  | 5.6 (4.2 - 6.9)    | 0.9 (0.4 - 1.4)  | 0.4 (0.0 - 0.7) | 2.2 (1.4 - 3.1)   |
| Ewing sarcoma                  | 266  | 5.2 (3.5 - 6.9)    | 2.7 (1.6 - 3.9)  | 0.4 (0.0 - 1.0) | 3.1 (1.8 - 4.5)   |
| Osteosarcoma                   | 596  | 5.5 (4.3 - 6.7)    | 1.6 (0.9 - 2.4)  | 0.6 (0.2 - 1.0) | 2.5 (1.7 - 3.4)   |
| Other bone tumors              | 9    | 7.7 (0.0 - 15.4)   | 0.0 (0.0 - 19.5) | 1.2 (0.0 - 3.6) | 9.7 (0.0 - 27.7)  |
| <b>40-years from diagnosis</b> |      |                    |                  |                 |                   |
| <b>All survivors</b>           | 4550 | 6.7 (6.3 - 7.1)    | 2.5 (2.2 - 2.8)  | 1.0 (0.9 - 1.2) | 4.1 (3.8 - 4.5)   |
| <b>Sex</b>                     |      |                    |                  |                 |                   |
| Male                           | 2433 | 6.4 (5.9 - 6.9)    | 2.8 (2.4 - 3.2)  | 1.0 (0.8 - 1.2) | 4.0 (3.6 - 4.5)   |
| Female                         | 2119 | 7.0 (6.4 - 7.6)    | 2.1 (1.7 - 2.5)  | 1.1 (0.8 - 1.3) | 4.2 (3.7 - 4.7)   |
| <b>Diagnosis</b>               |      |                    |                  |                 |                   |
| Acute lymphoblastic leukemia   | 1414 | 4.2 (3.6 - 4.9)    | 0.7 (0.4 - 1.0)  | 0.5 (0.3 - 0.7) | 2.5 (2.0 - 3.0)   |
| Acute myeloid leukemia         | 82   | 6.8 (4.1 - 9.6)    | 3.7 (1.4 - 6.0)  | 1.7 (0.4 - 2.9) | 6.2 (3.7 - 8.6)   |
| Other leukemia                 | 78   | 3.9 (1.7 - 6.0)    | 1.2 (0.1 - 2.4)  | 1.4 (0.3 - 2.5) | 6.7 (3.8 - 9.6)   |
| Astrocytoma                    | 331  | 8.3 (6.7 - 9.9)    | 1.2 (0.7 - 1.8)  | 1.6 (0.9 - 2.3) | 7.0 (5.5 - 8.6)   |
| Medulloblastoma                | 69   | 13.2 (10.0 - 16.3) | 1.2 (0.0 - 2.8)  | 0.8 (0.2 - 1.4) | 7.4 (4.1 - 10.6)  |
| Other CNS tumors               | 50   | 8.4 (5.6 - 11.2)   | 0.9 (0.0 - 1.8)  | 1.5 (0.0 - 3.5) | 10.5 (6.0 - 14.9) |
| Hodgkin lymphoma               | 653  | 13.2 (11.8 - 14.6) | 8.5 (7.3 - 9.7)  | 2.2 (1.6 - 2.9) | 5.5 (4.5 - 6.4)   |
| Non-Hodgkin lymphoma           | 281  | 5.5 (4.1 - 6.9)    | 3.3 (2.1 - 4.5)  | 1.5 (0.7 - 2.4) | 4.8 (3.5 - 6.1)   |
| Wilms tumor                    | 480  | 3.3 (2.3 - 4.2)    | 1.1 (0.6 - 1.7)  | 0.3 (0.0 - 0.5) | 3.5 (2.4 - 4.5)   |
| Neuroblastoma                  | 399  | 2.6 (1.7 - 3.4)    | 0.9 (0.3 - 1.4)  | 0.9 (0.3 - 1.4) | 2.7 (1.7 - 3.7)   |
| Soft tissue sarcoma            | 322  | 8.1 (6.2 - 10.0)   | 1.3 (0.5 - 2.0)  | 0.4 (0.0 - 0.7) | 4.1 (2.7 - 5.6)   |
| Ewing sarcoma                  | 115  | 8.8 (6.0 - 11.6)   | 4.7 (2.6 - 6.8)  | 0.4 (0.0 - 1.0) | 3.5 (2.0 - 5.1)   |
| Osteosarcoma                   | 282  | 6.7 (5.2 - 8.3)    | 2.5 (1.4 - 3.5)  | 1.1 (0.4 - 1.8) | 2.7 (1.8 - 3.6)   |
| Other bone tumors              | 7    | 7.7 (0.0 - 15.4)   | 0.0 (0.0 - 20.6) | 1.2 (0.0 - 3.6) | 9.7 (0.0 - 27.7)  |

Central nervous system (CNS)



**Table S3.** Standardized mortality ratios and 95% confidence intervals by cause of death in all eligible survivors.

|                                         | All-cause |             |         | External cause (accident/injury) |           |         | Health-related cause |             |         |
|-----------------------------------------|-----------|-------------|---------|----------------------------------|-----------|---------|----------------------|-------------|---------|
|                                         | SMR       | 95% CI      | p-value | SMR                              | 95% CI    | p-value | SMR                  | 95% CI      | p-value |
| <b>All survivors</b>                    | 5.6       | 5.4 - 5.7   | <0.01   | 1.1                              | 1.0 - 1.2 | 0.013   | 5.6                  | 5.4 - 5.8   | <0.01   |
| <b>Sex</b>                              |           |             |         |                                  |           |         |                      |             |         |
| Male                                    | 4.6       | 4.4 - 4.7   | <0.01   | 1.0                              | 0.9 - 1.1 | 0.52    | 4.8                  | 4.6 - 5.1   | <0.01   |
| Female                                  | 8.0       | 7.7 - 8.3   | <0.01   | 1.4                              | 1.2 - 1.7 | <0.01   | 6.9                  | 6.5 - 7.2   | <0.01   |
| <b>Diagnosis</b>                        |           |             |         |                                  |           |         |                      |             |         |
| Acute lymphoblastic leukemia            | 4.7       | 4.4 - 4.9   | <0.01   | 1.0                              | 0.9 - 1.2 | 0.95    | 4.2                  | 3.9 - 4.5   | <0.01   |
| Acute myeloid leukemia                  | 6.2       | 5.3 - 7.1   | <0.01   | 1.5                              | 0.9 - 2.2 | 0.11    | 6.6                  | 5.4 - 8.1   | <0.01   |
| Other leukemia                          | 8.7       | 7.3 - 10.3  | <0.01   | 0.6                              | 0.2 - 1.5 | 0.41    | 6.5                  | 4.8 - 8.5   | <0.01   |
| Astrocytoma                             | 7.9       | 7.4 - 8.5   | <0.01   | 1.3                              | 1.0 - 1.6 | 0.077   | 7.5                  | 6.8 - 8.3   | <0.01   |
| Medulloblastoma                         | 12.9      | 11.6 - 14.3 | <0.01   | 1.0                              | 0.6 - 1.6 | 0.99    | 13.0                 | 11.1 - 15.2 | <0.01   |
| Other CNS tumors                        | 9.1       | 7.9 - 10.5  | <0.01   | 1.3                              | 0.7 - 2.2 | 0.32    | 8.4                  | 6.8 - 10.3  | <0.01   |
| Hodgkin disease                         | 6.2       | 5.8 - 6.5   | <0.01   | 1.1                              | 0.9 - 1.3 | 0.51    | 6.9                  | 6.4 - 7.4   | <0.01   |
| Non-Hodgkin lymphoma                    | 3.4       | 3.1 - 3.8   | <0.01   | 1.1                              | 0.9 - 1.5 | 0.40    | 4.5                  | 3.9 - 5.1   | <0.01   |
| Wilms tumor                             | 3.9       | 3.4 - 4.4   | <0.01   | 1.0                              | 0.7 - 1.4 | 0.81    | 5.2                  | 4.5 - 6.1   | <0.01   |
| Neuroblastoma                           | 5.0       | 4.4 - 5.7   | <0.01   | 1.0                              | 0.7 - 1.5 | 0.90    | 5.5                  | 4.5 - 6.5   | <0.01   |
| Soft tissue sarcoma                     | 4.8       | 4.2 - 5.4   | <0.01   | 1.2                              | 0.8 - 1.7 | 0.28    | 4.9                  | 4.2 - 5.8   | <0.01   |
| Ewing sarcoma                           | 7.3       | 6.5 - 8.3   | <0.01   | 1.1                              | 0.7 - 1.8 | 0.66    | 5.3                  | 4.3 - 6.4   | <0.01   |
| Osteosarcoma                            | 4.7       | 4.2 - 5.2   | <0.01   | 1.5                              | 1.1 - 2.0 | 0.021   | 3.3                  | 2.9 - 3.9   | <0.01   |
| Other bone tumors                       | 4.4       | 2.0 - 8.3   | <0.01   | 1.0                              | 0.0 - 5.8 | 0.99    | 5.5                  | 2.0 - 11.9  | 0.002   |
| <b>Survival after diagnosis (years)</b> |           |             |         |                                  |           |         |                      |             |         |
| 5-9                                     | 18.1      | 17.3 - 18.9 | <0.01   | 1.1                              | 0.8 - 1.3 | 0.66    | 13.1                 | 11.9 - 14.4 | <0.01   |
| 10-14                                   | 6.2       | 5.8 - 6.6   | <0.01   | 0.9                              | 0.7 - 1.1 | 0.43    | 7.6                  | 6.8 - 8.4   | <0.01   |
| 15-19                                   | 3.9       | 3.6 - 4.2   | <0.01   | 1.1                              | 0.9 - 1.3 | 0.43    | 5.4                  | 4.8 - 6.0   | <0.01   |
| 20-24                                   | 3.8       | 3.5 - 4.1   | <0.01   | 1.2                              | 1.0 - 1.4 | 0.12    | 4.9                  | 4.5 - 5.4   | <0.01   |
| 25-29                                   | 4.0       | 3.7 - 4.3   | <0.01   | 1.1                              | 0.9 - 1.4 | 0.25    | 5.3                  | 4.9 - 5.8   | <0.01   |
| 30-34                                   | 3.6       | 3.3 - 3.9   | <0.01   | 1.3                              | 1.0 - 1.7 | 0.048   | 4.3                  | 3.9 - 4.7   | <0.01   |
| 35-39                                   | 4.3       | 3.9 - 4.7   | <0.01   | 1.4                              | 1.0 - 1.9 | 0.064   | 4.9                  | 4.5 - 5.4   | <0.01   |
| ≥40                                     | 4.0       | 3.5 - 4.5   | <0.01   | 1.3                              | 0.7 - 2.1 | 0.41    | 4.4                  | 3.9 - 5.0   | <0.01   |

|                                         | Health-related causes of death |             |       |         |            |       |           |            |       |       |            |       |
|-----------------------------------------|--------------------------------|-------------|-------|---------|------------|-------|-----------|------------|-------|-------|------------|-------|
|                                         | Subsequent neoplasm            |             |       | Cardiac |            |       | Pulmonary |            |       | Other |            |       |
|                                         | SMR                            | 95% CI      | P     | SMR     | 95% CI     | P     | SMR       | 95% CI     | P     | SMR   | 95% CI     | P     |
| <b>All survivors</b>                    | 10.1                           | 9.6 - 10.6  | <0.01 | 4.3     | 3.9 - 4.7  | <0.01 | 7.5       | 6.6 - 8.4  | <0.01 | 3.3   | 3.1 - 3.6  | <0.01 |
| <b>Sex</b>                              |                                |             |       |         |            |       |           |            |       |       |            |       |
| Male                                    | 9.9                            | 9.2 - 10.6  | <0.01 | 3.6     | 3.2 - 4.0  | <0.01 | 7.0       | 5.9 - 8.3  | <0.01 | 2.8   | 2.6 - 3.1  | <0.01 |
| Female                                  | 10.3                           | 9.6 - 11.1  | <0.01 | 6.2     | 5.4 - 7.1  | <0.01 | 8.1       | 6.7 - 9.8  | <0.01 | 4.3   | 3.9 - 4.8  | <0.01 |
| <b>Diagnosis</b>                        |                                |             |       |         |            |       |           |            |       |       |            |       |
| Acute lymphoblastic leukemia            | 8.9                            | 8.0 - 10.0  | <0.01 | 2.1     | 1.6 - 2.7  | <0.01 | 5.2       | 3.8 - 6.9  | <0.01 | 2.5   | 2.1 - 2.9  | <0.01 |
| Acute myeloid leukemia                  | 8.5                            | 5.9 - 11.9  | <0.01 | 5.6     | 3.3 - 9.0  | <0.01 | 13.5      | 6.9 - 23.5 | <0.01 | 5.2   | 3.6 - 7.1  | <0.01 |
| Other leukemia                          | 8.5                            | 5.0 - 13.6  | <0.01 | 3.0     | 1.0 - 6.9  | 0.057 | 15.7      | 6.3 - 32.4 | <0.01 | 5.9   | 3.7 - 8.9  | <0.01 |
| Astrocytoma                             | 13.1                           | 11.2 - 15.2 | <0.01 | 3.0     | 2.0 - 4.2  | <0.01 | 12.1      | 8.4 - 16.8 | <0.01 | 5.8   | 4.8 - 6.8  | <0.01 |
| Medulloblastoma                         | 33.6                           | 27.4 - 40.8 | <0.01 | 2.9     | 1.2 - 5.9  | 0.025 | 12.3      | 5.6 - 23.4 | <0.01 | 6.7   | 4.8 - 9.1  | <0.01 |
| Other CNS tumors                        | 17.4                           | 12.9 - 23.0 | <0.01 | 1.8     | 0.5 - 4.6  | 0.37  | 6.3       | 1.7 - 16.1 | 0.008 | 6.6   | 4.6 - 9.2  | <0.01 |
| Hodgkin disease                         | 10.8                           | 9.7 - 11.9  | <0.01 | 8.7     | 7.6 - 9.9  | <0.01 | 9.9       | 7.8 - 12.5 | <0.01 | 3.1   | 2.6 - 3.6  | <0.01 |
| Non-Hodgkin lymphoma                    | 6.9                            | 5.6 - 8.5   | <0.01 | 4.1     | 3.1 - 5.5  | <0.01 | 7.1       | 4.4 - 10.8 | <0.01 | 3.0   | 2.4 - 3.8  | <0.01 |
| Wilms tumor                             | 9.2                            | 7.2 - 11.6  | <0.01 | 4.4     | 2.9 - 6.5  | <0.01 | 2.7       | 0.9 - 6.4  | 0.078 | 3.8   | 2.9 - 5.0  | <0.01 |
| Neuroblastoma                           | 9.3                            | 6.9 - 12.4  | <0.01 | 2.9     | 1.4 - 5.1  | 0.004 | 11.5      | 6.4 - 19.0 | <0.01 | 3.7   | 2.7 - 5.1  | <0.01 |
| Soft tissue sarcoma                     | 11.1                           | 8.9 - 13.7  | <0.01 | 2.2     | 1.2 - 3.6  | 0.014 | 3.4       | 1.3 - 7.5  | 0.018 | 2.9   | 2.1 - 3.9  | <0.01 |
| Ewing sarcoma                           | 9.2                            | 6.8 - 12.1  | <0.01 | 6.3     | 4.1 - 9.2  | <0.01 | 3.6       | 1.0 - 9.1  | 0.055 | 2.8   | 1.8 - 4.1  | <0.01 |
| Osteosarcoma                            | 6.3                            | 5.0 - 7.7   | <0.01 | 2.3     | 1.5 - 3.4  | <0.01 | 4.9       | 2.6 - 8.1  | <0.01 | 1.8   | 1.3 - 2.4  | 0.001 |
| Other bone tumors                       | 12.6                           | 3.4 - 32.4  | <0.01 | 0.0     | 0.0 - 16.7 | 0.99  | 14.7      | 0.2 - 81.5 | 0.13  | 2.0   | 0.0 - 11.3 | 0.78  |
| <b>Survival after diagnosis (years)</b> |                                |             |       |         |            |       |           |            |       |       |            |       |
| 5-9                                     | 29.5                           | 26.0 - 33.4 | <0.01 | 8.8     | 6.1 - 12.3 | <0.01 | 13.0      | 8.9 - 18.4 | <0.01 | 6.4   | 5.3 - 7.7  | <0.01 |
| 10-14                                   | 17.4                           | 15.0 - 20.1 | <0.01 | 7.1     | 5.2 - 9.4  | <0.01 | 11.7      | 8.1 - 16.2 | <0.01 | 3.4   | 2.7 - 4.2  | <0.01 |
| 15-19                                   | 10.8                           | 9.2 - 12.6  | <0.01 | 6.0     | 4.7 - 7.6  | <0.01 | 8.7       | 6.0 - 12.1 | <0.01 | 2.7   | 2.2 - 3.3  | <0.01 |
| 20-24                                   | 10.7                           | 9.3 - 12.3  | <0.01 | 4.1     | 3.2 - 5.2  | <0.01 | 6.5       | 4.4 - 9.4  | <0.01 | 2.6   | 2.1 - 3.1  | <0.01 |
| 25-29                                   | 9.7                            | 8.5 - 11.1  | <0.01 | 3.2     | 2.5 - 4.1  | <0.01 | 7.8       | 5.5 - 10.8 | <0.01 | 3.6   | 3.0 - 4.2  | <0.01 |
| 30-34                                   | 6.6                            | 5.7 - 7.6   | <0.01 | 3.7     | 2.9 - 4.5  | <0.01 | 5.5       | 3.7 - 7.8  | <0.01 | 2.8   | 2.4 - 3.4  | <0.01 |
| 35-39                                   | 7.2                            | 6.2 - 8.3   | <0.01 | 3.9     | 3.1 - 4.8  | <0.01 | 5.5       | 3.7 - 7.9  | <0.01 | 3.7   | 3.1 - 4.4  | <0.01 |
| ≥40                                     | 6.0                            | 4.9 - 7.2   | <0.01 | 3.9     | 2.9 - 5.0  | <0.01 | 5.6       | 3.6 - 8.4  | <0.01 | 3.1   | 2.3 - 3.9  | <0.01 |

Central nervous system (CNS); standardized mortality ratio (SMR)

**Table S4.** Absolute Excess Risk (AER) per 10,000 person-years and 95% confidence intervals by cause of death in all eligible survivors.

|                                         | All-cause |           |         | External cause (accident/injury) |        |         | Health-related cause |           |         |
|-----------------------------------------|-----------|-----------|---------|----------------------------------|--------|---------|----------------------|-----------|---------|
|                                         | AER       | 95% CI    | p-value | AER                              | 95% CI | p-value | AER                  | 95% CI    | p-value |
| <b>All survivors</b>                    | 56        | 54 - 57   | <.001   | 1                                | 0 - 1  | 0.013   | 29                   | 27 - 30   | <.001   |
| <b>Sex</b>                              |           |           |         |                                  |        |         |                      |           |         |
| Male                                    | 57        | 54 - 59   | <.001   | 0                                | 0 - 1  | 0.52    | 28                   | 26 - 29   | <.001   |
| Female                                  | 55        | 52 - 57   | <.001   | 1                                | 1 - 2  | <.001   | 30                   | 28 - 32   | <.001   |
| <b>Diagnosis</b>                        |           |           |         |                                  |        |         |                      |           |         |
| Acute lymphoblastic leukemia            | 38        | 35 - 40   | <.001   | 0                                | 0 - 1  | 0.95    | 15                   | 13 - 16   | <.001   |
| Acute myeloid leukemia                  | 57        | 47 - 67   | <.001   | 3                                | 0 - 7  | 0.11    | 31                   | 24 - 39   | <.001   |
| Other leukemia                          | 98        | 80 - 118  | <.001   | 0                                | 0 - 3  | 0.41    | 35                   | 24 - 48   | <.001   |
| Astrocytoma                             | 81        | 75 - 88   | <.001   | 2                                | 0 - 4  | 0.077   | 38                   | 34 - 43   | <.001   |
| Medulloblastoma                         | 128       | 114 - 143 | <.001   | 0                                | 0 - 4  | 0.99    | 55                   | 46 - 65   | <.001   |
| Other CNS tumors                        | 94        | 80 - 110  | <.001   | 2                                | 0 - 7  | 0.32    | 42                   | 33 - 53   | <.001   |
| Hodgkin disease                         | 97        | 91 - 14   | <.001   | 1                                | 0 - 2  | 0.51    | 69                   | 64 - 75   | <.001   |
| Non-Hodgkin lymphoma                    | 37        | 32 - 43   | <.001   | 1                                | 0 - 3  | 0.40    | 27                   | 23 - 32   | <.001   |
| Wilms tumor                             | 25        | 21 - 30   | <.001   | 0                                | 0 - 2  | 0.81    | 17                   | 13 - 20   | <.001   |
| Neuroblastoma                           | 32        | 27 - 37   | <.001   | 0                                | 0 - 2  | 0.90    | 15                   | 12 - 18   | <.001   |
| Soft tissue sarcoma                     | 50        | 43 - 58   | <.001   | 1                                | 0 - 5  | 0.28    | 28                   | 22 - 34   | <.001   |
| Ewing sarcoma                           | 100       | 86 - 115  | <.001   | 1                                | 0 - 6  | 0.66    | 39                   | 30 - 49   | <.001   |
| Osteosarcoma                            | 68        | 60 - 78   | <.001   | 3                                | 0 - 7  | 0.021   | 27                   | 22 - 34   | <.001   |
| Other bone tumors                       | 45        | 13 - 97   | <.001   | 0                                | 0 - 30 | 0.99    | 32                   | 7 - 77    | 0.002   |
| <b>Survival after diagnosis (years)</b> |           |           |         |                                  |        |         |                      |           |         |
| 5-9                                     | 95        | 91 - 100  | <.001   | 0                                | 0 - 1  | 0.66    | 21                   | 19 - 23   | <.001   |
| 10-14                                   | 41        | 38 - 45   | <.001   | 0                                | 0 - 1  | 0.43    | 17                   | 15 - 19   | <.001   |
| 15-19                                   | 31        | 28 - 34   | <.001   | 1                                | 0 - 2  | 0.43    | 17                   | 15 - 19   | <.001   |
| 20-24                                   | 36        | 32 - 40   | <.001   | 1                                | 0 - 3  | 0.12    | 24                   | 21 - 27   | <.001   |
| 25-29                                   | 48        | 44 - 54   | <.001   | 1                                | 0 - 3  | 0.25    | 40                   | 36 - 44   | <.001   |
| 30-34                                   | 59        | 53 - 67   | <.001   | 2                                | 0 - 5  | 0.048   | 50                   | 44 - 57   | <.001   |
| 35-39                                   | 102       | 91 - 115  | <.001   | 3                                | 0 - 7  | 0.064   | 94                   | 83 - 116  | <.001   |
| ≥40                                     | 138       | 117 - 161 | <.001   | 2                                | 0 - 9  | 0.41    | 131                  | 111 - 153 | <.001   |

|                                         | Health-related causes of death |         |       |         |         |       |           |        |       |       |         |       |
|-----------------------------------------|--------------------------------|---------|-------|---------|---------|-------|-----------|--------|-------|-------|---------|-------|
|                                         | Subsequent neoplasm            |         |       | Cardiac |         |       | Pulmonary |        |       | Other |         |       |
|                                         | AER                            | 95% CI  | P     | AER     | 95% CI  | P     | AER       | 95% CI | P     | AER   | 95% CI  | P     |
| <b>All survivors</b>                    | 15                             | 14 - 16 | <.001 | 4       | 4 - 5   | <.001 | 2         | 2 - 3  | <.001 | 7     | 6 - 7   | <.001 |
| <b>Sex</b>                              |                                |         |       |         |         |       |           |        |       |       |         |       |
| Male                                    | 15                             | 13 - 16 | <.001 | 4       | 4 - 5   | <.001 | 2         | 2 - 3  | <.001 | 6     | 5 - 7   | <.001 |
| Female                                  | 16                             | 14 - 17 | <.001 | 4       | 3 - 5   | <.001 | 2         | 2 - 3  | <.001 | 8     | 7 - 9   | <.001 |
| <b>Diagnosis</b>                        |                                |         |       |         |         |       |           |        |       |       |         |       |
| Acute lymphoblastic leukemia            | 9                              | 8 - 10  | <.001 | 1       | 1 - 2   | <.001 | 1         | 1 - 2  | <.001 | 3     | 3 - 4   | <.001 |
| Acute myeloid leukemia                  | 11                             | 7 - 16  | <.001 | 5       | 2 - 9   | <.001 | 4         | 2 - 7  | <.001 | 11    | 7 - 16  | <.001 |
| Other leukemia                          | 12                             | 6 - 20  | <.001 | 3       | 0 - 8   | 0.057 | 5         | 2 - 11 | <.001 | 15    | 8 - 24  | <.001 |
| Astrocytoma                             | 19                             | 16 - 22 | <.001 | 2       | 1 - 4   | <.001 | 4         | 3 - 5  | <.001 | 13    | 11 - 16 | <.001 |
| Medulloblastoma                         | 37                             | 30 - 45 | <.001 | 2       | 0 - 4   | 0.025 | 3         | 1 - 6  | <.001 | 13    | 9 - 18  | <.001 |
| Other CNS tumors                        | 24                             | 18 - 33 | <.001 | 1       | 0 - 4   | 0.37  | 2         | 0 - 5  | 0.008 | 15    | 10 - 22 | <.001 |
| Hodgkin disease                         | 33                             | 29 - 37 | <.001 | 20      | 17 - 23 | <.001 | 6         | 5 - 8  | <.001 | 11    | 8 - 13  | <.001 |
| Non-Hodgkin lymphoma                    | 12                             | 9 - 15  | <.001 | 6       | 4 - 8   | <.001 | 3         | 1 - 4  | <.001 | 7     | 5 - 10  | <.001 |
| Wilms tumor                             | 8                              | 6 - 10  | <.001 | 2       | 1 - 4   | <.001 | 0         | 0 - 1  | 0.078 | 6     | 4 - 8   | <.001 |
| Neuroblastoma                           | 7                              | 5 - 9   | <.001 | 1       | 0 - 2   | 0.004 | 2         | 1 - 4  | <.001 | 5     | 3 - 7   | <.001 |
| Soft tissue sarcoma                     | 19                             | 15 - 24 | <.001 | 2       | 0 - 4   | 0.014 | 1         | 0 - 3  | 0.018 | 6     | 3 - 9   | <.001 |
| Ewing sarcoma                           | 20                             | 14 - 27 | <.001 | 10      | 6 - 16  | <.001 | 1         | 0 - 4  | 0.055 | 7     | 3 - 13  | <.001 |
| Osteosarcoma                            | 18                             | 13 - 22 | <.001 | 3       | 1 - 6   | <.001 | 3         | 1 - 5  | <.001 | 4     | 1 - 7   | 0.001 |
| Other bone tumors                       | 24                             | 5 - 64  | <.001 | 0       | 0 - 22  | 0.99  | 6         | 0 - 36 | 0.13  | 3     | 0 - 33  | 0.78  |
| <b>Survival after diagnosis (years)</b> |                                |         |       |         |         |       |           |        |       |       |         |       |
| 5-9                                     | 13                             | 11 - 14 | <.001 | 2       | 1 - 2   | <.001 | 2         | 1 - 2  | <.001 | 5     | 4 - 6   | <.001 |
| 10-14                                   | 9                              | 8 - 11  | <.001 | 2       | 1 - 3   | <.001 | 2         | 1 - 2  | <.001 | 3     | 3 - 5   | <.001 |
| 15-19                                   | 8                              | 7 - 10  | <.001 | 3       | 2 - 4   | <.001 | 2         | 1 - 2  | <.001 | 4     | 3 - 5   | <.001 |
| 20-24                                   | 13                             | 12 - 16 | <.001 | 4       | 3 - 5   | <.001 | 2         | 1 - 3  | <.001 | 5     | 4 - 7   | <.001 |
| 25-29                                   | 21                             | 18 - 24 | <.001 | 5       | 3 - 6   | <.001 | 3         | 2 - 5  | <.001 | 11    | 9 - 14  | <.001 |
| 30-34                                   | 25                             | 21 - 29 | <.001 | 10      | 7 - 13  | <.001 | 4         | 2 - 6  | <.001 | 12    | 9 - 16  | <.001 |
| 35-39                                   | 46                             | 38 - 54 | <.001 | 17      | 12 - 22 | <.001 | 7         | 4 - 10 | <.001 | 25    | 19 - 32 | <.001 |
| ≥40                                     | 62                             | 49 - 78 | <.001 | 27      | 18 - 38 | <.001 | 13        | 7 - 21 | <.001 | 29    | 19 - 41 | <.001 |

Central nervous system (CNS)

**Table S5.** Risk of mortality due to specific causes of death in all eligible survivors and associations with treatment exposures.

|                                               | All-cause |             |         | Recurrence/Progression |             |         | External cause (accident/injury) |             |         | Health-related cause |             |         |
|-----------------------------------------------|-----------|-------------|---------|------------------------|-------------|---------|----------------------------------|-------------|---------|----------------------|-------------|---------|
|                                               | RR        | 95% CI      | p-value | RR                     | 95% CI      | p-value | RR                               | 95% CI      | p-value | RR                   | 95% CI      | p-value |
| <b>Treatment exposures</b>                    |           |             |         |                        |             |         |                                  |             |         |                      |             |         |
| Cranial radiation per 10 Gy                   | 1.18      | 1.15 - 1.20 | <0.001  | 1.22                   | 1.17 - 1.26 | <0.001  | 1.05                             | 1.00 - 1.12 | 0.062   | 1.15                 | 1.12 - 1.18 | <0.001  |
| Chest radiation per 10 Gy                     | 1.25      | 1.22 - 1.27 | <0.001  | 1.19                   | 1.15 - 1.23 | <0.001  | 1.09                             | 1.02 - 1.17 | 0.016   | 1.31                 | 1.28 - 1.34 | <0.001  |
| TBI exposure, reference to No                 | 1.50      | 1.26 - 1.78 | <0.001  | 1.50                   | 1.13 - 1.99 | 0.004   | 1.06                             | 0.44 - 2.54 | 0.89    | 1.64                 | 1.28 - 2.11 | <0.001  |
| Anthracycline per 100 mg/m <sup>2</sup>       | 1.08      | 1.05 - 1.10 | <0.001  | 1.11                   | 1.07 - 1.15 | <0.001  | 1.10                             | 1.04 - 1.17 | 0.001   | 1.06                 | 1.03 - 1.09 | <0.001  |
| Alkylator per 5000 mg/m <sup>2</sup>          | 1.06      | 1.04 - 1.08 | <0.001  | 1.07                   | 1.04 - 1.11 | <0.001  | 0.99                             | 0.92 - 1.06 | 0.71    | 1.06                 | 1.03 - 1.08 | <0.001  |
| Bleomycin per 50 mg/m <sup>2</sup>            | 1.02      | 0.95 - 1.09 | 0.59    | 1.00                   | 0.90 - 1.12 | 0.98    | 0.91                             | 0.72 - 1.15 | 0.44    | 1.07                 | 0.98 - 1.18 | 0.14    |
| Epipodophyllotoxin per 1000 mg/m <sup>2</sup> | 1.03      | 1.01 - 1.05 | 0.003   | 1.03                   | 1.01 - 1.06 | 0.010   | 1.02                             | 0.97 - 1.08 | 0.39    | 1.03                 | 1.00 - 1.06 | 0.029   |
| Platinum per 500 mg/m <sup>2</sup>            | 1.14      | 1.07 - 1.20 | <0.001  | 1.20                   | 1.11 - 1.30 | <0.001  | 1.06                             | 0.84 - 1.34 | 0.61    | 1.15                 | 1.04 - 1.26 | 0.004   |
| Methotrexate per 5000 mg/m <sup>2</sup>       | 1.00      | 1.00 - 1.01 | 0.028   | 1.00                   | 1.00 - 1.01 | <0.001  | 1.00                             | 0.99 - 1.01 | 0.90    | 1.00                 | 0.99 - 1.01 | 0.60    |

|                                               | Health-related causes |             |         |         |             |         |           |             |         |       |             |         |
|-----------------------------------------------|-----------------------|-------------|---------|---------|-------------|---------|-----------|-------------|---------|-------|-------------|---------|
|                                               | Subsequent neoplasm   |             |         | Cardiac |             |         | Pulmonary |             |         | Other |             |         |
|                                               | RR                    | 95% CI      | p-value | RR      | 95% CI      | p-value | RR        | 95% CI      | p-value | RR    | 95% CI      | p-value |
| <b>Treatment exposures</b>                    |                       |             |         |         |             |         |           |             |         |       |             |         |
| Cranial radiation per 10 Gy                   | 1.18                  | 1.14 - 1.21 | <0.001  | 0.96    | 0.89 - 1.04 | 0.30    | 1.15      | 1.07 - 1.24 | <0.001  | 1.18  | 1.14 - 1.23 | <0.001  |
| Chest radiation per 10 Gy                     | 1.30                  | 1.26 - 1.35 | <0.001  | 1.50    | 1.42 - 1.58 | <0.001  | 1.30      | 1.19 - 1.42 | <0.001  | 1.19  | 1.13 - 1.26 | <0.001  |
| TBI exposure, reference to No                 | 1.49                  | 1.00 - 2.22 | 0.047   | 0.67    | 0.27 - 1.66 | 0.39    | 2.55      | 1.30 - 4.99 | 0.006   | 2.29  | 1.57 - 3.35 | <0.001  |
| Anthracycline per 100 mg/m <sup>2</sup>       | 1.05                  | 1.01 - 1.09 | 0.020   | 1.16    | 1.09 - 1.23 | <0.001  | 1.07      | 0.97 - 1.17 | 0.20    | 1.01  | 0.96 - 1.07 | 0.61    |
| Alkylator per 5000 mg/m <sup>2</sup>          | 1.06                  | 1.03 - 1.09 | <0.001  | 1.05    | 0.98 - 1.11 | 0.15    | 1.02      | 0.94 - 1.12 | 0.58    | 1.06  | 1.02 - 1.10 | 0.003   |
| Bleomycin per 50 mg/m <sup>2</sup>            | 1.08                  | 0.95 - 1.22 | 0.26    | 1.10    | 0.90 - 1.35 | 0.34    | 1.07      | 0.76 - 1.51 | 0.70    | 1.04  | 0.83 - 1.29 | 0.73    |
| Epipodophyllotoxin per 1000 mg/m <sup>2</sup> | 1.04                  | 1.01 - 1.07 | 0.011   | 1.02    | 0.95 - 1.09 | 0.66    | 1.03      | 0.95 - 1.12 | 0.41    | 1.01  | 0.95 - 1.07 | 0.73    |
| Platinum per 500 mg/m <sup>2</sup>            | 1.20                  | 1.08 - 1.34 | <0.001  | 0.97    | 0.67 - 1.41 | 0.87    | 0.96      | 0.66 - 1.40 | 0.84    | 1.14  | 0.97 - 1.33 | 0.11    |
| Methotrexate per 5000 mg/m <sup>2</sup>       | 1.00                  | 0.99 - 1.01 | 0.85    | 0.99    | 0.96 - 1.01 | 0.31    | 0.99      | 0.96 - 1.03 | 0.62    | 1.00  | 0.98 - 1.02 | 0.70    |

Relative rates (RR) are adjusted for all covariates displayed and sex, age at diagnosis, race/ethnicity and attained age adjusted as cubic splines. Statistically significant associations with treatment are bolded.

**Table S6.** Risk of mortality and associations with treatment exposures due to specific causes of death among survivors who have survived at least 30 years from diagnosis.

|                                         | All-cause |             | External cause<br>(accident/injury) |             | Health-related cause |             |
|-----------------------------------------|-----------|-------------|-------------------------------------|-------------|----------------------|-------------|
|                                         | RR        | 95% CI      | RR                                  | 95% CI      | RR                   | 95% CI      |
| <b>Treatment exposures</b>              |           |             |                                     |             |                      |             |
| Cranial radiation per 10 Gy             | 1.16      | 1.12 - 1.20 | 1.12                                | 1.01 - 1.25 | 1.15                 | 1.10 - 1.19 |
| Chest radiation per 10 Gy               | 1.34      | 1.29 - 1.38 | 1.15                                | 1.00 - 1.32 | 1.36                 | 1.31 - 1.42 |
| Anthracycline per 100 mg/m <sup>2</sup> | 1.03      | 0.98 - 1.07 | 1.14                                | 1.02 - 1.27 | 1.02                 | 0.98 - 1.07 |
| Alkylator per 5000 mg/m <sup>2</sup>    | 1.04      | 1.01 - 1.08 | 0.95                                | 0.82 - 1.10 | 1.05                 | 1.01 - 1.09 |
| Platinum per 500 mg/m <sup>2</sup>      | 0.94      | 0.68 - 1.31 | 1.20                                | 0.81 - 1.78 | 0.89                 | 0.59 - 1.34 |
| Methotrexate per 5000 mg/m <sup>2</sup> | 1.00      | 0.98 - 1.01 | 0.99                                | 0.94 - 1.03 | 1.00                 | 0.99 - 1.01 |

| Health-related causes                   | Subsequent neoplasm |             | Cardiac |             | Pulmonary |             | Other health-related |             |
|-----------------------------------------|---------------------|-------------|---------|-------------|-----------|-------------|----------------------|-------------|
|                                         | RR                  | 95% CI      | RR      | 95% CI      | RR        | 95% CI      | RR                   | 95% CI      |
| <b>Treatment exposures</b>              |                     |             |         |             |           |             |                      |             |
| Cranial radiation per 10 Gy             | 1.15                | 1.09 - 1.22 | 0.99    | 0.89 - 1.09 | 1.11      | 0.95 - 1.30 | 1.24                 | 1.17 - 1.32 |
| Chest radiation per 10 Gy               | 1.34                | 1.26 - 1.42 | 1.60    | 1.48 - 1.72 | 1.41      | 1.22 - 1.62 | 1.21                 | 1.12 - 1.31 |
| Anthracycline per 100 mg/m <sup>2</sup> | 1.02                | 0.95 - 1.09 | 1.10    | 1.01 - 1.20 | 1.03      | 0.87 - 1.21 | 0.98                 | 0.89 - 1.08 |
| Alkylator per 5000 mg/m <sup>2</sup>    | 1.07                | 1.03 - 1.12 | 1.01    | 0.93 - 1.10 | 0.99      | 0.84 - 1.17 | 1.05                 | 0.98 - 1.13 |
| Platinum per 500 mg/m <sup>2</sup>      | 0.92                | 0.53 - 1.59 | 0.57    | 0.10 - 3.43 | 0.63      | 0.10 - 4.18 | 0.94                 | 0.53 - 1.66 |
| Methotrexate per 5000 mg/m <sup>2</sup> | 1.00                | 0.98 - 1.02 | 1.00    | 0.98 - 1.03 | 1.01      | 0.98 - 1.05 | 0.98                 | 0.94 - 1.02 |

Relative rates (RR) are adjusted for sex, age at diagnosis, race/ethnicity as non-Hispanic white vs. other and all covariates displayed. Attained age adjusted as cubic splines.

**Table S7.** Standardized mortality ratio comparing specific causes of death among survivors to that expected in the general US population overall. Specific causes of death are modified from the 113 selected causes of death according to the 9<sup>th</sup> and 10<sup>th</sup> revision of International Classification of Disease (ICD) codes from the National Center for Vital Statistics and Center for Disease Control.<sup>1</sup>

| Category                          | Specific cause of death (subcategories)                                                         | ICD-10 Code                                                                                                | ICD-9 Code                                                         | SMR         | 95% CI          |
|-----------------------------------|-------------------------------------------------------------------------------------------------|------------------------------------------------------------------------------------------------------------|--------------------------------------------------------------------|-------------|-----------------|
| <b>Second neoplasm causes</b>     |                                                                                                 |                                                                                                            |                                                                    | <b>10·1</b> | <b>9·6-10·6</b> |
|                                   | <b>Oropharyngeal and gastrointestinal malignancies</b>                                          | C00-C25                                                                                                    | 140-157                                                            | 6·1         | 5·3-6·9         |
|                                   | <b>Laryngeal, tracheal and lung malignancies</b>                                                | C32-C34                                                                                                    | 161-162                                                            | 4·1         | 3·3-5·0         |
|                                   | <b>Skin cancers</b>                                                                             | C43-C44                                                                                                    | 172-173                                                            | 4·6         | 3·0-6·9         |
|                                   | <b>Breast cancer</b>                                                                            | C50                                                                                                        | 174-175                                                            | 7·0         | 5·8-8·5         |
|                                   | <b>Genitourinary malignancies</b>                                                               | C51-C58, C60-C68                                                                                           | 179-189                                                            | 4·1         | 3·2-5·2         |
|                                   | <b>CNS malignancies</b>                                                                         | C70-C72                                                                                                    | 191-192                                                            | 22·3        | 19·6-25·2       |
|                                   | <b>Bone, connective, and soft tissue malignancies</b>                                           | C40, C41, C49                                                                                              | 170-171                                                            | 21·9        | 18·6-25·7       |
|                                   | <b>Hodgkin lymphoma</b>                                                                         | C81                                                                                                        | 201                                                                | 16·8        | 11·7-23·2       |
|                                   | <b>Non-Hodgkin lymphoma</b>                                                                     | C82-C85                                                                                                    | 200, 202                                                           | 9·8         | 7·6-12·5        |
|                                   | <b>Leukemia</b>                                                                                 | C91-C95                                                                                                    | 204-208                                                            | 11·1        | 9·3-13·1        |
|                                   | <b>Benign meningioma</b>                                                                        | D32                                                                                                        | 225·2, 225·4                                                       | 123·0       | 76·1-188·1      |
|                                   | <b>All other specified neoplasms</b>                                                            | C26-C31, C37-C39, C45-C48, C69, C73-C79, C88, C90, C96 (excl 96·9) C97, D010, D126, D180, D332, D361, D469 | 158-160, 163-165, 173, 190, 193-198, 203, 209, 212·5, 212·7, 225·1 | 13·1        | 11·2-15·2       |
|                                   | <b>Malignant and other neoplasms NOS</b>                                                        | C79·9, C80, C96·9, D09·9, D36·9, D37·D44, D47-48                                                           | 199, 202·9, 229·9, 235-237, 238·0-238·3, 238·79, 238·8, 238·9, 239 | 49·0        | 42·3-56·5       |
| <b>Cardiac causes</b>             |                                                                                                 |                                                                                                            |                                                                    | <b>4·3</b>  | <b>3·9-4·7</b>  |
|                                   | <b>Rheumatic and other valvular heart disease</b>                                               | I00-I09, I34-I39                                                                                           | 390-398, 424                                                       | 15·5        | 11·9-19·9       |
|                                   | <b>Hypertensive heart disease</b>                                                               | I11, I13                                                                                                   | 402, 404                                                           | 0·9         | 0·5-1·6         |
|                                   | <b>Ischemic heart disease</b>                                                                   | I20-I25                                                                                                    | 410-414, 429·2, 429·7                                              | 3·1         | 2·7-3·6         |
|                                   | <b>Heart failure and cardiomyopathy</b>                                                         | I42, I43, I50                                                                                              | 425, 428                                                           | 9·2         | 7·8-10·7        |
|                                   | <b>Cardiac arrhythmias</b>                                                                      | I47-I49                                                                                                    | 427 (excluding 427·5)                                              | 3·2         | 1·8-5·2         |
|                                   | <b>Other specified heart disease</b>                                                            | I26-I33, I40-I41, I44-I46, I51 (excl I51·89, I51·9)                                                        | 415-423, 426, 427·5, 429 (excl 429·2, 429·7, 429·89, 429·9)        | 3·1         | 2·4-4·0         |
|                                   | <b>Heart disease, NOS</b>                                                                       | I51·89, I51·9                                                                                              | 429·89, 429·9                                                      | 16·6        | 9·5-26·9        |
| <b>Pulmonary causes</b>           |                                                                                                 |                                                                                                            |                                                                    | <b>7·5</b>  | <b>6·6-8·4</b>  |
|                                   | <b>Influenza and pneumonia</b>                                                                  | J09-J18                                                                                                    | 480-488                                                            | 8·5         | 6·9-10·4        |
|                                   | <b>Chronic lower respiratory disease, includes asthma and chronic obstructive lung diseases</b> | J40-J47                                                                                                    | 490-494, 496                                                       | 1·7         | 1·1-2·6         |
|                                   | <b>Aspiration pneumonitis</b>                                                                   | J69                                                                                                        | 507                                                                | 12·4        | 8·1-18·2        |
|                                   | <b>Interstitial lung disease, includes pulmonary fibrosis</b>                                   | J84                                                                                                        | 515, 516                                                           | 28·0        | 10·8-36·8       |
|                                   | <b>Other specified respiratory diseases</b>                                                     | J00-J06, J20-J22, J30-J39, J60-J68, J70-J83, J85-J98                                                       | 034·0, 460-478, 495, 500-506, 508-514, 517-519                     | 10·9        | 8·2-14·3        |
| <b>Other health-related cause</b> |                                                                                                 |                                                                                                            |                                                                    | <b>3·3</b>  | <b>3·1-3·6</b>  |
|                                   | <b>Sepsis</b>                                                                                   | A40-A41                                                                                                    | 038                                                                | 8·1         | 6·3-10·1        |
|                                   | <b>Viral Hepatitis</b>                                                                          | B15-B19                                                                                                    | 070                                                                | 6·9         | 4·7-9·8         |
|                                   | <b>Other infectious causes of death</b>                                                         | A00-A39, A42-A99, B00-B14, B20-B99                                                                         | 001-037, 039-069, 071-139, 771·3                                   | 2·3         | 1·9-2·8         |
|                                   | <b>Diabetes mellitus</b>                                                                        | E10-E14                                                                                                    | 250                                                                | 1·7         | 1·2-2·3         |
|                                   | <b>Essential hypertension and assoc· kidney disease</b>                                         | I10, I12                                                                                                   | 401, 403                                                           | 2·5         | 1·2-4·5         |
|                                   | <b>Cerebrovascular disease</b>                                                                  | I60-I69                                                                                                    | 430-434, 436-438                                                   | 5·1         | 4·2-6·2         |

|                        |                                                                  |                                                    |                                                    |            |                |
|------------------------|------------------------------------------------------------------|----------------------------------------------------|----------------------------------------------------|------------|----------------|
|                        | <b>Other atherosclerotic and vascular disease</b>                | I70, I71-I78, I80-I99                              | 440, 441-448, 451-459                              | 4·2        | 2·9-5·9        |
|                        | <b>Chronic liver disease and cirrhosis</b>                       | K70, K73, K74                                      | 571                                                | 1·6        | 1·1-2·2        |
|                        | <b>Other diseases of the gastrointestinal system</b>             | K25-K28, K35-K38, K40-K46, K80-K82                 | 531-534, 540-543, 550-553, 574-575                 | 6·3        | 3·3-10·8       |
|                        | <b>Kidney failure</b>                                            | N17-N19                                            | 584-586                                            | 6·8        | 5·0-9·0        |
|                        | <b>Complications of pregnancy, childbirth and the peripartum</b> | O00-O99                                            | 630-676                                            | 2·6        | 1·2-4·8        |
|                        | <b>Congenital malformations and chromosomal anomalies</b>        | Q00-Q99                                            | 740-759                                            | 4·7        | 3·5-6·2        |
|                        | <b>Other health-related causes</b>                               | Residual (all known codes not otherwise specified) | Residual (all known codes not otherwise specified) | 3·4        | 3·0-3·8        |
|                        | <b>Ill-defined or NOS causes</b>                                 | R00-R99                                            | 780-799                                            | 2·1        | 1·5-2·8        |
| <b>External causes</b> |                                                                  |                                                    |                                                    | <b>1·1</b> | <b>1·0-1·2</b> |
|                        | <b>All transportation accidents</b>                              | V01-V99, Y85                                       | E800-E848, E929·0, E929·1                          | 1·2        | 1·0-1·3        |
|                        | <b>Falls</b>                                                     | W00-W19                                            | E880-E888                                          | 2·9        | 1·9-4·4        |
|                        | <b>Other accidents and sequelae</b>                              | W20-W99, X00-X39, X50-X59, Y86                     | E890-E929 (excl E924·1, E929·0, E929·1)            | 1·4        | 1·0-1·8        |
|                        | <b>Accidental poisoning and exposure to noxious substance</b>    | X40-X49                                            | E850-E868, E924·1                                  | 1·3        | 1·1-1·5        |
|                        | <b>Suicide</b>                                                   | X60-X84, X87·0                                     | E950-E959                                          | 1·0        | 0·8-1·1        |
|                        | <b>Homicide</b>                                                  |                                                    |                                                    | 0·4        | 0·3-0·6        |
|                        | <b>Complications of medical and surgical care</b>                | Y40-Y84, Y88                                       | E870-E879, E930-E949                               | 21·2       | 14·8-29·4      |
|                        | <b>Other external causes</b>                                     | Y10-Y36, Y87·2, Y89                                | E970-E978, E980-E999                               | 1·2        | 0·7-1·9        |

Central nervous system (CNS); Not otherwise specified (NOS)

**Table S8.** Demographic and diagnosis characteristics of 5-year survivors of childhood cancers who are included in modifiable risk analyses ( $\geq 18$  years of age at last survey) by vital status.

|                                                     | All eligible participants | Participants $\geq 18$ years of age (N=20,051) |                           |                           |
|-----------------------------------------------------|---------------------------|------------------------------------------------|---------------------------|---------------------------|
|                                                     |                           | Total n (%)                                    | Total n (%)               | Alive n (%)               |
| <b>All survivors</b>                                | 34230                     | 20,051                                         | 18138                     | 1913                      |
| <b>Sex</b>                                          |                           |                                                |                           |                           |
| Male                                                | 19093 (56)                | 10569 (53)                                     | 9512 (53)                 | 1057 (55)                 |
| <b>Race/ethnicity</b>                               |                           |                                                |                           |                           |
| Non-Hispanic white                                  | 21567 (64)                | 16356 (80)                                     | 14746 (80)                | 1610 (84)                 |
| Non-Hispanic black                                  | 2116 (6)                  | 1313 (7)                                       | 1181 (7)                  | 132 (7)                   |
| Hispanic                                            | 2591 (9)                  | 1629 (9)                                       | 1519 (9)                  | 110 (6)                   |
| Other                                               | 2213 (7)                  | 710 (4)                                        | 656 (4)                   | 54 (3)                    |
| Unknown                                             | 5743 (15)                 | 43 (0)                                         | 36 (0)                    | 7 (0)                     |
| <b>Age at diagnosis (years)</b>                     |                           |                                                |                           |                           |
| 0-4                                                 | 13803 (43)                | 7478 (40)                                      | 7043 (42)                 | 435 (24)                  |
| 5-9                                                 | 7738 (24)                 | 4683 (25)                                      | 4285 (25)                 | 398 (21)                  |
| 10-14                                               | 7110 (19)                 | 4490 (20)                                      | 3955 (20)                 | 535 (28)                  |
| 15-20                                               | 5579 (14)                 | 3400 (15)                                      | 2855 (14)                 | 545 (28)                  |
| <b>Survival from diagnosis (years)</b>              |                           |                                                |                           |                           |
| 5-19                                                | 5861 (17)                 | 1781 (9)                                       | 1538 (9)                  | 243 (13)                  |
| 20-29                                               | 12231 (41)                | 7726 (44)                                      | 6967 (44)                 | 759 (41)                  |
| 30-39                                               | 11588 (30)                | 7672 (34)                                      | 6943 (33)                 | 729 (37)                  |
| $\geq 40$                                           | 4550 (11)                 | 2872 (13)                                      | 2690 (13)                 | 182 (9)                   |
| <b>Decade of diagnosis</b>                          |                           |                                                |                           |                           |
| 1970-79                                             | 8770 (22)                 | 5143 (22)                                      | 4071 (19)                 | 1072 (55)                 |
| 1980-89                                             | 12768 (35)                | 7785 (37)                                      | 7102 (37)                 | 683 (36)                  |
| 1990-99                                             | 12692 (43)                | 7123 (41)                                      | 6965 (44)                 | 158 (9)                   |
| <b>Diagnosis</b>                                    |                           |                                                |                           |                           |
| Leukemia                                            | 10587 (40)                | 6351 (41)                                      | 5973 (43)                 | 378 (21)                  |
| Acute lymphoblastic leukemia                        | 8756 (36)                 | 5339 (37)                                      | 5050 (39)                 | 289 (16)                  |
| Acute myeloid leukemia                              | 1264 (3)                  | 757 (3)                                        | 695 (3)                   | 62 (3)                    |
| Other leukemia                                      | 567 (1)                   | 255 (1)                                        | 228 (1)                   | 27 (1)                    |
| Hodgkin lymphoma                                    | 4380 (11)                 | 2707 (12)                                      | 2120 (10)                 | 587 (30)                  |
| Non-Hodgkin lymphoma                                | 2853 (7)                  | 1798 (8)                                       | 1659 (8)                  | 139 (7)                   |
| CNS tumor                                           | 6144 (16)                 | 3356 (14)                                      | 2955 (14)                 | 401 (21)                  |
| Astrocytoma                                         | 3822 (10)                 | 2093 (9)                                       | 1839 (9)                  | 254 (13)                  |
| Medulloblastoma                                     | 1367 (3)                  | 769 (3)                                        | 671 (3)                   | 98 (5)                    |
| Other CNS                                           | 955 (2)                   | 494 (2)                                        | 445 (2)                   | 49 (3)                    |
| Wilms tumor                                         | 3072 (8)                  | 1825 (8)                                       | 1742 (8)                  | 83 (4)                    |
| Neuroblastoma                                       | 2630 (7)                  | 1352 (6)                                       | 1287 (6)                  | 65 (3)                    |
| Soft tissue sarcoma                                 | 1695 (4)                  | 971 (4)                                        | 881 (4)                   | 90 (5)                    |
| Bone tumors                                         | 2869 (7)                  | 1691 (7)                                       | 1521 (7)                  | 170 (9)                   |
| Ewing sarcoma                                       | 999 (3)                   | 575 (2)                                        | 511 (2)                   | 64 (3)                    |
| Osteosarcoma                                        | 1789 (5)                  | 1071 (5)                                       | 967 (5)                   | 104 (5)                   |
| Other bone tumors                                   | 81 (0)                    | 45 (0)                                         | 43 (0)                    | 2 (0)                     |
| <b>Treatment exposures</b>                          |                           |                                                |                           |                           |
| <b>Radiation exposure</b>                           |                           |                                                |                           |                           |
| Any radiation                                       | 18858 (55)                | 11125 (55)                                     | 9566 (48)                 | 1544 (80)                 |
| Cranial radiation (Gy) <sup>a</sup>                 |                           |                                                |                           |                           |
| Any exposure                                        | 10183 (30)                | 5876 (29)                                      | 5176 (28)                 | 687 (36)                  |
| Median dose (IQR)                                   | 24.0 (18.0 - 50.0)        | 24.0 (18.0 - 50.0)                             | 24.0 (18.0 - 50.0)        | 45.0 (24.0 - 53.9)        |
| Chest radiation (Gy) <sup>a</sup>                   |                           |                                                |                           |                           |
| Any exposure                                        | 8658 (25)                 | 5066 (25)                                      | 4136 (21)                 | 931 (48)                  |
| Median dose (IQR)                                   | 25.0 (15.0 - 36.0)        | 25.0 (15.0 - 36.0)                             | 24.0 (15.0 - 36.0)        | 36.0 (24.0 - 40.9)        |
| TBI                                                 | 921 (3)                   | 494 (2)                                        | 444(3)                    | 51(3)                     |
| <b>Chemotherapy</b>                                 |                           |                                                |                           |                           |
| Anthracycline (mg/m <sup>2</sup> ) <sup>b</sup>     |                           |                                                |                           |                           |
| Any exposure                                        | 16365 (48)                | 9742 (49)                                      | 9039 (55)                 | 683 (36)                  |
| Median dose (IQR)                                   | 159 (83 - 286)            | 158 (77.9 - 284.7)                             | 154.3 (76.2 - 274.8)      | 247.7 (150.5 - 365.1)     |
| Alkylating agents (mg/m <sup>2</sup> ) <sup>c</sup> |                           |                                                |                           |                           |
| Any exposure                                        | 18735 (55)                | 11004 (55)                                     | 9889 (56)                 | 1079 (57)                 |
| Median dose (IQR)                                   | 7215 (3095 - 12105)       | 7212.0 (3123.8 - 11845.2)                      | 7014.2 (3044.2 - 11432.3) | 9761.8 (5857.1 - 14814.2) |

|                                                      |                     |                           |                           |                          |
|------------------------------------------------------|---------------------|---------------------------|---------------------------|--------------------------|
| Bleomycin (mg/m <sup>2</sup> )                       |                     |                           |                           |                          |
| Any exposure                                         | 2373 (7)            | 1443 (7)                  | 1284 (6)                  | 152 (8)                  |
| Median dose (IQR)                                    | 62 (41 - 103)       | 61.9 (41.4 - 102.4)       | 61.8 (41.8 - 102.1)       | 69.1 (39.7 - 103.9)      |
| Epipodophyllotoxin (mg/m <sup>2</sup> ) <sup>d</sup> |                     |                           |                           |                          |
| Any exposure                                         | 6169 (18)           | 3495 (17)                 | 3315 (21)                 | 176 (10)                 |
| Median dose (IQR)                                    | 2003 (1004 - 4458)  | 2098.5 (1023.7 - 4781.6)  | 2102.4 (1035.1 - 4722.4)  | 2013.4 (789.5 - 5629.9)  |
| Platinum <sup>e</sup>                                |                     |                           |                           |                          |
| Any exposure                                         | 3916 (11)           | 2094 (10)                 | 1928 (9)                  | 154 (8)                  |
| Median dose (IQR)                                    | 469 (315 - 676)     | 468.2 (314.3 - 661.0)     | 468.6 (314.4 - 666.7)     | 462.0 (309.8 - 632.6)    |
| Methotrexate (mg/m <sup>2</sup> ) <sup>f</sup>       |                     |                           |                           |                          |
| Any exposure                                         | 8061 (24)           | 4887 (24)                 | 4589 (30)                 | 298 (16)                 |
| Median dose (IQR)                                    | 5921 (1506 - 21020) | 5953.4 (1583.1 - 20890.5) | 6125.7 (1641.4 - 20827.8) | 2866.4 (563.7 - 22582.4) |
| <b>Education attainment</b>                          |                     |                           |                           |                          |
| ≤High school graduate or GED                         |                     | 4641 (24)                 | 3988 (23)                 | 653 (35)                 |
| Some college                                         |                     | 6435 (33)                 | 5777 (33)                 | 658 (35)                 |
| College graduate or more                             |                     | 8748 (43)                 | 8200 (44)                 | 548 (29)                 |
| <b>Insurance status</b>                              |                     |                           |                           |                          |
| Yes                                                  |                     | 17326 (86)                | 15679 (86)                | 1647 (87)                |
| <b>Household income, 2016 dollars</b>                |                     |                           |                           |                          |
| <20,000                                              |                     | 4141 (24)                 | 3752 (25)                 | 389 (23)                 |
| 20-39,000                                            |                     | 2859 (16)                 | 2545 (15)                 | 314 (18)                 |
| 40-79,000                                            |                     | 5202 (28)                 | 4726 (28)                 | 476 (27)                 |
| ≥80,000                                              |                     | 6384 (32)                 | 5819 (32)                 | 565 (32)                 |
| <b>Lifestyle risk factors</b>                        |                     |                           |                           |                          |
| <b>Smoking status</b>                                |                     |                           |                           |                          |
| Ever smoker, current or former (score = 0)           |                     | 6485 (32)                 | 5802 (32)                 | 683 (36)                 |
| <b>Heavy/risky drinker</b>                           |                     |                           |                           |                          |
| Yes (score = 0)                                      |                     | 3790 (20)                 | 3498 (21)                 | 292 (17)                 |
| <b>Body mass index</b>                               |                     |                           |                           |                          |
| <18.5 (score = 0)                                    |                     | 860 (4)                   | 705 (4)                   | 155 (8)                  |
| 18.5-24.9 (score=1)                                  |                     | 8689 (44)                 | 7879 (44)                 | 810 (43)                 |
| 25-<30 (score = 1)                                   |                     | 5799 (29)                 | 5286 (29)                 | 513 (27)                 |
| 30+ (score = 0)                                      |                     | 4428 (23)                 | 4026 (23)                 | 402 (21)                 |
| <b>Physical activity (MET-hours/week)</b>            |                     |                           |                           |                          |
| 0 (score = 0)                                        |                     | 8049 (39)                 | 7021 (37)                 | 1028 (55)                |
| 3-6 (score = 0.5)                                    |                     | 4174 (22)                 | 3828 (22)                 | 346 (19)                 |
| 9-12 (score = 1)                                     |                     | 4527 (23)                 | 4227 (24)                 | 300 (16)                 |
| 15-21 (score = 1)                                    |                     | 2983 (16)                 | 2792 (17)                 | 191 (10)                 |
| <b>Healthy lifestyle score</b>                       |                     |                           |                           |                          |
| 0-0.5                                                |                     | 373 (2)                   | 325 (2)                   | 48 (2)                   |
| 1-1.5                                                |                     | 2338 (11)                 | 2060 (11)                 | 278 (14)                 |
| 2                                                    |                     | 4317 (21)                 | 3863 (21)                 | 454 (24)                 |
| 2.5                                                  |                     | 1917 (10)                 | 1706 (10)                 | 211 (11)                 |
| 3                                                    |                     | 5832 (29)                 | 5280 (29)                 | 552 (29)                 |
| 3.5                                                  |                     | 1725 (9)                  | 1590 (9)                  | 135 (7)                  |
| 4                                                    |                     | 3525 (18)                 | 3292 (19)                 | 233 (12)                 |
| <b>Healthy lifestyle score</b>                       |                     |                           |                           |                          |
| Unhealthy (0-2)                                      |                     | 7028 (34)                 | 6248 (34)                 | 780 (41)                 |
| Moderate (2.5-3)                                     |                     | 7749 (39)                 | 6986 (39)                 | 763 (40)                 |
| Healthy (3.5-4)                                      |                     | 5250 (27)                 | 4882 (28)                 | 368 (19)                 |
| <b>Modifiable cardiovascular risk factors</b>        |                     |                           |                           |                          |
| Diabetes                                             |                     | 955 (5)                   | 810 (4)                   | 145 (8)                  |
| Dyslipidemia                                         |                     | 1974 (9)                  | 1719 (8)                  | 255 (13)                 |
| Hypertension                                         |                     | 2742 (13)                 | 2347 (12)                 | 395 (21)                 |
| <b>Number of cardiovascular risk factors</b>         |                     |                           |                           |                          |
| None                                                 |                     | 15949 (81)                | 14584 (82)                | 1365 (71)                |
| 1                                                    |                     | 2802 (13)                 | 2458 (13)                 | 344 (18)                 |
| 2                                                    |                     | 1031 (5)                  | 870 (4)                   | 161 (8)                  |
| 3                                                    |                     | 269 (1)                   | 226 (1)                   | 43 (2)                   |

Central nervous system (CNS); Total body irradiation (TBI)

Reported counts and percentages are based on the status of lifestyle factors and modifiable cardiovascular risk factors at the most recent survey at age ≥18 years.



The four lifestyle variables (smoking status, heavy/risky drinking, physical activity, BMI) were individually scored as unhealthy (0) or healthy (1), with the exception of physical activity of 3-6 MET-h/week being moderately healthy with a score of 0.5. Scores are denoted next to each characteristic in the table. Component categories were then summed for a total lifestyle score of 0 to 4 points, categorized as unhealthy (0-2), moderately healthy (2.5-3.0) and healthy (3.5-4.0).

Analyses, including reported percentages and means/medians, were weighted to account for under-sampling of acute lymphoblastic leukemia (ALL) survivors (1987-1999).

<sup>a</sup> Cranial radiation and chest radiation are all excluding scatter to body site. Cranial radiation is maxTD (maximum target dose), taken as the sum of the prescribed dose for all overlapping brain fields.

Cumulative dose median and IQR are among participants who received the agent of interest.

<sup>b</sup> Anthracycline dose reported as doxorubicin equivalent dose where conversions are idarubicin x 3, daunorubicin x 0.5, mitoxantrone x 10 and epirubicin x 0.67.<sup>14</sup>

<sup>c</sup> Alkylator dose reported as cyclophosphamide equivalent dose conversions are ifosfamide x 0.244, procarbazine x 0.857, BCNU x 15, CCNU x 16, melphalan x 40, Thio-TEPA x 50, nitrogen mustard x 100 and Busulfan and 8.823.<sup>15</sup>

<sup>d</sup> Epipodophyllotoxin dose is the sum of teniposide and etoposide cumulative doses.

<sup>e</sup> Platinum dose is the sum of the cumulative carboplatin dose divided by 4 and the cisplatin dose.

<sup>f</sup> Methotrexate include all systemic methotrexate (IV, IM).

**Table S9.** Standardized mortality ratios (SMR) and 95% confidence intervals by cause of death among adult CCSS participants by modifiable risk factors.

|                                               | All-cause |            |         | External cause |           |         | Health-related cause |            |         |
|-----------------------------------------------|-----------|------------|---------|----------------|-----------|---------|----------------------|------------|---------|
|                                               | SMR       | 95% CI     | p-value | SMR            | 95% CI    | p-value | SMR                  | 95% CI     | p-value |
| <b>Behavioral/lifestyle risk factors</b>      |           |            |         |                |           |         |                      |            |         |
| <b>Smoking status</b>                         |           |            |         |                |           |         |                      |            |         |
| Never                                         | 3.8       | 3.6 - 4.1  | <.001   | 0.9            | 0.7 - 1.1 | 0.31    | 4.8                  | 4.5 - 5.2  | <.001   |
| Ever                                          | 4.2       | 3.9 - 4.5  | <.001   | 1.5            | 1.3 - 1.9 | <.001   | 5.2                  | 4.8 - 5.7  | <.001   |
| <b>Heavy/risky drinker</b>                    |           |            |         |                |           |         |                      |            |         |
| No                                            | 3.9       | 3.7 - 4.1  | <.001   | 0.9            | 0.8 - 1.1 | 0.29    | 4.9                  | 4.6 - 5.2  | <.001   |
| Yes                                           | 3.5       | 3.1 - 3.9  | <.001   | 1.5            | 1.1 - 2.0 | 0.007   | 4.4                  | 3.8 - 5.0  | <.001   |
| <b>Body mass index</b>                        |           |            |         |                |           |         |                      |            |         |
| <18.5                                         | 8.3       | 7.1 - 9.7  | <.001   | 1.7            | 0.9 - 2.9 | 0.10    | 11.1                 | 9.3 - 13.3 | <.001   |
| 18.5-24.9                                     | 3.8       | 3.5 - 4.0  | <.001   | 1.0            | 0.8 - 1.3 | 0.76    | 4.7                  | 4.3 - 5.0  | <.001   |
| 25.0-29.9                                     | 3.4       | 3.1 - 3.7  | <.001   | 1.1            | 0.8 - 1.4 | 0.50    | 4.2                  | 3.8 - 4.6  | <.001   |
| ≥30.0                                         | 4.4       | 4.0 - 4.8  | <.001   | 1.2            | 0.9 - 1.6 | 0.32    | 5.6                  | 5.0 - 6.2  | <.001   |
| <b>Physical activity (MET-hours/week)</b>     |           |            |         |                |           |         |                      |            |         |
| 0                                             | 5.1       | 4.8 - 5.4  | <.001   | 1.5            | 1.2 - 1.8 | <.001   | 6.1                  | 5.7 - 6.6  | <.001   |
| 3-6                                           | 3.5       | 3.2 - 3.9  | <.001   | 1.1            | 0.8 - 1.5 | 0.50    | 4.6                  | 4.0 - 5.1  | <.001   |
| 9-21                                          | 2.8       | 2.6 - 3.1  | <.001   | 0.7            | 0.5 - 0.9 | 0.006   | 3.6                  | 3.2 - 4.0  | <.001   |
| <b>Healthy lifestyle score</b>                |           |            |         |                |           |         |                      |            |         |
| Unhealthy (0-2)                               | 4.7       | 4.4 - 5.1  | <.001   | 1.5            | 1.2 - 1.9 | <.001   | 5.9                  | 5.5 - 6.4  | <.001   |
| Moderate (2.5-3)                              | 4.1       | 3.8 - 4.4  | <.001   | 1.1            | 0.9 - 1.4 | 0.34    | 5.0                  | 4.6 - 5.4  | <.001   |
| Healthy (3.5-4)                               | 2.8       | 2.5 - 3.1  | <.001   | 0.6            | 0.4 - 0.9 | 0.005   | 3.7                  | 3.3 - 4.1  | <.001   |
| <b>Hypertension</b>                           |           |            |         |                |           |         |                      |            |         |
| Yes                                           | 5.3       | 4.8 - 5.9  | <.001   | 1.2            | 0.7 - 1.7 | 0.53    | 6.6                  | 5.9 - 7.3  | <.001   |
| No                                            | 3.7       | 3.5 - 3.9  | <.001   | 1.1            | 1.0 - 1.3 | 0.10    | 4.6                  | 4.4 - 4.9  | <.001   |
| <b>Diabetes</b>                               |           |            |         |                |           |         |                      |            |         |
| Yes                                           | 6.9       | 5.8 - 8.0  | <.001   | 2.1            | 1.1 - 3.5 | 0.021   | 8.3                  | 7.0 - 9.9  | <.001   |
| No                                            | 3.8       | 3.7 - 4.0  | <.001   | 1.1            | 0.9 - 1.3 | 0.20    | 4.8                  | 4.5 - 5.0  | <.001   |
| <b>Dyslipidemia</b>                           |           |            |         |                |           |         |                      |            |         |
| Yes                                           | 4.3       | 3.8 - 4.9  | <.001   | 0.7            | 0.4 - 1.2 | 0.25    | 5.4                  | 4.8 - 6.2  | <.001   |
| No                                            | 3.9       | 3.7 - 4.1  | <.001   | 1.2            | 1.0 - 1.3 | 0.033   | 4.9                  | 4.6 - 5.2  | <.001   |
| <b>Modifiable cardiovascular risk factors</b> |           |            |         |                |           |         |                      |            |         |
| None                                          | 3.7       | 3.5 - 3.9  | <.001   | 1.1            | 1.0 - 1.3 | 0.089   | 4.5                  | 4.3 - 4.8  | <.001   |
| Any 1                                         | 4.7       | 4.2 - 5.2  | <.001   | 1.1            | 0.7 - 1.6 | 0.74    | 5.8                  | 5.2 - 6.5  | <.001   |
| Any 2                                         | 5.5       | 4.8 - 6.3  | <.001   | 1.1            | 0.6 - 2.0 | 0.79    | 6.8                  | 5.9 - 7.9  | <.001   |
| Hypertension, no diabetes or dyslipidemia     | 5.1       | 4.5 - 5.9  | <.001   | 1.2            | 0.7 - 1.9 | 0.62    | 6.4                  | 5.5 - 7.4  | <.001   |
| Diabetes, no dyslipidemia or hypertension     | 7.0       | 5.3 - 9.1  | <.001   | 3.2            | 1.5 - 6.1 | 0.004   | 7.4                  | 5.2 - 10.1 | <.001   |
| Dyslipidemia, no diabetes or hypertension     | 3.4       | 2.7 - 4.1  | <.001   | 0.1            | 0.0 - 0.7 | 0.009   | 4.5                  | 3.6 - 5.5  | <.001   |
| Hypertension + Diabetes                       | 9.4       | 6.7 - 12.9 | <.001   | 0.8            | 0.0 - 4.3 | 0.99    | 13.0                 | 9.2 - 18.0 | <.001   |
| Hypertension + Dyslipidemia                   | 4.7       | 3.9 - 5.7  | <.001   | 1.0            | 0.4 - 2.3 | 0.99    | 5.6                  | 4.6 - 6.9  | <.001   |
| Diabetes + Dyslipidemia                       | 5.6       | 3.2 - 8.9  | <.001   | 1.3            | 0.0 - 6.2 | 0.99    | 7.5                  | 4.3 - 12.1 | <.001   |
| All three conditions                          | 5.8       | 4.2 - 7.8  | <.001   | 1.6            | 0.3 - 4.8 | 0.55    | 7.2                  | 5.1 - 9.8  | <.001   |
| <b>Modifiable CVRF + lifestyle score</b>      |           |            |         |                |           |         |                      |            |         |
| No condition + Unhealthy lifestyle (0-2.0)    | 4.6       | 4.2 - 5.1  | <.001   | 1.7            | 1.3 - 2.1 | <.001   | 5.8                  | 5.2 - 6.4  | <.001   |
| No condition + Moderate lifestyle (2.5-3.0)   | 3.8       | 3.5 - 4.2  | <.001   | 1.2            | 1.0 - 1.5 | 0.29    | 4.5                  | 4.1 - 5.0  | <.001   |
| No condition + Healthy lifestyle (3.5-4)      | 2.6       | 2.3 - 2.9  | <.001   | 0.6            | 0.4 - 0.8 | 0.007   | 3.3                  | 2.9 - 3.8  | <.001   |
| Hypertension unhealthy                        | 6.3       | 5.1 - 7.7  | <.001   | 1.5            | 0.6 - 3.1 | 0.29    | 8.2                  | 6.6 - 10.1 | <.001   |
| Hypertension moderate                         | 4.6       | 3.7 - 5.8  | <.001   | 0.9            | 0.3 - 2.2 | 0.85    | 5.5                  | 4.3 - 7.0  | <.001   |
| Hypertension healthy                          | 4.0       | 2.8 - 5.6  | <.001   | 1.1            | 0.2 - 3.1 | 0.99    | 4.8                  | 3.1 - 7.0  | <.001   |
| Diabetes unhealthy                            | 5.4       | 3.2 - 8.7  | <.001   | 1.9            | 0.2 - 6.8 | 0.63    | 6.8                  | 3.7 - 11.3 | <.001   |
| Diabetes moderate                             | 9.0       | 5.8 - 13.1 | <.001   | 3.0            | 0.7 - 8.6 | 0.17    | 8.8                  | 5.0 - 14.2 | <.001   |
| Diabetes healthy                              | 4.6       | 2.0 - 9.0  | <.001   | 0.0            | 0.0 - 6.0 | 0.99    | 6.2                  | 2.5 - 12.8 | <.001   |
| Dyslipidemia unhealthy                        | 2.8       | 1.7 - 4.4  | <.001   | 0.0            | 0.0 - 1.9 | 0.22    | 3.9                  | 2.4 - 6.0  | <.001   |
| Dyslipidemia moderate                         | 4.8       | 3.6 - 6.2  | <.001   | 0.3            | 0.0 - 1.7 | 0.33    | 6.0                  | 4.5 - 7.9  | <.001   |
| Dyslipidemia healthy                          | 1.6       | 0.8 - 2.8  | 0.21    | 0.0            | 0.0 - 1.6 | 0.25    | 2.3                  | 1.1 - 4.1  | 0.024   |
| 2+ conditions unhealthy                       | 6.1       | 4.9 - 7.5  | <.001   | 1.1            | 0.3 - 2.7 | 0.99    | 7.6                  | 6.0 - 9.4  | <.001   |
| 2+ conditions moderate                        | 5.6       | 4.5 - 6.9  | <.001   | 1.3            | 0.4 - 2.9 | 0.66    | 6.9                  | 5.5 - 8.6  | <.001   |
| 2+ conditions healthy                         | 4.1       | 2.7 - 5.9  | <.001   | 1.0            | 0.1 - 3.6 | 0.99    | 5.1                  | 3.3 - 7.5  | <.001   |

**Table S9 continued.** Standardized mortality ratios (SMR) and 95% confidence intervals by cause of death among adult CCSS participants by modifiable risk factors.

|                                               | Subsequent neoplasm |             |        | Cardiac |            |        | Pulmonary |             |        | Other |            |        |
|-----------------------------------------------|---------------------|-------------|--------|---------|------------|--------|-----------|-------------|--------|-------|------------|--------|
|                                               | SMR                 | 95% CI      | P      | SMR     | 95% CI     | P      | SMR       | 95% CI      | P      | SMR   | 95% CI     | P      |
| <b>Behavioral/lifestyle risk factors</b>      |                     |             |        |         |            |        |           |             |        |       |            |        |
| <b>Smoking status</b>                         |                     |             |        |         |            |        |           |             |        |       |            |        |
| Never                                         | 8.9                 | 8.1 - 9.7   | <0.001 | 3.7     | 3.1 - 4.3  | <0.001 | 5.7       | 4.4 - 7.3   | <0.001 | 2.8   | 2.4 - 3.1  | <0.001 |
| Ever                                          | 7.8                 | 6.8 - 8.8   | <0.001 | 4.6     | 3.8 - 5.5  | <0.001 | 7.0       | 5.0 - 9.5   | <0.001 | 3.6   | 3.1 - 4.2  | <0.001 |
| <b>Heavy/risky drinker</b>                    |                     |             |        |         |            |        |           |             |        |       |            |        |
| No                                            | 8.4                 | 7.7 - 9.1   | <0.001 | 3.9     | 3.4 - 4.4  | <0.001 | 6.2       | 4.9 - 7.6   | <0.001 | 3.0   | 2.7 - 3.4  | <0.001 |
| Yes                                           | 7.7                 | 6.3 - 9.3   | <0.001 | 3.9     | 2.9 - 5.3  | <0.001 | 6.0       | 3.5 - 9.6   | <0.001 | 2.5   | 1.9 - 3.2  | <0.001 |
| <b>Body mass index</b>                        |                     |             |        |         |            |        |           |             |        |       |            |        |
| <18.5                                         | 14.1                | 10.3 - 18.9 | <0.001 | 8.8     | 5.3 - 13.7 | <0.001 | 25.0      | 14.3 - 40.7 | <0.001 | 8.5   | 6.1 - 11.5 | <0.001 |
| 18.5-24.9                                     | 8.2                 | 7.3 - 9.1   | <0.001 | 3.8     | 3.1 - 4.6  | <0.001 | 6.6       | 4.9 - 8.7   | <0.001 | 2.6   | 2.2 - 3.0  | <0.001 |
| 25.0-29.9                                     | 8.1                 | 7.0 - 9.2   | <0.001 | 3.2     | 2.5 - 4.1  | <0.001 | 4.4       | 2.8 - 6.5   | <0.001 | 2.2   | 1.8 - 2.7  | <0.001 |
| ≥30.0                                         | 8.3                 | 7.0 - 9.8   | <0.001 | 5.1     | 4.0 - 6.5  | <0.001 | 4.9       | 2.9 - 7.9   | <0.001 | 4.2   | 3.4 - 5.1  | <0.001 |
| <b>Physical activity (MET-hours/week)</b>     |                     |             |        |         |            |        |           |             |        |       |            |        |
| 0                                             | 9.6                 | 8.6 - 10.6  | <0.001 | 4.8     | 4.0 - 5.7  | <0.001 | 8.6       | 6.7 - 10.9  | <0.001 | 4.1   | 3.6 - 4.7  | <0.001 |
| 3-6                                           | 8.7                 | 7.3 - 10.2  | <0.001 | 4.2     | 3.2 - 5.4  | <0.001 | 4.5       | 2.5 - 7.4   | <0.001 | 2.3   | 1.8 - 2.9  | <0.001 |
| 9-12 or 15-21                                 | 6.4                 | 5.5 - 7.4   | <0.001 | 2.9     | 2.3 - 3.7  | <0.001 | 3.9       | 2.5 - 5.9   | <0.001 | 2.2   | 1.8 - 2.7  | <0.001 |
| <b>Healthy lifestyle score</b>                |                     |             |        |         |            |        |           |             |        |       |            |        |
| Unhealthy (0-2)                               | 9.0                 | 7.9 - 10.1  | <0.001 | 5.0     | 4.2 - 6.0  | <0.001 | 7.5       | 5.5 - 10.0  | <0.001 | 4.2   | 3.6 - 4.8  | <0.001 |
| Moderate (2.5-3)                              | 8.4                 | 7.4 - 9.4   | <0.001 | 3.9     | 3.2 - 4.8  | <0.001 | 6.5       | 4.7 - 8.7   | <0.001 | 3.1   | 2.6 - 3.6  | <0.001 |
| Healthy (3.5-4)                               | 8.0                 | 6.8 - 9.3   | <0.001 | 2.7     | 2.0 - 3.6  | <0.001 | 3.9       | 2.3 - 6.3   | <0.001 | 1.6   | 1.2 - 2.0  | 0.002  |
| <b>Hypertension</b>                           |                     |             |        |         |            |        |           |             |        |       |            |        |
| Yes                                           | 8.6                 | 7.2 - 10.1  | <0.001 | 5.9     | 4.6 - 7.4  | <0.001 | 7.5       | 4.8 - 11.1  | <0.001 | 5.4   | 4.4 - 6.5  | <0.001 |
| No                                            | 8.5                 | 7.8 - 9.2   | <0.001 | 3.6     | 3.1 - 4.1  | <0.001 | 5.9       | 4.7 - 7.3   | <0.001 | 2.6   | 2.3 - 2.9  | <0.001 |
| <b>Diabetes</b>                               |                     |             |        |         |            |        |           |             |        |       |            |        |
| Yes                                           | 9.5                 | 6.9 - 12.7  | <0.001 | 8.3     | 5.6 - 11.8 | <0.001 | 10.8      | 5.2 - 19.9  | <0.001 | 7.2   | 5.2 - 9.6  | <0.001 |
| No                                            | 8.4                 | 7.8 - 9.1   | <0.001 | 3.8     | 3.3 - 4.3  | <0.001 | 5.9       | 4.8 - 7.2   | <0.001 | 2.9   | 2.6 - 3.2  | <0.001 |
| <b>Dyslipidemia</b>                           |                     |             |        |         |            |        |           |             |        |       |            |        |
| Yes                                           | 8.9                 | 7.4 - 10.7  | <0.001 | 4.6     | 3.4 - 6.0  | <0.001 | 5.8       | 3.2 - 9.5   | <0.001 | 3.3   | 2.5 - 4.3  | <0.001 |
| No                                            | 8.4                 | 7.7 - 9.1   | <0.001 | 3.9     | 3.4 - 4.5  | <0.001 | 6.3       | 5.1 - 7.7   | <0.001 | 3.0   | 2.7 - 3.4  | <0.001 |
| <b>Modifiable cardiovascular risk factors</b> |                     |             |        |         |            |        |           |             |        |       |            |        |
| None                                          | 8.5                 | 7.8 - 9.2   | <0.001 | 3.4     | 2.9 - 4.0  | <0.001 | 5.9       | 4.6 - 7.4   | <0.001 | 2.5   | 2.2 - 2.9  | <0.001 |
| Any 1                                         | 8.0                 | 6.6 - 9.6   | <0.001 | 5.1     | 3.9 - 6.6  | <0.001 | 6.5       | 4.0 - 10.1  | <0.001 | 4.5   | 3.6 - 5.5  | <0.001 |
| Any 2                                         | 9.3                 | 7.3 - 11.6  | <0.001 | 6.1     | 4.4 - 8.2  | <0.001 | 7.8       | 4.1 - 13.3  | <0.001 | 5.3   | 4.0 - 6.9  | <0.001 |
| Hypertension, no diabetes or dyslipidemia     | 7.9                 | 6.1 - 10.1  | <0.001 | 5.8     | 4.1 - 8.0  | <0.001 | 7.2       | 3.7 - 12.6  | <0.001 | 5.5   | 4.2 - 7.0  | <0.001 |
| Diabetes, no dyslipidemia or hypertension     | 7.4                 | 3.7 - 13.3  | <0.001 | 8.2     | 3.8 - 15.6 | <0.001 | 6.8       | 0.8 - 24.6  | 0.071  | 7.0   | 3.9 - 11.4 | <0.001 |
| Dyslipidemia, no diabetes or hypertension     | 8.3                 | 6.1 - 11.1  | <0.001 | 3.4     | 1.9 - 5.6  | <0.001 | 5.5       | 2.0 - 11.9  | 0.002  | 2.2   | 1.2 - 3.5  | 0.008  |
| Hypertension + Diabetes                       | 8.5                 | 3.4 - 17.6  | <0.001 | 12.1    | 5.2 - 23.9 | <0.001 | 24.5      | 6.6 - 62.7  | <0.001 | 15.1  | 8.9 - 24.0 | <0.001 |
| Hypertension + Dyslipidemia                   | 8.5                 | 6.2 - 11.5  | <0.001 | 4.7     | 2.9 - 7.3  | <0.001 | 4.8       | 1.5 - 11.2  | 0.009  | 4.1   | 2.7 - 5.9  | <0.001 |
| Diabetes + Dyslipidemia                       | 9.4                 | 3.4 - 20.6  | <0.001 | 7.8     | 2.1 - 20.0 | 0.004  | 7.7       | 0.1 - 42.7  | 0.24   | 5.7   | 1.8 - 13.4 | 0.004  |
| All three conditions                          | 11.7                | 7.2 - 18.1  | <0.001 | 6.6     | 3.0 - 12.6 | <0.001 | 8.9       | 1.8 - 25.9  | 0.010  | 3.7   | 1.6 - 7.3  | 0.004  |
| <b>Modifiable CVRF + lifestyle score</b>      |                     |             |        |         |            |        |           |             |        |       |            |        |
| No condition + Unhealthy lifestyle (0-2.0)    | 9.3                 | 7.9 - 10.7  | <0.001 | 4.9     | 3.9 - 6.2  | <0.001 | 8.1       | 5.5 - 11.4  | <0.001 | 3.7   | 3.1 - 4.5  | <0.001 |
| No condition + Moderate lifestyle (2.5-3.0)   | 8.6                 | 7.5 - 9.9   | <0.001 | 3.0     | 2.2 - 3.8  | <0.001 | 5.7       | 3.8 - 8.2   | <0.001 | 2.7   | 2.2 - 3.2  | <0.001 |
| No condition + Healthy lifestyle (3.5-4)      | 7.5                 | 6.3 - 8.9   | <0.001 | 2.6     | 1.8 - 3.5  | <0.001 | 4.0       | 2.2 - 6.6   | <0.001 | 1.2   | 0.8 - 1.6  | 0.36   |
| Hypertension unhealthy                        | 10.1                | 6.9 - 14.2  | <0.001 | 7.4     | 4.4 - 11.6 | <0.001 | 7.8       | 2.5 - 18.3  | 0.002  | 7.4   | 5.0 - 10.4 | <0.001 |
| Hypertension moderate                         | 6.1                 | 3.8 - 9.2   | <0.001 | 6.0     | 3.5 - 9.6  | <0.001 | 8.3       | 3.0 - 18.2  | <0.001 | 4.4   | 2.8 - 6.7  | <0.001 |
| Hypertension healthy                          | 7.7                 | 4.0 - 13.4  | <0.001 | 2.4     | 0.5 - 7.1  | 0.22   | 3.2       | 0.0 - 17.9  | 0.50   | 4.2   | 2.0 - 7.8  | <0.001 |
| Diabetes unhealthy                            | 6.5                 | 1.7 - 16.6  | 0.009  | 6.5     | 1.3 - 19.1 | 0.026  | 8.2       | 0.1 - 45.7  | 0.24   | 6.9   | 2.6 - 14.9 | <0.001 |
| Diabetes moderate                             | 7.6                 | 2.1 - 19.5  | 0.004  | 10.3    | 2.8 - 26.4 | 0.001  | 9.6       | 0.1 - 53.3  | 0.19   | 8.7   | 3.5 - 17.9 | <0.001 |
| Diabetes healthy                              | 8.9                 | 1.8 - 26.1  | 0.008  | 8.1     | 0.9 - 29.1 | 0.047  | 0.0       | 0.0 - 55.1  | 0.99   | 4.2   | 0.5 - 15.1 | 0.15   |
| Dyslipidemia unhealthy                        | 5.8                 | 2.6 - 11.0  | <0.001 | 4.1     | 1.3 - 9.6  | 0.027  | 3.1       | 0.0 - 17.5  | 0.60   | 2.5   | 0.8 - 5.7  | 0.17   |

|                         |      |            |       |     |            |       |      |            |       |     |            |       |
|-------------------------|------|------------|-------|-----|------------|-------|------|------------|-------|-----|------------|-------|
| Dyslipidemia moderate   | 11·4 | 7·6 - 16·4 | <·001 | 4·4 | 2·0 - 8·4  | <·001 | 9·8  | 3·2 - 22·9 | <·001 | 2·4 | 1·0 - 4·7  | 0·041 |
| Dyslipidemia healthy    | 5·3  | 2·1 - 10·9 | <·001 | 0·8 | 0·0 - 4·6  | 0·69  | 0·0  | 0·0 - 13·7 | 0·99  | 1·5 | 0·3 - 4·4  | 0·52  |
| 2+ conditions unhealthy | 8·8  | 6·0 - 12·6 | <·001 | 6·2 | 3·6 - 10·0 | <·001 | 10·2 | 4·1 - 21·1 | <·001 | 7·0 | 4·7 - 10·0 | <·001 |
| 2+ conditions moderate  | 9·7  | 6·7 - 13·6 | <·001 | 6·8 | 4·1 - 10·7 | <·001 | 7·1  | 2·3 - 16·5 | 0·001 | 4·7 | 2·9 - 7·2  | <·001 |
| 2+ conditions healthy   | 9·2  | 4·9 - 15·7 | <·001 | 4·0 | 1·3 - 9·4  | 0·014 | 3·5  | 0·0 - 19·7 | 0·47  | 3·0 | 1·1 - 6·6  | 0·025 |

Cardiovascular risk factor (CVRF)

Mortality analyses exclude Canadian participants as National Death Index data is limited to U.S. participants

**Table S10.** Absolute excess risk (AER) of health-related death per 10,000 person years by healthy lifestyle score and then by number of modifiable cardiovascular risk factors (CVRF).

| Subset           | Survival after diagnosis (years) | All health-related causes |           |        | Specific health-related cause |          |        |         |         |        |           |        |        |       |          |        |
|------------------|----------------------------------|---------------------------|-----------|--------|-------------------------------|----------|--------|---------|---------|--------|-----------|--------|--------|-------|----------|--------|
|                  |                                  | AER                       | 95% CI    | P      | Subsequent neoplasm           |          |        | Cardiac |         |        | Pulmonary |        |        | Other |          |        |
|                  |                                  |                           |           |        | AER                           | 95% CI   | P      | AER     | 95% CI  | P      | AER       | 95% CI | P      | AER   | 95% CI   | P      |
| Unhealthy (0-2)  | 6-14                             | 16                        | 4 - 38    | 0.002  | 14                            | 4 - 33   | <0.001 | 2       | 0 - 16  | 0.39   | 3         | 0 - 16 | 0.15   | 0     | 0 - 8    | 0.91   |
|                  | 15-19                            | 21                        | 13 - 31   | <0.001 | 10                            | 5 - 18   | <0.001 | 4       | 1 - 9   | 0.002  | 1         | 0 - 5  | 0.094  | 6     | 2 - 13   | 0.002  |
|                  | 20-24                            | 31                        | 23 - 40   | <0.001 | 15                            | 10 - 21  | <0.001 | 5       | 2 - 9   | <0.001 | 3         | 1 - 6  | <0.001 | 8     | 4 - 14   | <0.001 |
|                  | 25-29                            | 52                        | 42 - 64   | <0.001 | 25                            | 18 - 33  | <0.001 | 9       | 5 - 15  | <0.001 | 3         | 1 - 7  | <0.001 | 15    | 10 - 22  | <0.001 |
|                  | 30-34                            | 74                        | 59 - 90   | <0.001 | 32                            | 23 - 42  | <0.001 | 15      | 9 - 23  | <0.001 | 7         | 3 - 12 | <0.001 | 20    | 13 - 29  | <0.001 |
|                  | 35-39                            | 136                       | 110 - 164 | <0.001 | 55                            | 40 - 74  | <0.001 | 28      | 17 - 42 | <0.001 | 10        | 4 - 19 | <0.001 | 43    | 29 - 61  | <0.001 |
|                  | ≥40                              | 191                       | 144 - 246 | <0.001 | 102                           | 70 - 143 | <0.001 | 32      | 14 - 58 | <0.001 | 14        | 3 - 33 | 0.002  | 43    | 21 - 74  | <0.001 |
| Moderate (2.5-3) | 6-14                             | 18                        | 7 - 35    | <0.001 | 15                            | 6 - 30   | <0.001 | 1       | 0 - 10  | 0.54   | 2         | 0 - 11 | 0.22   | 0     | 0 - 9    | 0.99   |
|                  | 15-19                            | 19                        | 12 - 27   | <0.001 | 7                             | 4 - 13   | <0.001 | 5       | 2 - 10  | <0.001 | 1         | 0 - 4  | 0.026  | 5     | 2 - 10   | <0.001 |
|                  | 20-24                            | 25                        | 19 - 32   | <0.001 | 15                            | 11 - 21  | <0.001 | 3       | 1 - 6   | <0.001 | 2         | 1 - 5  | <0.001 | 4     | 1 - 8    | 0.001  |
|                  | 25-29                            | 44                        | 35 - 54   | <0.001 | 23                            | 17 - 30  | <0.001 | 6       | 3 - 11  | <0.001 | 4         | 2 - 7  | <0.001 | 12    | 7 - 17   | <0.001 |
|                  | 30-34                            | 53                        | 41 - 67   | <0.001 | 30                            | 22 - 40  | <0.001 | 8       | 3 - 14  | <0.001 | 3         | 1 - 8  | 0.002  | 12    | 6 - 20   | <0.001 |
|                  | 35-39                            | 104                       | 82 - 130  | <0.001 | 54                            | 39 - 72  | <0.001 | 17      | 8 - 29  | <0.001 | 7         | 2 - 16 | <0.001 | 26    | 15 - 40  | <0.001 |
|                  | ≥40                              | 162                       | 117 - 216 | <0.001 | 63                            | 37 - 99  | <0.001 | 40      | 19 - 70 | <0.001 | 18        | 5 - 39 | <0.001 | 41    | 19 - 73  | <0.001 |
| Healthy (3.5-4)  | 6-14                             | 7                         | 0 - 21    | <0.001 | 1                             | 0 - 11   | 0.63   | 4       | 0 - 15  | 0.063  | 2         | 0 - 12 | 0.20   | 0     | 0 - 10   | 0.99   |
|                  | 15-19                            | 16                        | 9 - 24    | <0.001 | 8                             | 4 - 14   | <0.001 | 5       | 2 - 9   | <0.001 | 1         | 0 - 4  | 0.12   | 2     | 0 - 6    | 0.21   |
|                  | 20-24                            | 15                        | 9 - 22    | <0.001 | 14                            | 9 - 20   | <0.001 | 2       | 0 - 6   | 0.020  | 0         | 0 - 2  | 0.99   | 0     | 0 - 1    | 0.29   |
|                  | 25-29                            | 33                        | 24 - 44   | <0.001 | 25                            | 18 - 34  | <0.001 | 2       | 0 - 6   | 0.20   | 2         | 0 - 6  | 0.004  | 4     | 0 - 9    | 0.031  |
|                  | 30-34                            | 36                        | 23 - 52   | <0.001 | 23                            | 14 - 35  | <0.001 | 7       | 2 - 16  | 0.003  | 3         | 0 - 9  | 0.029  | 3     | 0 - 11   | 0.38   |
|                  | 35-39                            | 79                        | 53 - 111  | <0.001 | 45                            | 27 - 69  | <0.001 | 11      | 2 - 27  | 0.010  | 4         | 0 - 16 | 0.088  | 18    | 5 - 36   | 0.001  |
|                  | ≥40                              | 39                        | 5 - 90    | <0.001 | 34                            | 9 - 77   | 0.002  | 0       | 0 - 19  | 0.90   | 3         | 0 - 26 | 0.81   | 7     | 0 - 39   | 0.57   |
| No CVRF          | 6-14                             | 13                        | 7 - 22    | <0.001 | 10                            | 5 - 17   | <0.001 | 2       | 0 - 7   | 0.077  | 2         | 0 - 7  | 0.006  | 0     | 0 - 4    | 0.96   |
|                  | 15-19                            | 17                        | 13 - 22   | <0.001 | 8                             | 6 - 12   | <0.001 | 4       | 2 - 6   | <0.001 | 1         | 0 - 2  | 0.011  | 4     | 2 - 7    | <0.001 |
|                  | 20-24                            | 21                        | 17 - 25   | <0.001 | 14                            | 11 - 17  | <0.001 | 3       | 1 - 5   | <0.001 | 1         | 0 - 2  | 0.003  | 3     | 1 - 5    | <0.001 |
|                  | 25-29                            | 38                        | 32 - 44   | <0.001 | 23                            | 19 - 28  | <0.001 | 4       | 2 - 7   | <0.001 | 4         | 2 - 6  | <0.001 | 7     | 4 - 10   | <0.001 |
|                  | 30-34                            | 45                        | 37 - 54   | <0.001 | 25                            | 20 - 32  | <0.001 | 7       | 4 - 11  | <0.001 | 4         | 2 - 7  | <0.001 | 8     | 4 - 13   | <0.001 |
|                  | 35-39                            | 90                        | 74 - 107  | <0.001 | 44                            | 33 - 56  | <0.001 | 15      | 9 - 24  | <0.001 | 4         | 1 - 9  | 0.001  | 27    | 18 - 37  | <0.001 |
|                  | ≥40                              | 118                       | 87 - 154  | <0.001 | 63                            | 42 - 89  | <0.001 | 22      | 10 - 41 | <0.001 | 15        | 6 - 29 | <0.001 | 18    | 5 - 36   | 0.002  |
| 1 CVRF           | 6-14                             | 7                         | 0 - 56    | 0.16   | 0                             | 0 - 39   | 0.99   | 10      | 0 - 60  | 0.12   | 0         | 0 - 40 | 0.99   | 0     | 0 - 38   | 0.99   |
|                  | 15-19                            | 29                        | 13 - 54   | <0.001 | 7                             | 1 - 23   | 0.025  | 9       | 2 - 26  | 0.002  | 2         | 0 - 14 | 0.21   | 10    | 1 - 28   | 0.011  |
|                  | 20-24                            | 42                        | 27 - 62   | <0.001 | 22                            | 12 - 36  | <0.001 | 8       | 2 - 18  | <0.001 | 5         | 1 - 14 | <0.001 | 8     | 1 - 18   | 0.015  |
|                  | 25-29                            | 64                        | 46 - 85   | <0.001 | 26                            | 15 - 40  | <0.001 | 12      | 5 - 23  | <0.001 | 0         | 0 - 4  | 0.99   | 27    | 16 - 42  | <0.001 |
|                  | 30-34                            | 82                        | 59 - 109  | <0.001 | 34                            | 20 - 52  | <0.001 | 22      | 11 - 37 | <0.001 | 5         | 1 - 14 | 0.012  | 22    | 10 - 37  | <0.001 |
|                  | 35-39                            | 137                       | 101 - 179 | <0.001 | 67                            | 43 - 97  | <0.001 | 16      | 4 - 35  | 0.002  | 19        | 8 - 37 | <0.001 | 35    | 17 - 60  | <0.001 |
|                  | ≥40                              | 195                       | 131 - 276 | <0.001 | 81                            | 42 - 136 | <0.001 | 43      | 15 - 87 | <0.001 | 7         | 0 - 35 | 0.26   | 64    | 29 - 116 | <0.001 |

|         |       |     |           |       |     |          |       |    |         |       |    |         |       |    |          |       |
|---------|-------|-----|-----------|-------|-----|----------|-------|----|---------|-------|----|---------|-------|----|----------|-------|
| 2+ CVRF | 6-14  | 88  | 0 - 505   | 0.17  | 91  | 0 - 508  | 0.018 | 0  | 0 - 337 | 0.99  | 0  | 0 - 337 | 0.99  | 0  | 0 - 335  | 0.99  |
|         | 15-19 | 46  | 8 - 127   | 0.006 | 25  | 2 - 92   | 0.009 | 12 | 0 - 71  | 0.17  | 13 | 0 - 72  | 0.046 | 0  | 0 - 45   | 0.99  |
|         | 20-24 | 52  | 24 - 96   | <.001 | 17  | 3 - 46   | 0.002 | 07 | 0 - 32  | 0.13  | 14 | 2 - 41  | <.001 | 15 | 1 - 44   | 0.025 |
|         | 25-29 | 95  | 62 - 137  | <.001 | 34  | 16 - 62  | <.001 | 22 | 7 - 46  | <.001 | 6  | 0 - 22  | 0.045 | 34 | 15 - 62  | <.001 |
|         | 30-34 | 122 | 83 - 171  | <.001 | 54  | 30 - 89  | <.001 | 23 | 8 - 49  | <.001 | 5  | 0 - 22  | 0.112 | 39 | 18 - 70  | <.001 |
|         | 35-39 | 203 | 146 - 273 | <.001 | 85  | 50 - 132 | <.001 | 58 | 30 - 99 | <.001 | 10 | 0 - 34  | 0.030 | 50 | 23 - 90  | <.001 |
|         | ≥40   | 207 | 130 - 308 | <.001 | 104 | 53 - 178 | <.001 | 26 | 1 - 76  | 0.037 | 12 | 0 - 50  | 0.15  | 66 | 25 - 130 | <.001 |

Cardiovascular risk factor (CVRF)

**Table S11.** Relative rate of health-related late mortality and association with modifiable lifestyle and cardiovascular risk factors among CCSS participants who completed at least one survey at age  $\geq 18$  years, including interaction between dyslipidemia and other cardiovascular risk factors.

|                                            | Health-related cause |           |         | Subsequent neoplasm |           |         | Cardiac |           |         | Pulmonary |           |         | Other |           |         |
|--------------------------------------------|----------------------|-----------|---------|---------------------|-----------|---------|---------|-----------|---------|-----------|-----------|---------|-------|-----------|---------|
|                                            | RR                   | 95% CI    | p-value | RR                  | 95% CI    | p-value | RR      | 95% CI    | p-value | RR        | 95% CI    | p-value | RR    | 95% CI    | p-value |
| <b>Healthy lifestyle score</b>             |                      |           |         |                     |           |         |         |           |         |           |           |         |       |           |         |
| Unhealthy (0-2)                            | Ref                  |           |         | Ref                 |           |         | Ref     |           |         | Ref       |           |         | Ref   |           |         |
| Moderate (2.5-3)                           | 0.9                  | 0.8 - 1.0 | 0.031   | 0.9                 | 0.7 - 1.1 | 0.25    | 0.9     | 0.7 - 1.2 | 0.43    | 0.8       | 0.5 - 1.4 | 0.47    | 0.8   | 0.6 - 1.0 | 0.11    |
| Healthy (3.5-4)                            | 0.8                  | 0.7 - 0.9 | 0.002   | 0.9                 | 0.8 - 1.2 | 0.57    | 0.8     | 0.5 - 1.2 | 0.25    | 0.6       | 0.3 - 1.1 | 0.093   | 0.5   | 0.3 - 0.7 | <0.001  |
| <b>Cardiovascular risk factors</b>         |                      |           |         |                     |           |         |         |           |         |           |           |         |       |           |         |
| Hypertension No vs. Yes                    | 0.7                  | 0.6 - 0.8 | <0.001  | 0.9                 | 0.7 - 1.1 | 0.44    | 0.7     | 0.5 - 1.0 | 0.024   | 0.7       | 0.4 - 1.1 | 0.13    | 0.4   | 0.3 - 0.6 | <0.001  |
| Diabetes No vs. Yes                        | 0.6                  | 0.5 - 0.8 | <0.001  | 1.0                 | 0.7 - 1.6 | 0.87    | 0.4     | 0.3 - 0.7 | <0.001  | 0.6       | 0.3 - 1.5 | 0.29    | 0.4   | 0.3 - 0.6 | <0.001  |
| Dyslipidemia Yes with 2 other CVRFs vs. No | 0.6                  | 0.4 - 0.9 | 0.012   | 1.4                 | 0.7 - 2.7 | 0.28    | 0.4     | 0.2 - 1.0 | 0.042   | 0.5       | 0.1 - 2.1 | 0.32    | 0.2   | 0.1 - 0.6 | <0.001  |
| Dyslipidemia Yes with <2 other CVRFs vs No | 0.9                  | 0.7 - 1.0 | 0.16    | 1.0                 | 0.8 - 1.3 | 0.80    | 0.9     | 0.6 - 1.3 | 0.59    | 0.5       | 0.3 - 1.1 | 0.083   | 0.8   | 0.6 - 1.1 | 0.24    |

Relative rates are adjusted for treatment exposures: cranial irradiation dose, chest irradiation dose, anthracycline dose, and alkylating agent dose, and sociodemographic factors including: age at diagnosis, race/ethnicity, sex, and attained age, education, income, and insurance status.

Lifestyle factors, including smoking status, alcohol use, physical activity, and unhealthy weight, were assigned a score of 0 (unhealthy) to 1 (healthy) and combined to create a lifestyle score ranging from 0-4 which was further categorized as unhealthy (0-2), moderately healthy (2.5-3), and healthy (3.5-4).

Covariates presented in the table (lifestyle category and chronic conditions) and socioeconomic factors (education, income, insurance) factors were included in the model as time-dependent variables.

Due to interaction with other CVRF (hypertension and diabetes), dyslipidemia is reported in this model as dyslipidemia with 2 other CVRFs (yes vs no) which is dyslipidemia in the presence of both hypertension and diabetes and then dyslipidemia with <2 other CVRFs (yes vs no) which is all others with dyslipidemia including dyslipidemia without hypertension or diabetes and dyslipidemia with either hypertension or diabetes (but not both).

## References

1. Leisenring WM, Mertens AC, Armstrong GT, et al. Pediatric cancer survivorship research: experience of the Childhood Cancer Survivor Study. *J Clin Oncol* 2009;27:2319-27.
2. Robison LL, Armstrong GT, Boice JD, et al. The Childhood Cancer Survivor Study: a National Cancer Institute-supported resource for outcome and intervention research. *J Clin Oncol* 2009;27:2308-18. Anderson RN, Minino AM, Hoyert DL, Rosenberg HM. Comparability of cause of death between ICD-9 and ICD-10: preliminary estimates. *Natl Vital Stat Rep* 2001;49:1-32.
3. Li Y, Pan A, Wang DD, et al. Impact of healthy lifestyle factors on life expectancies in the US population. *Circulation* 2018;138:345-55.
4. Khaw KT, Wareham N, Bingham S, Welch A, Luben R, Day N. Combined impact of health behaviours and mortality in men and women: the EPIC-Norfolk prospective population study. *PLoS Med*. 2008 Jan 8;5(1):e12. doi: 10.1371/journal.pmed.0050012. Erratum in: *PLoS Med*. 2008 Mar 18;5(3):e70. PMID: 18184033; PMCID: PMC2174962.
5. Behrens G, Fischer B, Kohler S, Park Y, Hollenbeck AR, Leitzmann MF. Healthy lifestyle behaviors and decreased risk of mortality in a large prospective study of U.S. women and men. *Eur J Epidemiol*. 2013 May;28(5):361-72. doi: 10.1007/s10654-013-9796-9. Epub 2013 Mar 27. PMID: 23532745.
6. Yusuf S, Joseph P, Rangarajan S, et al. Modifiable risk factors, cardiovascular disease, and mortality in 155 722 individuals from 21 high-income, middle-income, and low-income countries (PURE): a prospective cohort study. *Lancet* 2020;395:795-808.
7. Scott JM, Li N, Liu Q, et al. Association of exercise with mortality in adult survivors of childhood cancer. *JAMA Oncol* 2018;4:1352-8.
8. Backinger CL, Lawrence D, Swan J, Winn DM, Breen N, Hartman A, Grana R, Tran D, Farrell S. Using the National Health Interview Survey to understand and address the impact of tobacco in the United States: past perspectives and future considerations. *Epidemiol Perspect Innov*. 2008;5:8.
9. Holford TR. Life tables with concomitant information. *Biometrics*. 1976 Sep;32(3):587-97.
10. Holford TR. The analysis of rates and of survivorship using log-linear models. *Biometrics*. 1980 Jun;36(2):299-305.
11. Laird N, Olivier D. Covariance analysis of censored survival data using log-linear analysis techniques. *J Am Stat Assoc* 1981;76: 231–240.
12. Friedman M. Piecewise exponential models for survival data with covariates. *Ann Stat*. 1982, 10: 101-113.
13. C. J. Stone and C. Y. Koo. “Additive Splines in Statistics”. In: *Proceedings of the Statistical Computing Section ASA*. Washington, DC, 1985.
14. Feijen EAM, Leisenring WM, Stratton KL, et al. Derivation of anthracycline and anthraquinone equivalence ratios to doxorubicin for late-onset cardiotoxicity. *JAMA Oncol* 2019;5:864-71.
15. Green DM, Nolan VG, Goodman PJ, et al. The cyclophosphamide equivalent dose as an approach for quantifying alkylating agent exposure: A report from the Childhood Cancer Survivor Study. *Pediatr Blood Cancer* 2014;61:53-67.
